# Supplementary material for: New insights into the key bifunctional role of sulfur in Fe–N–C single-atom catalysts for ORR/OER
Source: Royal Society of Chemistry journal article supplement (doi:10.1039/d1nr07851h), 2022-01-01
Supplement: d1nr07851h1.pdf [file d1nr07851h1.pdf]

## Supporting Information

### **New insights into the key bifunctional role of sulfur in Fe-N-C single-atom catalyst for ORR/OER**

Xiaofei Zhang,<sup>a</sup> Qi Zhang,<sup>\*a</sup> Jiewu Cui,<sup>a</sup> Jian Yan,<sup>b</sup> Jiaqin Liu<sup>\*a</sup> and Yucheng Wu <sup>\*b</sup>

<sup>a</sup> *Institute of Industry & Equipment Technology, Anhui Province Key Lab of Aerospace Structural Parts Forming  
Technology and Equipment, Hefei University of Technology, Hefei 230009, China*

<sup>b</sup> *School of Materials Science and Engineering, Hefei University of Technology, Hefei 230009, China*

### **Table of Contents**

|                                                                                                  |            |
|--------------------------------------------------------------------------------------------------|------------|
| <b>Details of computational methods.....</b>                                                     | <b>S2</b>  |
| <b>Structural information and adsorption energy data.....</b>                                    | <b>S4</b>  |
| <b>Mechanism of ORR on Pt(111) .....</b>                                                         | <b>S5</b>  |
| <b>Mechanism of OER on FeN<sub>4</sub>C, FeN<sub>3</sub>SC and RuO<sub>2</sub>.....</b>          | <b>S6</b>  |
| <b>Spin density and band structures of FeN<sub>4</sub>C and FeN<sub>3</sub>SC.....</b>           | <b>S9</b>  |
| <b>PDOS and d-band center of OOH@FeN<sub>4</sub>C and OOH@FeN<sub>3</sub>SC.....</b>             | <b>S11</b> |
| <b>ORR and OER on FeN<sub>2</sub>S<sub>2</sub>C, FeNS<sub>3</sub>C and FeS<sub>4</sub>C.....</b> | <b>S12</b> |
| <b>O<sub>2</sub> adsorption at the doped S atom.....</b>                                         | <b>S12</b> |
| <b>Electronic energies and Gibbs free energy of related compounds.....</b>                       | <b>S13</b> |
| <b>Fractional coordinates of related compounds.....</b>                                          | <b>S15</b> |

## Details of computational methods

ORR and OER processes are reversible. Previous research showed that ORR and OER process on SAC systems mainly followed the four-electron mechanism under alkaline conditions according to the electrochemical framework developed by Nørskov.<sup>1</sup> The overall reaction could be expressed as  $O_2 + 2H_2O + 4e^- \leftrightarrow 4OH^-$ . The whole reaction process was described as the following five elementary reactions (1)-(5):

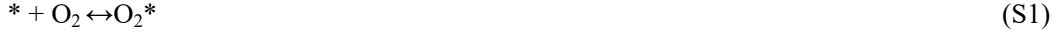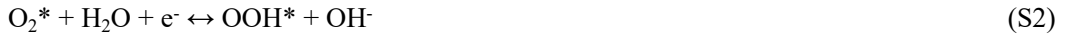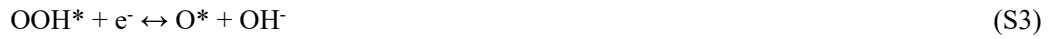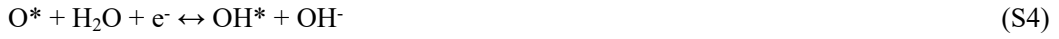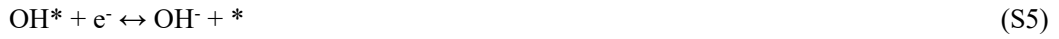

The first step (S1) is a pure chemical adsorption/desorption reaction involving no electron transfer. \* represents clean catalyst surface,  $O_2^*$ ,  $OOH^*$ ,  $O^*$  and  $OH^*$  represent intermediates adsorbed on different catalyst surfaces (FeN<sub>4</sub>C, FeN<sub>3</sub>SC, Pt(111), RuO<sub>2</sub>(110)), respectively. The corresponding reaction energies are expressed as:

$$\Delta E_{O_2^*} = E_{O_2^*} - E^* - (2E_{H_2O} - 2E_{H_2})$$

$$\Delta E_{OOH^*} = E_{OOH^*} - E^* - (2E_{H_2O} - \frac{3}{2}E_{H_2})$$

$$\Delta E_{O^*} = E_{O^*} - E^* - (E_{H_2O} - E_{H_2})$$

$$\Delta E_{OH^*} = E_{OH^*} - E^* - (E_{H_2O} - \frac{1}{2}E_{H_2})$$

where  $E_{H_2O}$  and  $E_{H_2}$  are the DFT electron energies of H<sub>2</sub>O and H<sub>2</sub> molecules in the gas phase, respectively.  $E^*$ ,  $E_{O_2^*}$ ,  $E_{OOH^*}$ ,  $E_{O^*}$ ,  $E_{OH^*}$  are the energies of clean catalyst surface and adsorbed system  $O_2^*$ ,  $OOH^*$ ,  $O^*$ ,  $OH^*$  respectively. The Gibbs free energy change of ORR/OER was calculated according to  $\Delta G = \Delta E + \Delta ZPE - T\Delta S + \Delta pH$ , where  $\Delta ZPE$  and  $\Delta S$  represent the zero point energy and entropy change from the initial state to the end state of the reaction process, respectively, T is 298.15 K. VASPKIT, a postprocessing tool in the VASP code, was adopted to deal with electronic structures.<sup>2</sup> The free energy of liquid  $H_2O(l)$  molecules was calculated at the gas phase of T=298.15 K with a pressure of P=0.035 bar. The free energy of O<sub>2</sub> was calculated according to

the reaction  $O_2 + 2H_2 = 2H_2O$  (the free energy change is 4.92 eV).  $\Delta_{pH}$  is the free energy correction at any pH value,  $\Delta G_{pH} = -kT \ln[H^+] = -kT \ln 10 \times pH$ . The theoretical overpotential ( $\eta$ ) under standard conditions is calculated according to the following equation under alkaline conditions:  $\eta^{ORR} = \{\Delta G1, -[\Delta G2, \Delta G3, \Delta G4, \Delta G5]^{max}/e + 0.460 \text{ V}\}^{max}$ ,  $\eta^{OER} = \{\Delta G1, [\Delta G2, \Delta G3, \Delta G4, \Delta G5]^{max}/e - 0.460 \text{ V}\}^{max}$ .

- [1] Nørskov, J.; Rossmeisl, J.; Logadottir, A.; Lindqvist, L., Origin of the overpotential for oxygen reduction at a fuel-cell cathode. *J. Phys. Chem. B* **2004**, *108*, 17886-17892.
- [2] Wang, V.; Xu, N.; Liu, J. C.; Tang, G.; Geng, W., 2019, arXiv: 1908.08269.

## Bond length information and adsorption energy data

**Table S1** Structural bond length information (unit: Å) and adsorption energy data (unit: eV) of ORR/OER intermediates on FeN<sub>4</sub>C and FeN<sub>3</sub>SC.

|                | d <sub>M-O</sub><br>(FeN <sub>4</sub> C) | d <sub>O-O</sub><br>(FeN <sub>4</sub> C) | d <sub>M-O</sub><br>(FeN <sub>3</sub> SC) | d <sub>O-O</sub><br>(FeN <sub>3</sub> SC) | E <sub>ad</sub> (FeN <sub>4</sub> C) | E <sub>ad</sub> (FeN <sub>3</sub> SC) |
|----------------|------------------------------------------|------------------------------------------|-------------------------------------------|-------------------------------------------|--------------------------------------|---------------------------------------|
| O <sub>2</sub> | 1.778                                    | 1.296                                    | 1.824/1.989                               | 1.355                                     | -2.123                               | -2.279                                |
| OOH            | 1.725                                    | 1.572                                    | 1.848                                     | 1.478                                     | -1.596                               | -1.807                                |
| O              | 1.657                                    | -                                        | 1.669                                     | -                                         | -4.249                               | -4.144                                |
| OH             | 1.826                                    | -                                        | 1.876                                     | -                                         | -3.465                               | -3.577                                |

**Table S2** Structural bond length information (unit: Å) and adsorption energy data (unit: eV) of ORR/OER intermediates on Pt(111) and RuO<sub>2</sub>(110).

|                | d <sub>M-O</sub> (Pt) | d <sub>O-O</sub> (Pt) | d <sub>M-O</sub><br>(RuO <sub>2</sub> ) | d <sub>O-O</sub><br>(RuO <sub>2</sub> ) | E <sub>ad</sub> (Pt) | E <sub>ad</sub> (RuO <sub>2</sub> ) |
|----------------|-----------------------|-----------------------|-----------------------------------------|-----------------------------------------|----------------------|-------------------------------------|
| O <sub>2</sub> | 2.015, 2.015          | 1.371                 | 1.901                                   | 1.275                                   | -1.613               | -1.515                              |
| OOH            | 2.006                 | 1.435                 | 1.911                                   | 1.420                                   | -1.046               | -1.566                              |
| O              | 2.049,2.049,2.049     | -                     | 1.698                                   | -                                       | -4.119               | -3.845                              |
| OH             | 2.160,2.148           | -                     | 1.902                                   | -                                       | -2.792               | -3.347                              |

## Mechanism of ORR on Pt(111)

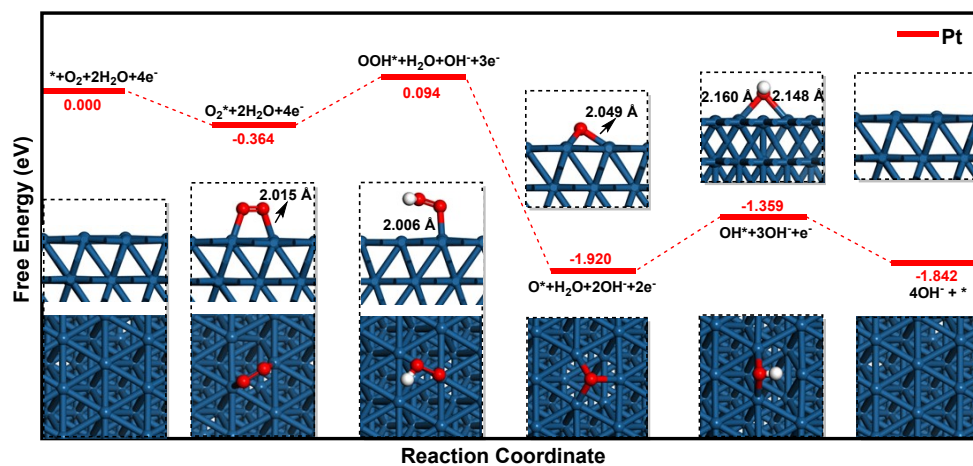

**Figure S1** Energy profile of ORR catalyzed by Pt and optimized structures for related species (pH=13).

### Mechanism of OER on FeN<sub>4</sub>C, FeN<sub>3</sub>SC and RuO<sub>2</sub>

For FeN<sub>4</sub>C, the reactant OH<sup>-</sup> arrives near Fe-N<sub>4</sub> site. Due to the adsorption of OH<sup>-</sup> by the positively charged Fe atom, Fe-O bond is formed. The first electron is released to obtain **OH@FeN<sub>4</sub>C** intermediate. The energy decreases from -1.842 V to -2.051 eV, indicating that OH<sup>-</sup> tends to adsorb on FeN<sub>4</sub>C surface. Then, **OH@FeN<sub>4</sub>C** releases the second electron and is oxidized to **O@FeN<sub>4</sub>C** with further reduced energy of -0.020 eV. In the third electron-release step, the O-OH bond is formed to give **OOH@FeN<sub>4</sub>C** intermediate. The instability of OOH on FeN<sub>4</sub>C surface increases the free energy by 1.605 eV. It makes the step **O@FeN<sub>4</sub>C**→**OOH@FeN<sub>4</sub>C** difficult to proceed with. This step is the RDS of FeN<sub>4</sub>C surface. Subsequently, **OOH@FeN<sub>4</sub>C** undergoes the final electron-release step to give intermediate **O<sub>2</sub>@FeN<sub>4</sub>C** with declined energy of -0.414 eV. The final product O<sub>2</sub> is obtained by desorbing from FeN<sub>4</sub>C surface with elevated energy of 0.880 eV. In summary, OH<sup>-</sup> is oxidized to the final product O<sub>2</sub> through four electron-release steps and one desorption step on FeN<sub>4</sub>C surface. The first (OH<sup>-</sup>→**OH@FeN<sub>4</sub>C**), the second (**OH@FeN<sub>4</sub>C**→**O@FeN<sub>4</sub>C**) and the fourth (**OOH@FeN<sub>4</sub>C**→**O<sub>2</sub>@FeN<sub>4</sub>C**) steps are exergonic, whereas the third (**O@FeN<sub>4</sub>C**→**OOH@FeN<sub>4</sub>C**) and last desorption (**O<sub>2</sub>@FeN<sub>4</sub>C**→O<sub>2</sub>) steps are endergonic. The third step **O@FeN<sub>4</sub>C**→**OOH@FeN<sub>4</sub>C** has the highest energy demand of 1.605 eV.

For FeN<sub>3</sub>SC surface, the OER process is similar to that of FeN<sub>4</sub>C. OH<sup>-</sup> first reaches near the active site Fe-N<sub>3</sub>|S. **OH@FeN<sub>3</sub>SC** is obtained after releasing the first electron with the reduced free energy of -0.329 eV. In the second electron-transfer process, **OH@FeN<sub>3</sub>SC** reacts with OH<sup>-</sup> to generate the intermediate **O@FeN<sub>3</sub>SC** and a H<sub>2</sub>O molecule. The shedding of H proton causes the bond length of Fe-O to be shortened to 1.669 Å in **O@FeN<sub>3</sub>SC** (1.876 Å in **OH@FeN<sub>3</sub>SC**) with the enhanced Fe-O interaction. The free energy increased by 0.199 eV after the step. Then the obtained **O@FeN<sub>3</sub>SC** reacts with OH<sup>-</sup> and releases the third electron to form **OOH@FeN<sub>3</sub>SC**. The bonding of O-OH causes the Fe-O bond length to be stretched to 1.848 Å with increased free energy of 1.276 eV. The step is the RDS of OER on FeN<sub>3</sub>SC surface, the same as FeN<sub>4</sub>C. The much lower barrier makes facile RDS compared with FeN<sub>4</sub>C. Subsequently, **OOH@FeN<sub>3</sub>SC** releases the fourth electron to form **O<sub>2</sub>@FeN<sub>3</sub>SC** and the second H<sub>2</sub>O molecule. The break of the OO-H bond induces the shortened O-O bond length of 1.355 Å in **O<sub>2</sub>@FeN<sub>3</sub>SC** (1.478 Å in **OOH@FeN<sub>3</sub>SC**) with the

declined free energy of -0.325 eV. Finally, the adsorbed  $O_2$  is dissociated from the  $FeN_3SC$  surface via a pure chemical desorption step. The free energy increased by 1.021 eV. In summary,  $OH^-$  undergoes four electron-release steps and one chemical desorption step on  $FeN_3SC$  surface to be oxidized to the final product  $O_2$ . The first ( $OH^- \rightarrow OH@FeN_3SC$ ) and the fourth ( $OOH@FeN_3SC \rightarrow O_2@FeN_3SC$ ) steps are exergonic, whereas the second ( $OH@FeN_3SC \rightarrow O@FeN_3SC$ ), the third ( $O@FeN_3SC \rightarrow OOH@FeN_3SC$ ) and the last desorption ( $O_2@FeN_3SC \rightarrow O_2$ ) steps are endergonic. The third step  $O@FeN_3SC \rightarrow OOH@FeN_3SC$  has the highest energy demand of 1.276 eV.

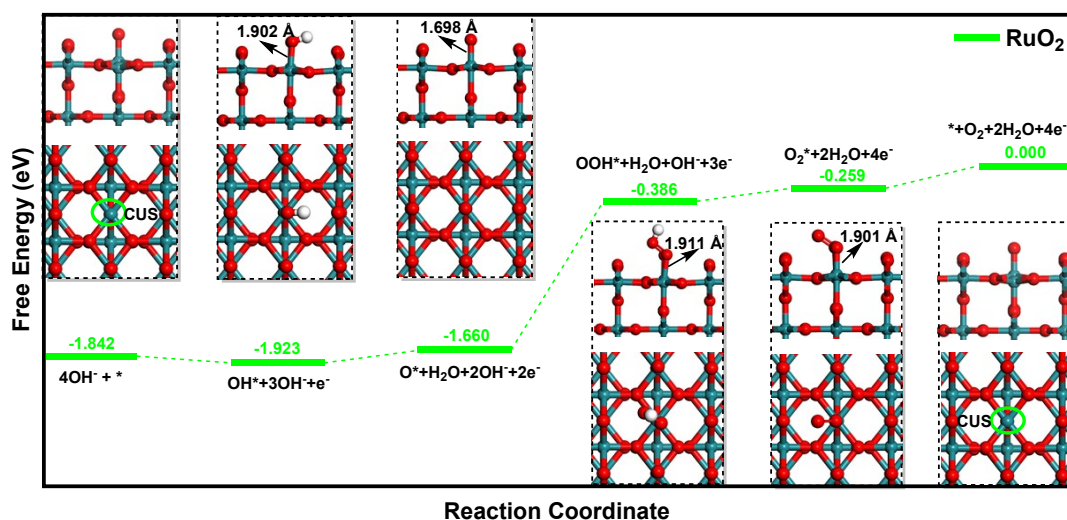

**Figure S2** Energy profile of OER catalyzed by  $RuO_2$  and optimized structures for related species (pH=13).

The OER mechanism on  $RuO_2(110)$  surface is investigated at  $U=0$  V, pH=13, as shown in Figure S2. The coordination unsaturated site (CUS) Top Ru was considered as the active site on the  $RuO_2(110)$  surface.<sup>1-2</sup> First,  $OH^-$  is adsorbed on Top Ru and gives the first electron to obtain  $OH@RuO_2$  with Ru-O bond length of 1.902 Å. The adsorption energy of  $OH@RuO_2$  is -3.347 eV. The Gibbs free energy decreases from -1.842 eV to -1.923 eV. Then,  $OH@RuO_2$  releases the second electron to obtain  $O@RuO_2$  (The adsorption energy is -3.845 eV) with increased energy of 0.263 eV. The Ru-O bond length is shortened to 1.698 Å. Then,  $O@RuO_2$  releases the third electron and is oxidized to  $OOH@RuO_2$  (The adsorption energy is -1.566 eV), with increased free energy

of 1.275 eV. The bonding of O-OH re-stretches the Ru-O bond to 1.911 Å. This step is the RDS on RuO<sub>2</sub>(110) surface, the same as FeN<sub>4</sub>C and FeN<sub>3</sub>SC surfaces. The energy trend of the first three electron-release steps is consistent with that of FeN<sub>3</sub>SC surface. Subsequently, the fourth electron-transfer step gives **O<sub>2</sub>@RuO<sub>2</sub>**, the OO-H bond breaks and the Ru-O bond length is 1.901 Å with slight change (1.911 Å in **OOH@RuO<sub>2</sub>**) due to the similar adsorption energy of -1.515 eV as **OOH@RuO<sub>2</sub>** (-1.566 eV). The free energy increases by 0.126 eV. Compared with FeN<sub>4</sub>C and FeN<sub>3</sub>SC (-2.123 eV and -2.279 eV), the desorption of O<sub>2</sub> on RuO<sub>2</sub>(110) surface becomes easier due to the instability of **O<sub>2</sub>@RuO<sub>2</sub>** (-1.515 eV). The free energy increases by 0.259 eV after O<sub>2</sub> desorption.

In summary, OH<sup>-</sup> undergoes four electron-transfer steps and one O<sub>2</sub>-desorption step to evolve oxygen on RuO<sub>2</sub>(110) surface. For the five steps, only the first step (OH<sup>-</sup>→**OH@RuO<sub>2</sub>**) is exergonic, while the following four steps (**OH@RuO<sub>2</sub>**→**O@RuO<sub>2</sub>**, **O@RuO<sub>2</sub>**→**OOH@RuO<sub>2</sub>**, **OOH@RuO<sub>2</sub>**→**O<sub>2</sub>@RuO<sub>2</sub>**, **O<sub>2</sub>@RuO<sub>2</sub>**→O<sub>2</sub>) are endergonic. The third step (**O@RuO<sub>2</sub>**→**OOH@RuO<sub>2</sub>**) has the highest energy demand of 1.275 eV.

- [1] Rossmesl, J.; Qu, Z.-W.; Zhu, H.; Kroes, G.-J.; Nørskov, J.K., Electrolysis of water on oxide surfaces. *J. Electroanal. Chem.* **2007**, *607*, 83-89.
- [2] Briquet, L. G. V.; Sarwar, M.; Mugo, J.; Jones, G.; Federico, C.-V., *ChemCatChem* **2017**, *9*, 1261-1268.



### Spin density and band structures of FeN<sub>4</sub>C and FeN<sub>3</sub>SC

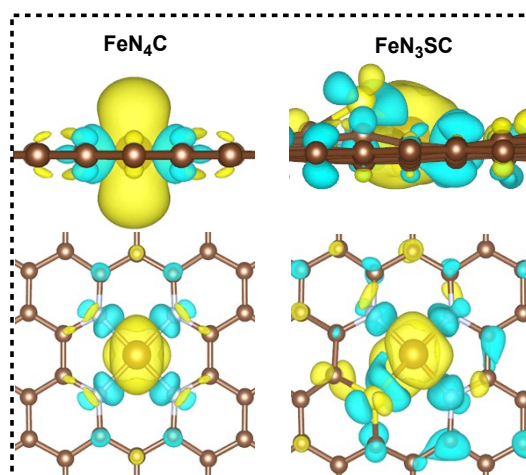

**Figure S3** Spin density distributions of FeN<sub>4</sub>C and FeN<sub>3</sub>SC slabs. Yellow and turquoise iso-surfaces correspond to spin-up and spin-down density, respectively. The iso-surface levels are 0.002 eÅ<sup>-3</sup>.

For both Fe-N<sub>4</sub> and Fe-N<sub>3</sub>|S, the spin mainly locates on Fe and the coordination N atoms. The high spin of the active site stabilizes an unpaired electron in antibonding  $\pi^*$  orbitals of the O atom far away from the H atom in the OOH intermediate through exchange interactions.<sup>1,2</sup>

- [1] Sun, Y.; Sun, S.; Yang, H.; Xi, S.; Gracia, J.; Xu, Z. J., Spin-related electron transfer and orbital interactions in oxygen electrocatalysis, *Adv. Mater.* **2020**, *32*, 2003297.
- [2] Li, Z.; Wang, Z.; Xi, S.; Zhao, X.; Sun, T.; Li, J.; Yu, W.; Xu, H.; Heng, T. S.; Hai, X.; Lyu, P.; Zhao, M.; Pennycook, S. J.; Ding, J.; Xiao, H.; Lu, J., Tuning the spin density of cobalt single-atom catalysts for efficient oxygen evolution, *ACS Nano* **2021**, *15*, 7105-7113.

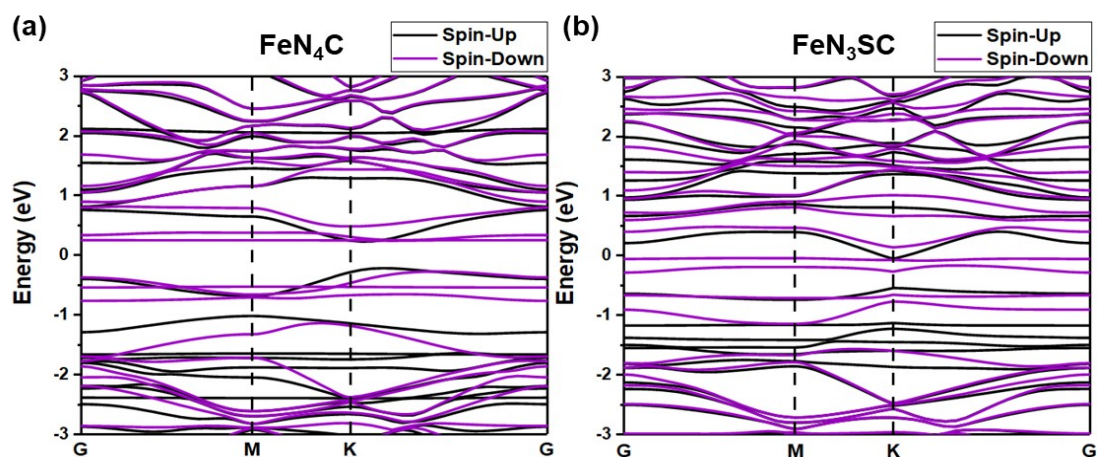

**Figure S4** Band structures of (a) FeN<sub>4</sub>C and (b) FeN<sub>3</sub>SC slabs. The Fermi level is set at 0 eV.

For FeN<sub>4</sub>C in Figure S4a, the valence band (VBM) of the spin-up channel is located at -0.215 eV and the conduction band (CBM) is located at 0.231 eV, so the band gap of the spin-up channel is 0.446 eV. The valence band and conduction band of the spin-down channel are located at -0.271 eV and 0.245 eV, respectively, so the band gap of the spin-down channel is 0.516 eV. Accordingly, the total band gap of FeN<sub>4</sub>C is 0.447 eV. For FeN<sub>3</sub>SC in Figure S4b, the VBM and the CBM of the spin-up channel are located at 0.000 eV and 0.028 eV, with a band gap of 0.028 eV. The VBM and CBM of the spin-down channel are located at -0.041 eV and 0.140 eV, with a band gap of 0.181 eV. That is, the total band gap of FeN<sub>3</sub>SC is 0.028 eV. S-doping reduces the FeN<sub>4</sub>C band gap and enhances the electrical conductivity, which is conducive to the electron transport in the catalytic reaction process.

DOS and d-band center of OOH@FeN<sub>4</sub>C and OOH@FeN<sub>3</sub>SC

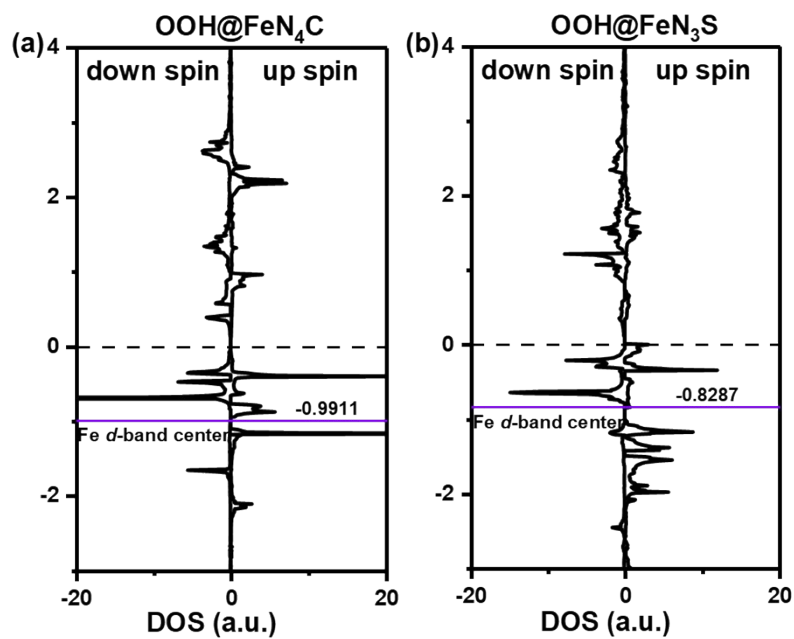

**Figure S5** Density of states of (a) OOH@FeN<sub>4</sub>C and (b) OOH@FeN<sub>3</sub>SC slabs. The Fermi level is set at 0 eV.

## ORR and OER on FeN<sub>2</sub>S<sub>2</sub>C, FeNS<sub>3</sub>C and FeS<sub>4</sub>C

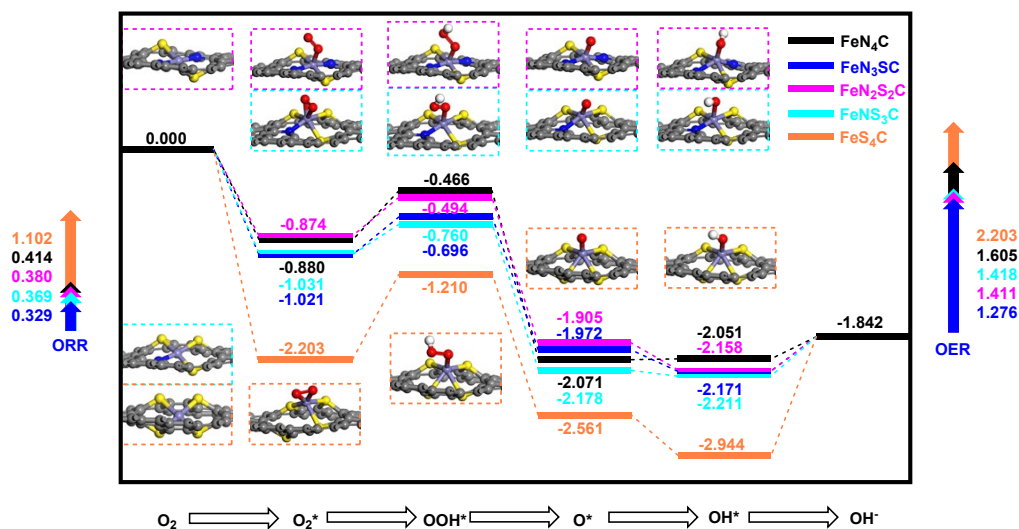

**Figure S6** Energy profile of ORR catalyzed by FeN<sub>4</sub>C, FeN<sub>3</sub>SC, FeN<sub>2</sub>S<sub>2</sub>C, FeNS<sub>3</sub>C and FeS<sub>4</sub>C. The side views of related species for FeN<sub>2</sub>S<sub>2</sub>C, FeNS<sub>3</sub>C and FeS<sub>4</sub>C are displayed in pink, turquoise and orange boxes, respectively (pH=13).

## O<sub>2</sub> adsorption at the doped S atom

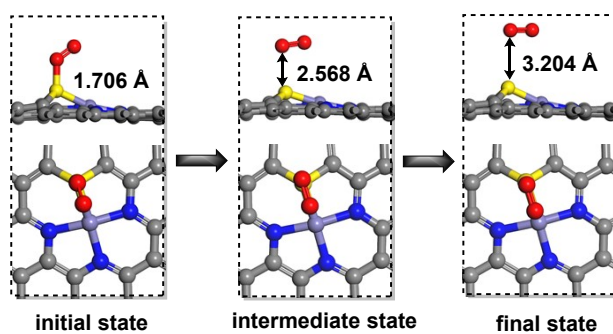

**Figure S7** The structure optimization of O<sub>2</sub> adsorption at the protruding S

We investigated the O<sub>2</sub> species adsorption at the protruding S atom of the catalyst. Figure S7 shows the optimization process of the O<sub>2</sub>@FeN<sub>3</sub>SC structure, in which O<sub>2</sub> gradually moves away from S atoms. In the final configuration, the distance between O<sub>2</sub> and S atoms is 3.204 Å, and the corresponding energy is 1.419 eV higher than that adsorbed on Fe center. Therefore, O<sub>2</sub> cannot be stably adsorbed on S, which is not conducive to the subsequent reaction steps.

**Electronic energies and Gibbs free energies of related compounds**

|                                     | Electronic energies (eV) | Gibbs Free Energy (eV) |
|-------------------------------------|--------------------------|------------------------|
| H <sub>2</sub> O                    | -14.2168 (g)             | -14.2186 (l)           |
| H <sub>2</sub> (g)                  | -6.7584 (g)              | -6.8049 (g)            |
| O <sub>2</sub> (g)                  | -9.9970 (g)              | -9.9074 (g)            |
| FeN <sub>4</sub> C                  | -446.1891                | -446.1891              |
| OH@FeN <sub>4</sub> C               | -456.7496                | -457.2149              |
| O@FeN <sub>4</sub> C                | -452.3310                | -453.8326              |
| OOH@FeN <sub>4</sub> C              | -461.0423                | -463.0429              |
| O <sub>2</sub> @FeN <sub>4</sub> C  | -457.0446                | -460.0550              |
| FeN <sub>3</sub> SC                 | -439.9843                | -439.9843              |
| OH@FeN <sub>3</sub> SC              | -450.6565                | -451.1302              |
| O@FeN <sub>3</sub> SC               | -446.0208                | -447.5283              |
| OOH@FeN <sub>3</sub> SC             | -455.0488                | -457.0687              |
| O <sub>2</sub> @FeN <sub>3</sub> SC | -450.9949                | -453.9908              |
| Pt(111)                             | -371.4430                | -371.4430              |
| OH@Pt(111)                          | -381.3307                | -381.7761              |
| O@Pt(111)                           | -377.4546                | -378.9351              |
| OOH@Pt(111)                         | -385.7463                | -387.7370              |
| O <sub>2</sub> @Pt(111)             | -381.7877                | -384.7930              |
| RuO <sub>2</sub> (110)              | -723.9835                | -723.9835              |

|                                                   |           |           |
|---------------------------------------------------|-----------|-----------|
| OH@RuO <sub>2</sub> (110)                         | -734.4255 | -734.8806 |
| O@RuO <sub>2</sub> (110)                          | -729.7211 | -731.2151 |
| OOH@RuO <sub>2</sub> (110)                        | -738.8070 | -740.7570 |
| O <sub>2</sub> @RuO <sub>2</sub> (110)            | -734.2308 | -737.2282 |
| FeN <sub>2</sub> S <sub>2</sub> C                 | -434.2138 | -434.2138 |
| OH@FeN <sub>2</sub> S <sub>2</sub> C              | -444.8318 | -444.5769 |
| O@FeN <sub>2</sub> S <sub>2</sub> C               | -440.1881 | -440.1518 |
| OOH@FeN <sub>2</sub> S <sub>2</sub> C             | -449.1094 | -448.7868 |
| O <sub>2</sub> @FeN <sub>2</sub> S <sub>2</sub> C | -445.0665 | -444.9947 |
| FeNS <sub>3</sub> C                               | -428.4830 | -428.4830 |
| OH@FeNS <sub>3</sub> C                            | -439.1849 | -438.8986 |
| O@FeNS <sub>3</sub> C                             | -434.7254 | -434.6937 |
| OOH@FeNS <sub>3</sub> C                           | -443.6048 | -443.3221 |
| O <sub>2</sub> @FeNS <sub>3</sub> C               | -439.4817 | -439.4210 |
| FeS <sub>4</sub> C                                | -422.7368 | -422.7368 |
| OH@FeS <sub>4</sub> C                             | -434.1204 | -433.8861 |
| O@FeS <sub>4</sub> C                              | -429.3380 | -429.3309 |
| OOH@FeS <sub>4</sub> C                            | -438.3172 | -438.0263 |
| O <sub>2</sub> @FeS <sub>4</sub> C                | -434.7432 | -434.6673 |

### Fractional Coordinates of related compounds (Angstroms)

H<sub>2</sub>O

|                     |                     |                     |
|---------------------|---------------------|---------------------|
| 1.0000000000000000  |                     |                     |
| 10.0000000000000000 | 0.0000000000000000  | 0.0000000000000000  |
| 0.0000000000000000  | 10.0000000000000000 | 0.0000000000000000  |
| 0.0000000000000000  | 0.0000000000000000  | 10.0000000000000000 |

O H  
1 2

Direct

|                    |                    |                    |
|--------------------|--------------------|--------------------|
| 0.5002564657334488 | 0.5036625592861707 | 0.5000023106255571 |
| 0.5801186069178664 | 0.5591976372671658 | 0.5011051555705607 |
| 0.4266850253486885 | 0.5672697604466648 | 0.4977925178038798 |

H<sub>2</sub>

|                     |                     |                     |
|---------------------|---------------------|---------------------|
| 1.0000000000000000  |                     |                     |
| 10.0000000000000000 | 0.0000000000000000  | 0.0000000000000000  |
| 0.0000000000000000  | 10.0000000000000000 | 0.0000000000000000  |
| 0.0000000000000000  | 0.0000000000000000  | 10.0000000000000000 |

H  
2

Direct

|                    |                    |                    |
|--------------------|--------------------|--------------------|
| 0.5003215167106916 | 0.5001134646165070 | 0.5000608968768915 |
| 0.4312684682893107 | 0.4706165533834906 | 0.4999391511231125 |

O<sub>2</sub>

|                     |                     |                     |
|---------------------|---------------------|---------------------|
| 1.0000000000000000  |                     |                     |
| 15.0000000000000000 | 0.0000000000000000  | 0.0000000000000000  |
| 0.0000000000000000  | 15.0000000000000000 | 0.0000000000000000  |
| 0.0000000000000000  | 0.0000000000000000  | 15.0000000000000000 |

O  
2

Direct

|                    |                    |                    |
|--------------------|--------------------|--------------------|
| 0.4958612942552798 | 0.5000000001087831 | 0.5002221211706002 |
| 0.5780286927447215 | 0.4999999998912170 | 0.4958078918294021 |

FeN<sub>4</sub>C

|                     |                     |                     |
|---------------------|---------------------|---------------------|
| 1.0000000000000000  |                     |                     |
| 12.3236999512000001 | 0.0000000000000000  | 0.0000000000000000  |
| -6.1625538564999998 | 10.6730391195000003 | 0.0000000000000000  |
| 0.0000000000000000  | 0.0000000000000000  | 15.0000000000000000 |

C N Fe  
44 4 1

Direct

|                    |                    |                    |
|--------------------|--------------------|--------------------|
| 0.9724344451043748 | 0.9885534238511363 | 0.2459654107772664 |
| 0.1073937600926753 | 0.0586669944033689 | 0.2459440098606689 |
| 0.1762413232482254 | 0.9945021513330029 | 0.2457663512719377 |
| 0.3103208146802112 | 0.0644624014575010 | 0.2461804650311980 |
| 0.3744537062055500 | 0.9945017878764095 | 0.2457559105881794 |
| 0.5074938525661122 | 0.0586894494806668 | 0.2459609746696825 |
| 0.5723530569233620 | 0.9885844623367780 | 0.2459364049753325 |
| 0.7053875374440840 | 0.0527785728177646 | 0.2457638281850990 |
| 0.7694992345964551 | 0.9828104014450597 | 0.2461566316265592 |
| 0.9035923106661661 | 0.0527592394200130 | 0.2457513437036733 |
| 0.9707292206912498 | 0.1871162822094947 | 0.2451421507959657 |
| 0.1039475711668336 | 0.2558860158838107 | 0.2456870799888693 |
| 0.1740578461926333 | 0.1930001971569152 | 0.2463403831264161 |
| 0.3089647279671726 | 0.2661407601514991 | 0.2472674940988842 |
| 0.3784234957503190 | 0.2006675022711359 | 0.2471256781651648 |
| 0.5133412440229707 | 0.2661298901324362 | 0.2473651324648898 |
| 0.5751544008487801 | 0.1930238910971296 | 0.2464494997021269 |
| 0.7081425832534082 | 0.2558788738717874 | 0.2458375265631720 |
| 0.7725811065351578 | 0.1871026553257605 | 0.2452082257033216 |
| 0.9054520795136870 | 0.2547156027965982 | 0.2446610133618992 |
| 0.9723710465721686 | 0.3885486421037583 | 0.2444786298310042 |
| 0.1043860091256621 | 0.4570143062918303 | 0.2448288717438281 |
| 0.1692295940400143 | 0.3894688672206512 | 0.2457401772570117 |
| 0.3003750061751574 | 0.4567629268026787 | 0.2470232215204873 |
| 0.7125511775113574 | 0.4567654562085032 | 0.2472647143413006 |
| 0.7764049563898298 | 0.3894636840046531 | 0.2459676142989882 |
| 0.9088142186716605 | 0.4570080555352730 | 0.2449878502269544 |
| 0.9754323412853821 | 0.5902248698757264 | 0.2449739662326154 |
| 0.1074710583902681 | 0.6587290903685223 | 0.2444538592226821 |
| 0.1709871649964072 | 0.5902223736023975 | 0.2448207989753996 |
| 0.3033841434369911 | 0.6577783098315060 | 0.2457281703845673 |
| 0.3672743950432603 | 0.5905439809255861 | 0.2470059974123035 |
| 0.7794307876572203 | 0.5905597052307587 | 0.2472545422701779 |
| 0.9105892738104294 | 0.6577913428861480 | 0.2459509252810770 |
| 0.9758787361876236 | 0.7913578091198629 | 0.2458096956827332 |
| 0.1091106259614116 | 0.8601848587611299 | 0.2451893357325174 |
| 0.1743885914869332 | 0.7925803704437913 | 0.2446494769336953 |
| 0.3072726721641596 | 0.8601701723748953 | 0.2451281177624401 |
| 0.3716695841863213 | 0.7913400779954803 | 0.2456597920075343 |
| 0.5046717034209339 | 0.8542471186912654 | 0.2463090311269332 |
| 0.5664797629207867 | 0.7811468910835647 | 0.2472172188257218 |



|                    |                    |                    |
|--------------------|--------------------|--------------------|
| 0.7014095805914262 | 0.8466336944617792 | 0.2470856363277825 |
| 0.7708650158073547 | 0.7811738310830484 | 0.2473289932970369 |
| 0.9057617193919694 | 0.8542314451321207 | 0.2464310112885749 |
| 0.3689839516285919 | 0.3961067704759340 | 0.2480088310001251 |
| 0.5832916817744150 | 0.3961053778022440 | 0.2481579738408794 |
| 0.4965440907481974 | 0.6512084424745662 | 0.2479607402991958 |
| 0.7108472518227207 | 0.6512252561994244 | 0.2481331140871033 |
| 0.5398906983319283 | 0.5236362986946563 | 0.2491457971290700 |

**OH@FeN<sub>4</sub>C**

1.0000000000000000

|                     |                     |                     |
|---------------------|---------------------|---------------------|
| 12.3236999512000001 | 0.0000000000000000  | 0.0000000000000000  |
| -6.1625538564999998 | 10.6730391195000003 | 0.0000000000000000  |
| 0.0000000000000000  | 0.0000000000000000  | 15.0000000000000000 |

| C  | N | Fe | O | H |
|----|---|----|---|---|
| 44 | 4 | 1  | 1 | 1 |

**Direct**

|                    |                    |                    |
|--------------------|--------------------|--------------------|
| 0.9726692284529156 | 0.9904439235198488 | 0.2452451207150230 |
| 0.1076515896607743 | 0.0606999561169100 | 0.2454053055762521 |
| 0.1764891699856140 | 0.9965794500484987 | 0.2456151248421151 |
| 0.3107265857484635 | 0.0667693754608196 | 0.2469484800738192 |
| 0.3747874358831818 | 0.9966003474829687 | 0.2461396405078294 |
| 0.5077761340350992 | 0.0606047534249386 | 0.2463400996027938 |
| 0.5725069982568368 | 0.9903354012611829 | 0.2464040167063220 |
| 0.7054894124773476 | 0.0544819255734841 | 0.2460763813360951 |
| 0.7695685003703508 | 0.9843474858432036 | 0.2467900700509806 |
| 0.9037808759417907 | 0.0545094958006795 | 0.2452844934263210 |
| 0.9708963727894946 | 0.1888953193858140 | 0.2437153029579868 |
| 0.1042729989352301 | 0.2578836491842432 | 0.2435578637416019 |
| 0.1745787211500549 | 0.1952721842338929 | 0.2452250919287402 |
| 0.3094622686659574 | 0.2685012873835054 | 0.2478025195673212 |
| 0.3788798649634215 | 0.2030174694040803 | 0.2488751022484420 |
| 0.5139436954354737 | 0.2684936890833858 | 0.2487288773540418 |
| 0.5754908688224606 | 0.1951333356112589 | 0.2463586022823454 |
| 0.7083723880423825 | 0.2578018696385510 | 0.2448395900844727 |
| 0.7727677894909913 | 0.1888662635818153 | 0.2445464611719198 |
| 0.9056212975121272 | 0.2564854223959609 | 0.2432345063128199 |
| 0.9725484676639634 | 0.3904077923881736 | 0.2420780563789377 |
| 0.1047458636545488 | 0.4588642850498537 | 0.2418696051035788 |
| 0.1696777744626959 | 0.3914041474336418 | 0.2428669777371853 |
| 0.3011835614917897 | 0.4585395339082424 | 0.2452258392801704 |
| 0.7119610074914179 | 0.4583849751007613 | 0.2456797986742448 |
| 0.7763673786989876 | 0.3913185476142144 | 0.2436871782270322 |

|                    |                    |                    |
|--------------------|--------------------|--------------------|
| 0.9087765121586662 | 0.4588204439941656 | 0.2421856119944176 |
| 0.9754523638664324 | 0.5922324216425067 | 0.2419877791102787 |
| 0.1076393344537520 | 0.6606839247183227 | 0.2422229084588831 |
| 0.1714194261053496 | 0.5922813370241485 | 0.2422704480086252 |
| 0.3038087741027178 | 0.6597942718744213 | 0.2440367695492332 |
| 0.3681683723587032 | 0.5926374683956593 | 0.2461829455286766 |
| 0.7789908885332395 | 0.5925812612613914 | 0.2448824270171073 |
| 0.9105107284225145 | 0.6597110784924075 | 0.2428769994143974 |
| 0.9760068073794484 | 0.7932448384278772 | 0.2435821140714604 |
| 0.1093413560399875 | 0.8622061348105131 | 0.2439531967462236 |
| 0.1746094252847659 | 0.7946050423652936 | 0.2434064316484708 |
| 0.3074826774234888 | 0.8622199802411917 | 0.2447369308188580 |
| 0.3718849402084791 | 0.7932711889901893 | 0.2451747120480081 |
| 0.5048045766540701 | 0.8558070268877594 | 0.2466911282942756 |
| 0.5664515387369753 | 0.7825653974170524 | 0.2492674231181111 |
| 0.7014586165862766 | 0.8481154462188997 | 0.2489403626125168 |
| 0.7708647518944276 | 0.7825656833217750 | 0.2474767192948472 |
| 0.9057869203514023 | 0.8558782801351754 | 0.2450306608373120 |
| 0.3699060704102042 | 0.3988356487777967 | 0.2484952496660879 |
| 0.5836762478439591 | 0.3985313805986871 | 0.2498257802052089 |
| 0.4966322627795228 | 0.6522487249755118 | 0.2507557379881485 |
| 0.7105292546449615 | 0.6524396699627389 | 0.2477090985248529 |
| 0.5401414720913722 | 0.5253905527052821 | 0.2676925628005566 |
| 0.5466382563827075 | 0.5250795557522602 | 0.3891451085457331 |
| 0.4827127862031897 | 0.5412522320790505 | 0.4141107888092993 |

**O@FeN<sub>4</sub>C**

|                     |                     |                     |
|---------------------|---------------------|---------------------|
| 1.0000000000000000  |                     |                     |
| 12.3236999512000001 | 0.0000000000000000  | 0.0000000000000000  |
| -6.1625538564999998 | 10.6730391195000003 | 0.0000000000000000  |
| 0.0000000000000000  | 0.0000000000000000  | 15.0000000000000000 |

| C  | N | Fe | O |
|----|---|----|---|
| 44 | 4 | 1  | 1 |

**Direct**

|                    |                    |                    |
|--------------------|--------------------|--------------------|
| 0.9721795449286283 | 0.9886089168619817 | 0.2458107670633435 |
| 0.1071247938903351 | 0.0587112184802383 | 0.2457386153024236 |
| 0.1759405503806877 | 0.9944998464488382 | 0.2462785531381035 |
| 0.3101063860219150 | 0.0645699591422281 | 0.2471324485443349 |
| 0.3742092657796710 | 0.9944995643555361 | 0.2460900735247335 |
| 0.5072350931322996 | 0.0587146770958753 | 0.2458303154488383 |
| 0.5720757848453784 | 0.9886136843698805 | 0.2457146410728121 |
| 0.7051047309630217 | 0.0528239053660634 | 0.2462461699276150 |
| 0.7691986412413770 | 0.9827559849398720 | 0.2470773826810770 |

|                    |                    |                    |
|--------------------|--------------------|--------------------|
| 0.9033721938685629 | 0.0528238795689023 | 0.2460603572508557 |
| 0.9704967580709343 | 0.1871604253038514 | 0.2450999844761184 |
| 0.1038888928921459 | 0.2560334949280892 | 0.2444821388185383 |
| 0.1738009762586850 | 0.1930704784778330 | 0.2453747249646486 |
| 0.3088529778342333 | 0.2663208794057245 | 0.2472562710494455 |
| 0.3781436456398908 | 0.2006741121912471 | 0.2482872482868254 |
| 0.5131144809708812 | 0.2663195500841168 | 0.2477715624066990 |
| 0.5749242535629803 | 0.1930746577891504 | 0.2460580665602606 |
| 0.7078141603008035 | 0.2560559458078197 | 0.2454380707124166 |
| 0.7723405517702109 | 0.1871738876033386 | 0.2455563867183700 |
| 0.9052258099994115 | 0.2547736843379323 | 0.2449835270521780 |
| 0.9721802930981643 | 0.3886988517283178 | 0.2441720033402956 |
| 0.1043897319968816 | 0.4570069855361490 | 0.2433456086769674 |
| 0.1693952101319507 | 0.3895541204015954 | 0.2434287197061821 |
| 0.3010107932099861 | 0.4564626703177255 | 0.2442529720466395 |
| 0.7111174345535552 | 0.4564735094532413 | 0.2457026532151787 |
| 0.7758283084202533 | 0.3895827569002199 | 0.2448249332547717 |
| 0.9082800033724739 | 0.4570090029979439 | 0.2443242054379151 |
| 0.9749305524682688 | 0.5903139015168889 | 0.2443059123479337 |
| 0.1071438648120308 | 0.6586246304553320 | 0.2441452755856236 |
| 0.1710426040538517 | 0.5903173678293300 | 0.2433288975798536 |
| 0.3035044402158627 | 0.6577723504144102 | 0.2434049468915770 |
| 0.3682123222859748 | 0.5908666052853617 | 0.2442455259878160 |
| 0.7783034451705168 | 0.5908517845603191 | 0.2456854239555297 |
| 0.9099079008792248 | 0.6577417277902348 | 0.2447921464713941 |
| 0.9754183337651522 | 0.7912683962767678 | 0.2454068600457630 |
| 0.1088280573906162 | 0.8601491539671927 | 0.2455527695523937 |
| 0.1741118724627009 | 0.7925493975968169 | 0.2449704661753611 |
| 0.3069987311718820 | 0.8601635008569397 | 0.2450967239762436 |
| 0.3715154650385700 | 0.7912924387780494 | 0.2444569110187750 |
| 0.5043933224618282 | 0.8542562879215920 | 0.2453381811720807 |
| 0.5661970215396157 | 0.7810086647783199 | 0.2472143310042751 |
| 0.7011354029424284 | 0.8466537965688072 | 0.2482226613828894 |
| 0.7704514273848130 | 0.7810023504058735 | 0.2477199795782954 |
| 0.9055091966920705 | 0.8542474844428772 | 0.2460174636531577 |
| 0.3686733460206101 | 0.3958345134281784 | 0.2473449708722091 |
| 0.5828117975017131 | 0.3958122040475413 | 0.2481540757812285 |
| 0.4965090726713155 | 0.6514938610148100 | 0.2473390726524261 |
| 0.7106515153207357 | 0.6515049952298100 | 0.2481307698567648 |
| 0.5395039721118778 | 0.5236580374445290 | 0.2706581369159340 |
| 0.5389456145030087 | 0.5235807464963183 | 0.3811100698648688 |

1.00000000000000  
 12.3236999512000001 0.0000000000000000 0.0000000000000000  
 -6.1625538564999998 10.6730391195000003 0.0000000000000000  
 0.0000000000000000 0.0000000000000000 15.0000000000000000

C N Fe O H  
 44 4 1 2 1

Direct

0.9732721547580105 0.9901279424591533 0.2433587442685605  
 0.1082154852148487 0.0601732005507329 0.2434514892546387  
 0.1769477630176789 0.9959324451357153 0.2438344968238425  
 0.3112205108327654 0.0661115370300014 0.2446942821795867  
 0.3753387581963576 0.9959675796261501 0.2438799899555438  
 0.5083530682393330 0.0602119185820148 0.2434399270194913  
 0.5732395282969420 0.9901765863893461 0.2434659870137006  
 0.7062677776017702 0.0543834523732220 0.2439603668965648  
 0.7703400832311893 0.9842818186551415 0.2446171709038657  
 0.9045140268033169 0.0543784122645605 0.2438620962475704  
 0.9716176552881519 0.1887116399119835 0.2437308628655508  
 0.1050430546402780 0.2575267084387338 0.2437058743600924  
 0.1749667742277801 0.1945779739775655 0.2437810461892542  
 0.3099442412207651 0.2677100692427761 0.2452504756040608  
 0.3791784807357269 0.2020008313465458 0.2458859127834549  
 0.5142407694529081 0.2677638315377327 0.2455285028350263  
 0.5760364189347393 0.1945873354675290 0.2437202969730422  
 0.7088939469426446 0.2574901739543551 0.2435793542721750  
 0.7735178230122138 0.1886815904806908 0.2437257472076816  
 0.9063813808515570 0.2563459059949130 0.2438617299943057  
 0.9733093832882136 0.3902450159679675 0.2437366603911550  
 0.1055216868080960 0.4585400122386632 0.2436695792989205  
 0.1705720720966465 0.3910817352912628 0.2437928469966827  
 0.3021968684106610 0.4578123345870914 0.2442009149473409  
 0.7118912328398759 0.4576513405543571 0.2441103956887863  
 0.7768662709904065 0.3909959003367075 0.2433894558036199  
 0.9093615199139983 0.4584989710299915 0.2433243717643531  
 0.9760027092028526 0.5918184813487238 0.2430761421220427  
 0.1082229568661603 0.6601702216228599 0.2432603552656894  
 0.1721438165064119 0.5918672485062101 0.2433084234473071  
 0.3046524782367079 0.6592682503371531 0.2432131541144402  
 0.3694476698229369 0.5925239395026236 0.2442475874336537  
 0.7792957554255463 0.5923725912447811 0.2436209699733851  
 0.9108583719526673 0.6591713650535287 0.2428333626091322  
 0.9764625430645854 0.7927701301139860 0.2430204150426624  
 0.1098684720942930 0.8616287630032208 0.2433230103027207  
 0.1751747454835752 0.7940645550437543 0.2433751750592775

|                    |                    |                    |
|--------------------|--------------------|--------------------|
| 0.3080669789851220 | 0.8616748527068603 | 0.2434639078601021 |
| 0.3726426750970905 | 0.7928500214935990 | 0.2433444884846177 |
| 0.5055097577432247 | 0.8557927852931112 | 0.2436201708417949 |
| 0.5673157013720738 | 0.7826202411993661 | 0.2455162286118283 |
| 0.7022880947081843 | 0.8482281421449834 | 0.2457886744575584 |
| 0.7715098330388417 | 0.7825471338705149 | 0.2449915073471165 |
| 0.9065290464935822 | 0.8557082007330848 | 0.2433420177429954 |
| 0.3697903607660549 | 0.3971526293577261 | 0.2453169971319485 |
| 0.5837159634953721 | 0.3970844985434757 | 0.2464499530592869 |
| 0.4978408133782447 | 0.6531217169734025 | 0.2469600588874629 |
| 0.7114272573158151 | 0.6528915758348556 | 0.2455958374523134 |
| 0.5404968787415343 | 0.5249572141896274 | 0.2671444369262711 |
| 0.5385875593864627 | 0.5262641291384809 | 0.3821186351109513 |
| 0.4836195961309792 | 0.3954191986532356 | 0.4295149001956124 |
| 0.4987418708447883 | 0.4270767336659433 | 0.4908650199809386 |

O<sub>2</sub>@FeN<sub>4</sub>C

1.0000000000000000

12.3236999512000001 0.0000000000000000 0.0000000000000000

-6.1625538564999998 10.6730391195000003 0.0000000000000000

0.0000000000000000 0.0000000000000000 15.0000000000000000

C N Fe O

44 4 1 2

Direct

|                    |                    |                    |
|--------------------|--------------------|--------------------|
| 0.9728630373319987 | 0.9886556196868134 | 0.2434992920168004 |
| 0.1078668801681243 | 0.0589195707259461 | 0.2434681326890894 |
| 0.1766823623864195 | 0.9947305632999379 | 0.2439950099106054 |
| 0.3108707642780971 | 0.0648390645303644 | 0.2450847287923164 |
| 0.3750029604015169 | 0.9947700344846109 | 0.2438991642795661 |
| 0.5080139043546603 | 0.0589500549731937 | 0.2437366943374579 |
| 0.5727619115781495 | 0.9886797579513159 | 0.2434173768635215 |
| 0.7057587235358126 | 0.0528690680315947 | 0.2438938549491209 |
| 0.7698323665430912 | 0.9827579578534114 | 0.2447472877316199 |
| 0.9040267167317094 | 0.0528306455020125 | 0.2436707634604268 |
| 0.9711421862517023 | 0.1872334396794233 | 0.2429031968898372 |
| 0.1045482684885326 | 0.2562055679915562 | 0.2425744327024791 |
| 0.1746356843964119 | 0.1934129700386941 | 0.2433678128568697 |
| 0.3096179967180533 | 0.2667146680333072 | 0.2458054662733307 |
| 0.3789622779021347 | 0.2010495976012541 | 0.2471208423014981 |
| 0.5138688495843667 | 0.2666722789302878 | 0.2474389441436433 |
| 0.5756562160794778 | 0.1934678786400740 | 0.2446431555762004 |
| 0.7085157125077137 | 0.2561473115170634 | 0.2441108142681490 |
| 0.7729544886626165 | 0.1872292733683813 | 0.2435911833860378 |

|                    |                    |                    |
|--------------------|--------------------|--------------------|
| 0.9058651511200343 | 0.2548507437074182 | 0.2431946405352375 |
| 0.9728108636584407 | 0.3887975214572688 | 0.2430331759324980 |
| 0.1049722958886225 | 0.4571277072357290 | 0.2424409139406351 |
| 0.1699087351823719 | 0.3896481946191334 | 0.2423382096533237 |
| 0.3014292702218078 | 0.4567252955337230 | 0.2434514931450729 |
| 0.7121990124161337 | 0.4568186567235180 | 0.2466113823430071 |
| 0.7765035344015505 | 0.3896695381526016 | 0.2443858279488258 |
| 0.9089904138093325 | 0.4571608780158480 | 0.2435941127479423 |
| 0.9756491040190884 | 0.5904498317049345 | 0.2435788397098161 |
| 0.1078349653413440 | 0.6587967759289037 | 0.2429905517584819 |
| 0.1716567626730882 | 0.5904645190494636 | 0.2423952029333994 |
| 0.3040728993946501 | 0.6579325536183147 | 0.2421416347715166 |
| 0.3685017658170645 | 0.5908442552556773 | 0.2432323886051040 |
| 0.7792162592449507 | 0.5908222311997904 | 0.2465249649669393 |
| 0.9106760505196213 | 0.6579511545498240 | 0.2442744038258490 |
| 0.9761854153524678 | 0.7914649518358353 | 0.2438917420793614 |
| 0.1095366570765317 | 0.8603691109118874 | 0.2435245846295439 |
| 0.1748300526176743 | 0.7927476636285549 | 0.2431549337817689 |
| 0.3077211883569547 | 0.8603593432149464 | 0.2428908687018773 |
| 0.3721623584181021 | 0.7913903164580023 | 0.2423582951769299 |
| 0.5050430844586901 | 0.8541812321219290 | 0.2430633944139834 |
| 0.5667330185483489 | 0.7808887601331848 | 0.2453024355600520 |
| 0.7017293761342762 | 0.8465539003824410 | 0.2466557030687730 |
| 0.7710390381878223 | 0.7809557476025291 | 0.2470716522394015 |
| 0.9060167460091206 | 0.8541505152891955 | 0.2443003818102210 |
| 0.3697629275909672 | 0.3966391589816522 | 0.2462994374536008 |
| 0.5835301362804005 | 0.3967817331018039 | 0.2500012924668802 |
| 0.4969494573267086 | 0.6509526948124728 | 0.2457628011538175 |
| 0.7106323728036088 | 0.6508916371161118 | 0.2498206362483700 |
| 0.5393140634037578 | 0.5239186222855069 | 0.2671793673961602 |
| 0.5319971283587467 | 0.5246625230581571 | 0.3855695238834894 |
| 0.4389092014671252 | 0.5243477534744156 | 0.4260470386895331 |

FeN<sub>3</sub>SC

1.00000000000000

12.3236999512000001 0.0000000000000000 0.0000000000000000

-6.1625538564999998 10.6730391195000003 0.0000000000000000

0.0000000000000000 0.0000000000000000 15.0000000000000000

C S N Fe

44 1 3 1

Direct

0.9718521527164433 0.9879682735759491 0.2448361393982988

0.1060058718281080 0.0565188845924530 0.2477339012578072

|                    |                    |                    |
|--------------------|--------------------|--------------------|
| 0.1753255179739472 | 0.9928931615491442 | 0.2414921435023915 |
| 0.3095443925882530 | 0.0611588031394378 | 0.2428733940563931 |
| 0.3747117892273147 | 0.9931969523237829 | 0.2375006214438552 |
| 0.5076008552365932 | 0.0584961566268149 | 0.2395818526898633 |
| 0.5728869434362043 | 0.9891675975426240 | 0.2415927612238609 |
| 0.7057364440252155 | 0.0533808487216245 | 0.2429034736598080 |
| 0.7701450197277487 | 0.9835950705838328 | 0.2459185442977387 |
| 0.9040983083330659 | 0.0532241046301112 | 0.2473731704231845 |
| 0.9719633250674249 | 0.1880201244355152 | 0.2497835710517488 |
| 0.1041393721089506 | 0.2560320250415220 | 0.2612466422327218 |
| 0.1720665646699646 | 0.1891098313715764 | 0.2623630689829314 |
| 0.3036802091252219 | 0.2509897611839641 | 0.2729803422545496 |
| 0.3772629725275844 | 0.1954682461351238 | 0.2548993626123519 |
| 0.5134913587787577 | 0.2655675261551122 | 0.2479727827055379 |
| 0.5751592846928846 | 0.1931841908922161 | 0.2402900943767622 |
| 0.7082177757084775 | 0.2560169346110924 | 0.2363203077420413 |
| 0.7730682601214312 | 0.1874430768163684 | 0.2388685871463910 |
| 0.9061327314247403 | 0.2550534399681735 | 0.2407660450200925 |
| 0.9724753895900691 | 0.3885274413987385 | 0.2348254895789158 |
| 0.1045224744467079 | 0.4569352296970016 | 0.2401780068749412 |
| 0.1686028258659703 | 0.3909155276347788 | 0.2593693961326769 |
| 0.2969837871021488 | 0.4650882081068320 | 0.2756813959684581 |
| 0.7107470599926904 | 0.4562933256522246 | 0.2366599134024021 |
| 0.7756987157192575 | 0.3894701485935217 | 0.2325807966891959 |
| 0.9082927346912245 | 0.4567185795755984 | 0.2294131608104191 |
| 0.9749779517966815 | 0.5899016869696049 | 0.2274970177507442 |
| 0.1072943095951336 | 0.6583190584732479 | 0.2292190347112816 |
| 0.1717397505062346 | 0.5906148670687588 | 0.2360178428866289 |
| 0.3036891211655552 | 0.6596793847705772 | 0.2428967212285459 |
| 0.3681560913506934 | 0.5946004968043422 | 0.2602810337979361 |
| 0.7786896972499997 | 0.5908225454599271 | 0.2355640636628563 |
| 0.9097723876911298 | 0.6573082252994971 | 0.2298184467730603 |
| 0.9753416785051031 | 0.7908975133499206 | 0.2337628083044541 |
| 0.1082169559704073 | 0.8590805213300393 | 0.2338643083539417 |
| 0.1741451031533172 | 0.7919116548369826 | 0.2308346211154534 |
| 0.3071440762483162 | 0.8595965020065575 | 0.2339915264624907 |
| 0.3722457416021089 | 0.7920760311095628 | 0.2389909569532951 |
| 0.5052236723115401 | 0.8552304171065777 | 0.2444428197555958 |
| 0.5671917948226135 | 0.7829898172736306 | 0.2521889244910744 |
| 0.7022119861683567 | 0.8477131580489714 | 0.2484477601963954 |
| 0.7715992259440994 | 0.7821552950301589 | 0.2446587688765360 |
| 0.9056512824026988 | 0.8541404225452940 | 0.2401309188939771 |
| 0.3734479106755685 | 0.3968013543095996 | 0.3289757567380907 |
| 0.5824290993501084 | 0.3964934142499080 | 0.2472433534250270 |

|                    |                    |                    |
|--------------------|--------------------|--------------------|
| 0.4977094568920379 | 0.6544461169920067 | 0.2627841049655861 |
| 0.7122691980192902 | 0.6526354380742156 | 0.2451564080785800 |
| 0.5461319438526004 | 0.5303334483354635 | 0.2702378180431109 |

OH@FeN<sub>3</sub>SC

|                     |                     |                     |
|---------------------|---------------------|---------------------|
| 1.000000000000000   |                     |                     |
| 12.3236999512000001 | 0.0000000000000000  | 0.0000000000000000  |
| -6.1625538564999998 | 10.6730391195000003 | 0.0000000000000000  |
| 0.0000000000000000  | 0.0000000000000000  | 15.0000000000000000 |

|    |   |   |    |   |   |
|----|---|---|----|---|---|
| C  | S | N | Fe | O | H |
| 44 | 1 | 3 | 1  | 1 | 1 |

Direct

|                    |                    |                    |
|--------------------|--------------------|--------------------|
| 0.9704716692563802 | 0.9899831261746654 | 0.2427531913057148 |
| 0.1045848756461667 | 0.0586494803360439 | 0.2449681104549886 |
| 0.1740297849582624 | 0.9949334217592373 | 0.2395918922375150 |
| 0.3081534376371598 | 0.0632581263214337 | 0.2421929194163020 |
| 0.3732645785049697 | 0.9951574495154177 | 0.2375413437679189 |
| 0.5061812878512330 | 0.0604093096299363 | 0.2405378094792333 |
| 0.5713937036314137 | 0.9910637201394825 | 0.2422641595154393 |
| 0.7041709797436577 | 0.0552651429508190 | 0.2432235628142807 |
| 0.7682977048856208 | 0.9851796849999079 | 0.2461446924530346 |
| 0.9023421035970741 | 0.0548696565219571 | 0.2456981471929098 |
| 0.9700208366392906 | 0.1896707749760280 | 0.2464928129355299 |
| 0.1022523613198678 | 0.2578355554074634 | 0.2564647698391106 |
| 0.1704137098705635 | 0.1914290670867826 | 0.2584850120716949 |
| 0.3021263118416719 | 0.2535083003576343 | 0.2707254673915069 |
| 0.3757026856759776 | 0.1976860430064295 | 0.2545584323470292 |
| 0.5121839155876343 | 0.2676662417588374 | 0.2494048373496609 |
| 0.5736943955093077 | 0.1950889933644114 | 0.2415702225102073 |
| 0.7065351786685712 | 0.2581204425997177 | 0.2363759377692320 |
| 0.7713460250660440 | 0.1892454421734304 | 0.2381855972670819 |
| 0.9041972096921881 | 0.2568634381960398 | 0.2379458401411062 |
| 0.9704844315592447 | 0.3903380679360313 | 0.2304508294597108 |
| 0.1027524693134027 | 0.4587609763374043 | 0.2348298101846128 |
| 0.1666920054289958 | 0.3927956076028573 | 0.2542271136949955 |
| 0.2946529444397063 | 0.4661238027979324 | 0.2716854700078554 |
| 0.7084305475194491 | 0.4582313106109056 | 0.2373150205014894 |
| 0.7738212781944664 | 0.3914997476052079 | 0.2313705725515307 |
| 0.9062866520441459 | 0.4585615247648296 | 0.2257606487156762 |
| 0.9734569753646214 | 0.5920840075634787 | 0.2232745214594319 |
| 0.1059235391264405 | 0.6602800939307067 | 0.2247685089276102 |
| 0.1704648577599592 | 0.5924717661962468 | 0.2310301053021115 |
| 0.3026127989633500 | 0.6612102468773235 | 0.2392882742315233 |



|                    |                    |                    |
|--------------------|--------------------|--------------------|
| 0.3671210409466655 | 0.5959856615021297 | 0.2576654735405097 |
| 0.7771380645738432 | 0.5933915958082900 | 0.2356088937130972 |
| 0.9083895039493248 | 0.6595196781823559 | 0.2270756939404035 |
| 0.9739259809782160 | 0.7928553372986832 | 0.2315402189255543 |
| 0.1070942037754978 | 0.8611802602106577 | 0.2316185114963082 |
| 0.1729418586481202 | 0.7940560017492689 | 0.2280539965110037 |
| 0.3059120510110988 | 0.8616469158207151 | 0.2326108868519403 |
| 0.3710168058148214 | 0.7939054978550786 | 0.2374532777253832 |
| 0.5037144875150296 | 0.8569051223456285 | 0.2443388799080117 |
| 0.5655022743195968 | 0.7841925601010052 | 0.2533034058171668 |
| 0.7006563222034086 | 0.8495179567682718 | 0.2502166619841743 |
| 0.7705735780331486 | 0.7842678211517811 | 0.2459092325122423 |
| 0.9043853957652860 | 0.8560794904649274 | 0.2387445104190989 |
| 0.3680440453300651 | 0.3977519331411863 | 0.3277272736855189 |
| 0.5811440620206352 | 0.3982958817793255 | 0.2492979812835258 |
| 0.4961066371148856 | 0.6560348600945376 | 0.2645021730478518 |
| 0.7124042621894989 | 0.6553671312842511 | 0.2487466886058938 |
| 0.5543413150610600 | 0.5371655152342256 | 0.2935717792873237 |
| 0.6213216536880000 | 0.5659239067805063 | 0.4091148955515334 |
| 0.5569558077649672 | 0.5309771499285617 | 0.4552540078973893 |

**O@FeN<sub>3</sub>SC**

|                     |                     |                     |
|---------------------|---------------------|---------------------|
| 1.0000000000000000  |                     |                     |
| 12.3236999512000001 | 0.0000000000000000  | 0.0000000000000000  |
| -6.1625538564999998 | 10.6730391195000003 | 0.0000000000000000  |
| 0.0000000000000000  | 0.0000000000000000  | 15.0000000000000000 |

| C  | S | N | Fe | O |
|----|---|---|----|---|
| 44 | 1 | 3 | 1  | 1 |

**Direct**

|                    |                    |                    |
|--------------------|--------------------|--------------------|
| 0.9710213382845212 | 0.9875659411362807 | 0.2422459814028358 |
| 0.1052332121742827 | 0.0561603722814258 | 0.2447093758982576 |
| 0.1744874406698989 | 0.9923737455558798 | 0.2392844662965710 |
| 0.3086506082592644 | 0.0606248958591282 | 0.2420994017685338 |
| 0.3739071706481833 | 0.9925095792021138 | 0.2381051815159492 |
| 0.5067209475878997 | 0.0578507072131983 | 0.2413303308381327 |
| 0.5720395293756418 | 0.9885286934522381 | 0.2432383834908383 |
| 0.7048492744766809 | 0.0529656844168415 | 0.2440934284810597 |
| 0.7692060847933189 | 0.9831297288713348 | 0.2461892398417197 |
| 0.9030908396463807 | 0.0526647398396044 | 0.2458601107324928 |
| 0.9708054307393935 | 0.1874193439537073 | 0.2479497433617140 |
| 0.1029595395451329 | 0.2554671951887983 | 0.2584027532229559 |
| 0.1711377225727804 | 0.1888031305030287 | 0.2589528875537537 |
| 0.3025666272031490 | 0.2505889434515320 | 0.2711843990536425 |

|                    |                    |                    |
|--------------------|--------------------|--------------------|
| 0.3761149392238475 | 0.1947628162706145 | 0.2550718183400920 |
| 0.5126660183437961 | 0.2649773146587863 | 0.2508255833870047 |
| 0.5742095863782598 | 0.1926654773741266 | 0.2427406090288972 |
| 0.7072007814203858 | 0.2557874955044462 | 0.2379802962535664 |
| 0.7719864167049688 | 0.1870194671529595 | 0.2397344783947005 |
| 0.9048945849431942 | 0.2545971574504391 | 0.2401039951498513 |
| 0.9711398116837548 | 0.3880563202726944 | 0.2337026749308758 |
| 0.1034321267270084 | 0.4564392117677661 | 0.2385599571582276 |
| 0.1673906073271286 | 0.3903232884883448 | 0.2573101146086196 |
| 0.2956705866889187 | 0.4635886843030557 | 0.2748240304753961 |
| 0.7088154865059119 | 0.4558315915121568 | 0.2374129863564542 |
| 0.7743415247125739 | 0.3891301659100057 | 0.2329370727809819 |
| 0.9069313306304818 | 0.4562280756163341 | 0.2284080292644834 |
| 0.9741253491881751 | 0.5895454016490282 | 0.2257503251080512 |
| 0.1066143133705080 | 0.6578021922005622 | 0.2279657565335705 |
| 0.1711979413834046 | 0.5900356045657200 | 0.2347645137272098 |
| 0.3034089579596171 | 0.6585908352571007 | 0.2423539280186889 |
| 0.3678983648067958 | 0.5932553042453070 | 0.2604772239325254 |
| 0.7773676607259483 | 0.5908160522576048 | 0.2335798309306062 |
| 0.9089156309039491 | 0.6569419950164297 | 0.2272471477745149 |
| 0.9744854699174970 | 0.7904086375441863 | 0.2310030076057822 |
| 0.1075813979463147 | 0.8585397706332859 | 0.2318895728883791 |
| 0.1735049816105654 | 0.7913920970778749 | 0.2299057745714871 |
| 0.3065663643514348 | 0.8589336377094434 | 0.2341592351489162 |
| 0.3716838333858129 | 0.7912791707859413 | 0.2395942281598123 |
| 0.5044024685758026 | 0.8545006177720608 | 0.2457798692485191 |
| 0.5664400498287010 | 0.7819737715709627 | 0.2542662590668490 |
| 0.7013575699282715 | 0.8473195314124582 | 0.2494894713515647 |
| 0.7709443501296226 | 0.7820653388085430 | 0.2433162738515929 |
| 0.9051280458060829 | 0.8539951204850424 | 0.2372738186589332 |
| 0.3669643007861218 | 0.3929444746866226 | 0.3310373661394589 |
| 0.5814383742844119 | 0.3958273036304493 | 0.2504096268112406 |
| 0.4974519557895399 | 0.6538547871110022 | 0.2657578513796869 |
| 0.7126951970482547 | 0.6535828851200465 | 0.2434733792816844 |
| 0.5554368476485665 | 0.5356091109768287 | 0.2937259323225684 |
| 0.6050416143578490 | 0.5569274072766432 | 0.3992023869007267 |

OOH@FeN<sub>3</sub>SC

1.0000000000000000

12.3236999512000001 0.0000000000000000 0.0000000000000000

-6.1625538564999998 10.6730391195000003 0.0000000000000000

0.0000000000000000 0.0000000000000000 15.0000000000000000

C S N Fe O H

44 1 3 1 2 1

Direct

|                     |                    |                    |
|---------------------|--------------------|--------------------|
| 0.9791385600175859  | 0.9861101918074811 | 0.2401345837836950 |
| 0.1133459810017470  | 0.0548802812064047 | 0.2425116975195922 |
| 0.1827809065424635  | 0.9911678033903359 | 0.2371545919601690 |
| 0.3168950509701894  | 0.0594387043492244 | 0.2398272257479953 |
| 0.3820724948420864  | 0.9913780937739882 | 0.2359816151646715 |
| 0.5150281349802199  | 0.0566414683121957 | 0.2389554470939560 |
| 0.5801919650797991  | 0.9872652999089019 | 0.2413016733045286 |
| 0.7129654980502413  | 0.0514444108734417 | 0.2421070353092444 |
| 0.7771156316878751  | 0.9813850515796660 | 0.2445830427973645 |
| 0.9111974517493544  | 0.0511275803035827 | 0.2438820054091353 |
| 0.9788659015940930  | 0.1859494216465718 | 0.2457344019659708 |
| 0.1111002380845795  | 0.2540296738362079 | 0.2561187199407810 |
| 0.1791901289120753  | 0.1875047844158062 | 0.2567334370786855 |
| 0.3110739886355610  | 0.2497625710756396 | 0.2686517734547611 |
| 0.3845448435612656  | 0.1939802803205140 | 0.2519783702637933 |
| 0.5210657055123277  | 0.2640301056700303 | 0.2468112934088890 |
| 0.5825607240567261  | 0.1913538744204856 | 0.2393409118611494 |
| 0.7153998711043108  | 0.2543009975477165 | 0.2344562258299508 |
| 0.7802004109073145  | 0.1854555459614246 | 0.2370903141791602 |
| 0.9129825943200666  | 0.2531017293931754 | 0.2375295074281629 |
| 0.9793321326746702  | 0.3866780776290797 | 0.2308642725865894 |
| 0.1114917205676436  | 0.4550799638639182 | 0.2365728535236789 |
| 0.1755428317401576  | 0.3890884097362075 | 0.2554284587300565 |
| 0.3035271012086503  | 0.4622136574670210 | 0.2730006434680251 |
| 0.7173060858390601  | 0.4544978612500952 | 0.2329826842423807 |
| 0.7826393831380497  | 0.3876464535166615 | 0.2285677106908215 |
| 0.9151805979576193  | 0.4548018757245716 | 0.2245816377690736 |
| 0.9823093536098026  | 0.5883323126664390 | 0.2217986979979899 |
| 0.1146720860166115  | 0.6564825951740288 | 0.2251419592274835 |
| 0.1791538883100069  | 0.5887565827255989 | 0.2329981386580429 |
| 0.31113135738936821 | 0.6574476516132798 | 0.2415193272529412 |
| 0.3759891737214488  | 0.5922931181642850 | 0.2596233395361219 |
| 0.7857281791671958  | 0.5895877254919849 | 0.2304234659099601 |
| 0.9171491856871886  | 0.6557885556651335 | 0.2233875949080038 |
| 0.9825958790459720  | 0.7890908190271090 | 0.2282784924209274 |
| 0.1158172607067961  | 0.8574048103901623 | 0.2294400542773174 |
| 0.1816536300176714  | 0.7902687325255243 | 0.2275335919144771 |
| 0.3146274669570619  | 0.8578076536514744 | 0.2324099858580861 |
| 0.3796649512013923  | 0.7901058745937178 | 0.2383923357771144 |
| 0.5124598021929962  | 0.8531584688576782 | 0.2443968416564735 |
| 0.5742809405360785  | 0.7804531129286246 | 0.2532132475204904 |
| 0.7093588095543188  | 0.8456277763690175 | 0.2485010469103535 |

|                    |                    |                    |
|--------------------|--------------------|--------------------|
| 0.7789731306305603 | 0.7801164007989859 | 0.2424810495270963 |
| 0.9129431692638490 | 0.8521894920914614 | 0.2354295623109286 |
| 0.3772039711096477 | 0.3927977463532646 | 0.3272676953106018 |
| 0.5901304150092034 | 0.3948309509498846 | 0.2460765440912400 |
| 0.5052001136344955 | 0.6524685111881282 | 0.2656826198752047 |
| 0.7206567814035040 | 0.6511263007228667 | 0.2440404263299963 |
| 0.5631862754553859 | 0.5320767314833631 | 0.2903748544327458 |
| 0.6125988816940693 | 0.5479639350267449 | 0.4082006452904409 |
| 0.7454111377096234 | 0.5887721956581173 | 0.4275740238684193 |
| 0.7590366417357083 | 0.6446186159027557 | 0.4780624186252326 |

**O<sub>2</sub>@FeN<sub>3</sub>SC**

|                     |                     |                     |
|---------------------|---------------------|---------------------|
| 1.0000000000000000  |                     |                     |
| 12.3236999512000001 | 0.0000000000000000  | 0.0000000000000000  |
| -6.1625538564999998 | 10.6730391195000003 | 0.0000000000000000  |
| 0.0000000000000000  | 0.0000000000000000  | 15.0000000000000000 |

|    |   |   |    |   |
|----|---|---|----|---|
| C  | S | N | Fe | O |
| 44 | 1 | 3 | 1  | 2 |

**Direct**

|                    |                    |                    |
|--------------------|--------------------|--------------------|
| 0.9692929959718459 | 0.9871116193613805 | 0.2440843523532000 |
| 0.1035085488259656 | 0.0557786692775323 | 0.2461300870528256 |
| 0.1730244145526349 | 0.9921500905862547 | 0.2406388284560009 |
| 0.3070713235435621 | 0.0605213164928053 | 0.2432440948446508 |
| 0.3722377285075199 | 0.9922821569419435 | 0.2389227103844161 |
| 0.5051330025600759 | 0.0576731887276882 | 0.2423611237357382 |
| 0.5701958168179930 | 0.9878815583910032 | 0.2439252817760973 |
| 0.7028984041672921 | 0.0522152118617342 | 0.2449288089774344 |
| 0.7670182487868785 | 0.9820864961984803 | 0.2478242641995033 |
| 0.9011283387720854 | 0.0518932184944044 | 0.2476626407799322 |
| 0.9686927727397414 | 0.1867087712510523 | 0.2487662778842479 |
| 0.1009436013037992 | 0.2548018721894844 | 0.2588118133248966 |
| 0.1690258515934176 | 0.1882996405352934 | 0.2602931778370236 |
| 0.3007510896409884 | 0.2505640460120511 | 0.2731254208342639 |
| 0.3743183677004832 | 0.1950937295677989 | 0.2558869666148560 |
| 0.5105481882013384 | 0.2653744568028558 | 0.2505510857543948 |
| 0.5723977701532892 | 0.1926720016862553 | 0.2432921234350810 |
| 0.7051456757623715 | 0.2552678383855120 | 0.2378454979160037 |
| 0.7699353135956150 | 0.1863023025427881 | 0.2399009206977870 |
| 0.9027726405871859 | 0.2538464801510079 | 0.2399277388860238 |
| 0.9692326071519558 | 0.3874196748174621 | 0.2324673336961873 |
| 0.1017051999819462 | 0.4556893548800112 | 0.2366696007645512 |
| 0.1659270072093600 | 0.3898493563555830 | 0.2559601545586518 |
| 0.2944777877247698 | 0.4626803716738683 | 0.2724879639851901 |

|                    |                    |                    |
|--------------------|--------------------|--------------------|
| 0.7069025012872687 | 0.4557342245565745 | 0.2383322924988047 |
| 0.7722483291046149 | 0.3886884298553946 | 0.2325688098547506 |
| 0.9049191293897860 | 0.4556125180020297 | 0.2273333244774411 |
| 0.9724367129406856 | 0.5892792192291462 | 0.2246223755567825 |
| 0.1049939273889277 | 0.6572845179164460 | 0.2263685699763523 |
| 0.1696045130623396 | 0.5894014505595172 | 0.2325375927861273 |
| 0.3019620016430622 | 0.6576803607064340 | 0.2395172742136295 |
| 0.3670106295197778 | 0.5920777604039722 | 0.2561706547142212 |
| 0.7762179446460308 | 0.5909630562705178 | 0.2377883509771715 |
| 0.9076894703469968 | 0.6569856095739920 | 0.2282569660159544 |
| 0.9731347662859013 | 0.7901491930596513 | 0.2329248949063736 |
| 0.1063462500318134 | 0.8584083210351151 | 0.2328026091722347 |
| 0.1720249615769303 | 0.7911448947227367 | 0.2293653650815723 |
| 0.3050816782628729 | 0.8586041149159152 | 0.2337822831632775 |
| 0.3701124402850056 | 0.7905444098630637 | 0.2379262768924927 |
| 0.5026934431988174 | 0.8534282325259773 | 0.2448523219151500 |
| 0.5644113655212718 | 0.7800575402964045 | 0.2524316780121431 |
| 0.6996152319837091 | 0.8463804032261538 | 0.2515305454838763 |
| 0.7698175695690852 | 0.7814006773054505 | 0.2487248992504378 |
| 0.9035616308959343 | 0.8533053310666082 | 0.2402592621457559 |
| 0.3636139954931611 | 0.3928256598491607 | 0.3328703832780018 |
| 0.5791341590775135 | 0.3968708775105092 | 0.2494958924757017 |
| 0.4957177875148411 | 0.6513419680061705 | 0.2599918630164448 |
| 0.7123636150575444 | 0.6528145226530040 | 0.2537605269261037 |
| 0.5544535158709135 | 0.5316140503258091 | 0.3017286373870899 |
| 0.6196669859971153 | 0.5155634780067017 | 0.4068073778563938 |
| 0.5835033381959693 | 0.6005565853732804 | 0.4248308152167331 |

Pt(111)

1.0000000000000000

11.1501998900999997 0.0000000000000000 0.0000000000000000

-5.5750999450999998 9.6563563621000004 0.0000000000000000

0.0000000000000000 0.0000000000000000 21.8281002045000001

Pt

64

Selective dynamics

Direct

|                    |                     |                    |   |   |   |
|--------------------|---------------------|--------------------|---|---|---|
| 0.0000000000000000 | 0.0000000000000000  | 0.1832499960000007 | F | F | F |
| 0.3333300199999982 | 0.1666700039999967  | 0.2875199960000003 | F | F | F |
| 0.1666649706331170 | 0.3333350703668828  | 0.3919795207144938 | T | T | T |
| 0.0000015077671374 | -0.0000015077671374 | 0.4978901235604116 | T | T | T |
| 0.0000000600000005 | 0.2500000120000010  | 0.1832499960000007 | F | F | F |
| 0.3333300319999992 | 0.4166700270000021  | 0.2875199960000003 | F | F | F |

|                    |                     |                    |   |   |   |
|--------------------|---------------------|--------------------|---|---|---|
| 0.1666649656331131 | 0.0833350403668803  | 0.3919795207144938 | T | T | T |
| 0.0000015137671379 | 0.2499985042328636  | 0.4978901235604116 | T | T | T |
| 0.2500000060000005 | 0.2500000120000010  | 0.1832499960000007 | F | F | F |
| 0.0833300099999974 | 0.4166700270000021  | 0.2875199960000003 | F | F | F |
| 0.4166649656331131 | 0.0833350403668803  | 0.3919795207144938 | T | T | T |
| 0.2500015137671380 | 0.2499985042328636  | 0.4978901235604116 | T | T | T |
| 0.2500000000000000 | 0.0000000000000000  | 0.1832499960000007 | F | F | F |
| 0.0833299980000035 | 0.1666700039999967  | 0.2875199960000003 | F | F | F |
| 0.4166649596331197 | 0.3333350703668828  | 0.3919795207144938 | T | T | T |
| 0.2500015077671375 | -0.0000015077671374 | 0.4978901235604116 | T | T | T |
| 0.5000000000000000 | 0.0000000000000000  | 0.1832499960000007 | F | F | F |
| 0.8333299549999964 | 0.1666700039999967  | 0.2875199960000003 | F | F | F |
| 0.6666650236331180 | 0.3333350703668828  | 0.3919795207144938 | T | T | T |
| 0.5000015077671376 | -0.0000015077671374 | 0.4978901235604116 | T | T | T |
| 0.5000000060000005 | 0.2500000120000010  | 0.1832499960000007 | F | F | F |
| 0.8333299669999974 | 0.4166700270000021  | 0.2875199960000003 | F | F | F |
| 0.6666650086331132 | 0.0833350403668803  | 0.3919795207144938 | T | T | T |
| 0.5000015137671381 | 0.2499985042328636  | 0.4978901235604116 | T | T | T |
| 0.7500000060000005 | 0.2500000120000010  | 0.1832499960000007 | F | F | F |
| 0.5833299669999974 | 0.4166700270000021  | 0.2875199960000003 | F | F | F |
| 0.9166650086331132 | 0.0833350403668803  | 0.3919795207144938 | T | T | T |
| 0.7500015137671381 | 0.2499985042328636  | 0.4978901235604116 | T | T | T |
| 0.7500000000000000 | 0.0000000000000000  | 0.1832499960000007 | F | F | F |
| 0.5833299549999964 | 0.1666700039999967  | 0.2875199960000003 | F | F | F |
| 0.9166650236331180 | 0.3333350703668828  | 0.3919795207144938 | T | T | T |
| 0.7500015077671376 | -0.0000015077671374 | 0.4978901235604116 | T | T | T |
| 0.0000000120000010 | 0.5000000229999984  | 0.1832499960000007 | F | F | F |
| 0.3333300159999979 | 0.6666700390000031  | 0.2875199960000003 | F | F | F |
| 0.1666649556331193 | 0.8333350193668820  | 0.3919795207144938 | T | T | T |
| 0.0000015197671384 | 0.4999985152328609  | 0.4978901235604116 | T | T | T |
| 0.0000000169999979 | 0.7500000349999993  | 0.1832499960000007 | F | F | F |
| 0.3333300469999969 | 0.9166700999999975  | 0.2875199960000003 | F | F | F |
| 0.1666649856331147 | 0.5833350573668852  | 0.3919795207144938 | T | T | T |
| 0.0000015247671353 | 0.7499985272328618  | 0.4978901235604116 | T | T | T |
| 0.2500000169999979 | 0.7500000349999993  | 0.1832499960000007 | F | F | F |
| 0.0833300469999969 | 0.9166700999999975  | 0.2875199960000003 | F | F | F |
| 0.4166649746331174 | 0.5833350573668852  | 0.3919795207144938 | T | T | T |
| 0.2500015247671353 | 0.7499985272328618  | 0.4978901235604116 | T | T | T |
| 0.2500000120000010 | 0.5000000229999984  | 0.1832499960000007 | F | F | F |
| 0.0833299949999997 | 0.6666700390000031  | 0.2875199960000003 | F | F | F |
| 0.4166649556331194 | 0.8333350193668820  | 0.3919795207144938 | T | T | T |
| 0.2500015197671385 | 0.4999985152328609  | 0.4978901235604116 | T | T | T |
| 0.5000000120000010 | 0.5000000229999984  | 0.1832499960000007 | F | F | F |
| 0.8333299729999979 | 0.6666700390000031  | 0.2875199960000003 | F | F | F |

|                    |                    |                    |   |   |   |
|--------------------|--------------------|--------------------|---|---|---|
| 0.6666649986331195 | 0.8333350193668820 | 0.3919795207144938 | T | T | T |
| 0.5000015197671386 | 0.4999985152328609 | 0.4978901235604116 | T | T | T |
| 0.5000000169999979 | 0.7500000349999993 | 0.1832499960000007 | F | F | F |
| 0.8333300039999969 | 0.9166700999999975 | 0.2875199960000003 | F | F | F |
| 0.6666650176331175 | 0.5833350573668852 | 0.3919795207144938 | T | T | T |
| 0.5000015247671354 | 0.7499985272328618 | 0.4978901235604116 | T | T | T |
| 0.7500000169999979 | 0.7500000349999993 | 0.1832499960000007 | F | F | F |
| 0.5833300039999969 | 0.9166700999999975 | 0.2875199960000003 | F | F | F |
| 0.9166650176331175 | 0.5833350573668852 | 0.3919795207144938 | T | T | T |
| 0.7500015247671354 | 0.7499985272328618 | 0.4978901235604116 | T | T | T |
| 0.7500000120000010 | 0.5000000229999984 | 0.1832499960000007 | F | F | F |
| 0.5833299729999979 | 0.6666700390000031 | 0.2875199960000003 | F | F | F |
| 0.9166649986331195 | 0.8333350193668820 | 0.3919795207144938 | T | T | T |
| 0.7500015197671386 | 0.4999985152328609 | 0.4978901235604116 | T | T | T |

OOH@Pt(111)

1.0000000000000000

11.1501998900999997 0.0000000000000000 0.0000000000000000

-5.5750999450999998 9.6563563621000004 0.0000000000000000

0.0000000000000000 0.0000000000000000 21.8281002045000001

Pt O H

64 1 1

Selective dynamics

Direct

|                     |                     |                    |   |   |   |
|---------------------|---------------------|--------------------|---|---|---|
| 0.0000000000000000  | 0.0000000000000000  | 0.1832499960000007 | F | F | F |
| 0.3333300199999982  | 0.1666700399999967  | 0.2875199960000003 | F | F | F |
| 0.1616944465078768  | 0.3304416390475797  | 0.3916366158034038 | T | T | T |
| -0.0097600908286562 | -0.0041963685988275 | 0.4981670058746161 | T | T | T |
| 0.0000000060000005  | 0.2500000120000010  | 0.1832499960000007 | F | F | F |
| 0.3333300319999992  | 0.4166700270000021  | 0.2875199960000003 | F | F | F |
| 0.1644384523600124  | 0.0826337917086113  | 0.3918754423224987 | T | T | T |
| -0.0132018795721636 | 0.2436691891060634  | 0.4986148158685291 | T | T | T |
| 0.2500000060000005  | 0.2500000120000010  | 0.1832499960000007 | F | F | F |
| 0.0833300099999974  | 0.4166700270000021  | 0.2875199960000003 | F | F | F |
| 0.4127797515987129  | 0.0817774718072451  | 0.3920778554862295 | T | T | T |
| 0.2347619909449383  | 0.2410010701306992  | 0.4990546316999880 | T | T | T |
| 0.2500000000000000  | 0.0000000000000000  | 0.1832499960000007 | F | F | F |
| 0.0833299980000035  | 0.1666700399999967  | 0.2875199960000003 | F | F | F |
| 0.4144140290476266  | 0.3364249204363345  | 0.3957478210619573 | T | T | T |
| 0.2392724786831085  | -0.0047485667335506 | 0.4988921371085572 | T | T | T |
| 0.5000000000000000  | 0.0000000000000000  | 0.1832499960000007 | F | F | F |
| 0.8333299549999964  | 0.1666700399999967  | 0.2875199960000003 | F | F | F |
| 0.6618742298236693  | 0.3311058342846754  | 0.3921308348130473 | T | T | T |

|                     |                     |                    |   |   |   |
|---------------------|---------------------|--------------------|---|---|---|
| 0.4887340538582380  | -0.0030877844032123 | 0.4989514044371478 | T | T | T |
| 0.5000000060000005  | 0.2500000120000010  | 0.1832499960000007 | F | F | F |
| 0.8333299669999974  | 0.4166700270000021  | 0.2875199960000003 | F | F | F |
| 0.6618355822468392  | 0.0813613109104643  | 0.3921059789653674 | T | T | T |
| 0.4887887939478027  | 0.2430748017196184  | 0.4991342788028324 | T | T | T |
| 0.7500000060000005  | 0.2500000120000010  | 0.1832499960000007 | F | F | F |
| 0.5833299669999974  | 0.4166700270000021  | 0.2875199960000003 | F | F | F |
| 0.9126563540543166  | 0.0813404198877892  | 0.3919048747463120 | T | T | T |
| 0.7386090894825265  | 0.2448268780149437  | 0.4987101226667939 | T | T | T |
| 0.7500000000000000  | 0.0000000000000000  | 0.1832499960000007 | F | F | F |
| 0.5833299549999964  | 0.1666700039999967  | 0.2875199960000003 | F | F | F |
| 0.9118014570888755  | 0.3312378171076474  | 0.3921037334070582 | T | T | T |
| 0.7393668559137693  | -0.0044372001308817 | 0.4977408130970409 | T | T | T |
| 0.0000000120000010  | 0.5000000229999984  | 0.1832499960000007 | F | F | F |
| 0.3333300159999979  | 0.6666700390000031  | 0.2875199960000003 | F | F | F |
| 0.1644398163879637  | 0.8324771635539975  | 0.3918501820841003 | T | T | T |
| -0.0132094278433974 | 0.4940725991409268  | 0.4985991467209258 | T | T | T |
| 0.0000000169999979  | 0.7500000349999993  | 0.1832499960000007 | F | F | F |
| 0.3333300469999969  | 0.9166700999999975  | 0.2875199960000003 | F | F | F |
| 0.1617252560627111  | 0.5817636724675770  | 0.3916238938939324 | T | T | T |
| -0.0096992280618252 | 0.7455942068592901  | 0.4981444140114931 | T | T | T |
| 0.2500000169999979  | 0.7500000349999993  | 0.1832499960000007 | F | F | F |
| 0.0833300469999969  | 0.9166700999999975  | 0.2875199960000003 | F | F | F |
| 0.4125434853663613  | 0.5815078757910600  | 0.3923537389005235 | T | T | T |
| 0.2346430165773480  | 0.7448271327431247  | 0.4989308133571751 | T | T | T |
| 0.2500000120000010  | 0.5000000229999984  | 0.1832499960000007 | F | F | F |
| 0.0833299949999997  | 0.6666700390000031  | 0.2875199960000003 | F | F | F |
| 0.4143672645817028  | 0.8286064459330067  | 0.3955678028287969 | T | T | T |
| 0.2308031029570971  | 0.4908126808691980  | 0.4960095451974991 | T | T | T |
| 0.5000000120000010  | 0.5000000229999984  | 0.1832499960000007 | F | F | F |
| 0.8333299729999979  | 0.6666700390000031  | 0.2875199960000003 | F | F | F |
| 0.6625770759108255  | 0.8315606423943133  | 0.3922893351092203 | T | T | T |
| 0.4829511408326824  | 0.4889223836121858  | 0.5017675757979252 | T | T | T |
| 0.5000000169999979  | 0.7500000349999993  | 0.1832499960000007 | F | F | F |
| 0.8333300039999969  | 0.9166700999999975  | 0.2875199960000003 | F | F | F |
| 0.6625878769197461  | 0.5815582071290490  | 0.3923316801052855 | T | T | T |
| 0.4824750848000292  | 0.7454048942751739  | 0.5014110810678847 | T | T | T |
| 0.7500000169999979  | 0.7500000349999993  | 0.1832499960000007 | F | F | F |
| 0.5833300039999969  | 0.9166700999999975  | 0.2875199960000003 | F | F | F |
| 0.9127012540759900  | 0.5819915330526031  | 0.3919395592837938 | T | T | T |
| 0.7478438641255593  | 0.7493758550789512  | 0.4949011247009047 | T | T | T |
| 0.7500000120000010  | 0.5000000229999984  | 0.1832499960000007 | F | F | F |
| 0.5833299729999979  | 0.6666700390000031  | 0.2875199960000003 | F | F | F |
| 0.9145977410538836  | 0.8326400292504598  | 0.3906329562982817 | T | T | T |



|                    |                    |                    |   |   |   |
|--------------------|--------------------|--------------------|---|---|---|
| 0.7393676156555569 | 0.4947973478446850 | 0.4978255573270229 | T | T | T |
| 0.4932840760789507 | 0.6236586443464759 | 0.5751628894528132 | T | T | T |
| 0.5893237416134293 | 0.6729791425323903 | 0.5902984804054070 | T | T | T |

O@Pt(111)

|                     |                    |                     |
|---------------------|--------------------|---------------------|
| 1.0000000000000000  |                    |                     |
| 11.1501998900999997 | 0.0000000000000000 | 0.0000000000000000  |
| -5.5750999450999998 | 9.6563563621000004 | 0.0000000000000000  |
| 0.0000000000000000  | 0.0000000000000000 | 21.8281002045000001 |

Pt O

64 1

Selective dynamics

Direct

|                     |                    |                    |   |   |   |
|---------------------|--------------------|--------------------|---|---|---|
| 0.0000000000000000  | 0.0000000000000000 | 0.1832499960000007 | F | F | F |
| 0.3333300199999982  | 0.1666700039999967 | 0.2875199960000003 | F | F | F |
| 0.1682334923489040  | 0.3364822572090512 | 0.3940016741117275 | T | T | T |
| 0.0000275589108451  | 0.0000746434674971 | 0.4990488589030985 | T | T | T |
| 0.0000000600000005  | 0.2500000120000010 | 0.1832499960000007 | F | F | F |
| 0.3333300319999992  | 0.4166700270000021 | 0.2875199960000003 | F | F | F |
| 0.1663137936187318  | 0.0831978562152402 | 0.3919198241056049 | T | T | T |
| -0.0025587397890888 | 0.2471305635825599 | 0.4987720729170522 | T | T | T |
| 0.2500000600000005  | 0.2500000120000010 | 0.1832499960000007 | F | F | F |
| 0.0833300099999974  | 0.4166700270000021 | 0.2875199960000003 | F | F | F |
| 0.4163478626379075  | 0.0832944207398028 | 0.3918729187675949 | T | T | T |
| 0.2496702860889053  | 0.2471273899995053 | 0.4987720893676701 | T | T | T |
| 0.2500000000000000  | 0.0000000000000000 | 0.1832499960000007 | F | F | F |
| 0.0833299980000035  | 0.1666700039999967 | 0.2875199960000003 | F | F | F |
| 0.4163539242251743  | 0.3331330925364144 | 0.3918807357448681 | T | T | T |
| 0.2496717460970793  | 0.0026543572634520 | 0.4987664084491580 | T | T | T |
| 0.5000000000000000  | 0.0000000000000000 | 0.1832499960000007 | F | F | F |
| 0.8333299549999964  | 0.1666700039999967 | 0.2875199960000003 | F | F | F |
| 0.6666673674201832  | 0.3333444909664530 | 0.3922034719078846 | T | T | T |
| 0.5021239506282869  | 0.0042684566068976 | 0.4973377342101169 | T | T | T |
| 0.5000000600000005  | 0.2500000120000010 | 0.1832499960000007 | F | F | F |
| 0.8333299699999974  | 0.4166700270000021 | 0.2875199960000003 | F | F | F |
| 0.6669286681470530  | 0.0832920956490810 | 0.3918738811566330 | T | T | T |
| 0.5003215199396142  | 0.2502211650317425 | 0.4985038887663041 | T | T | T |
| 0.7500000600000005  | 0.2500000120000010 | 0.1832499960000007 | F | F | F |
| 0.5833299669999974  | 0.4166700270000021 | 0.2875199960000003 | F | F | F |
| 0.9168666877018907  | 0.0831976530170417 | 0.3919195561231985 | T | T | T |
| 0.7498795075514310  | 0.2502217402356948 | 0.4985038231483220 | T | T | T |
| 0.7500000000000000  | 0.0000000000000000 | 0.1832499960000007 | F | F | F |
| 0.5833299549999964  | 0.1666700039999967 | 0.2875199960000003 | F | F | F |

|                     |                    |                    |   |   |   |
|---------------------|--------------------|--------------------|---|---|---|
| 0.9167643534146721  | 0.3331329843748095 | 0.3918805057143924 | T | T | T |
| 0.7529615075768523  | 0.0026517349302738 | 0.4987668589316755 | T | T | T |
| 0.0000000120000010  | 0.5000000229999984 | 0.1832499960000007 | F | F | F |
| 0.3333300159999979  | 0.6666700390000031 | 0.2875199960000003 | F | F | F |
| 0.1682233658149328  | 0.8318224190054964 | 0.3939981212868577 | T | T | T |
| -0.0041677649163141 | 0.4979804625226803 | 0.4973355065156984 | T | T | T |
| 0.0000000169999979  | 0.7500000349999993 | 0.1832499960000007 | F | F | F |
| 0.3333300469999969  | 0.9166700999999975 | 0.2875199960000003 | F | F | F |
| 0.1669198811426327  | 0.5834964942193038 | 0.3926464714514434 | T | T | T |
| -0.0025735991055668 | 0.7504273441395440 | 0.4987665066174147 | T | T | T |
| 0.2500000169999979  | 0.7500000349999993 | 0.1832499960000007 | F | F | F |
| 0.0833300469999969  | 0.9166700999999975 | 0.2875199960000003 | F | F | F |
| 0.4165594079475348  | 0.5834966275676617 | 0.3926460709843994 | T | T | T |
| 0.2447078065911815  | 0.7553945080859386 | 0.5007182621109062 | T | T | T |
| 0.2500000120000010  | 0.5000000229999984 | 0.1832499960000007 | F | F | F |
| 0.0833299949999997  | 0.6666700390000031 | 0.2875199960000003 | F | F | F |
| 0.4165606870389363  | 0.8331385243626882 | 0.3926491375820045 | T | T | T |
| 0.2447025751601975  | 0.4894250043371277 | 0.5007155675567833 | T | T | T |
| 0.5000000120000010  | 0.5000000229999984 | 0.1832499960000007 | F | F | F |
| 0.8333299729999979  | 0.6666700390000031 | 0.2875199960000003 | F | F | F |
| 0.6635813938512991  | 0.8318210889650289 | 0.3939989559253855 | T | T | T |
| 0.5021281310124267  | 0.4979799255657221 | 0.4973351759749159 | T | T | T |
| 0.5000000169999979  | 0.7500000349999993 | 0.1832499960000007 | F | F | F |
| 0.8333300039999969  | 0.9166700999999975 | 0.2875199960000003 | F | F | F |
| 0.6669284453368535  | 0.5836907714379297 | 0.3918746396686652 | T | T | T |
| 0.5106679451304911  | 0.7553950064996642 | 0.5007176721937507 | T | T | T |
| 0.7500000169999979  | 0.7500000349999993 | 0.1832499960000007 | F | F | F |
| 0.5833300039999969  | 0.9166700999999975 | 0.2875199960000003 | F | F | F |
| 0.9167450460281479  | 0.5836915580713279 | 0.3918734332994245 | T | T | T |
| 0.7529831011858001  | 0.7504278131284803 | 0.4987670039280475 | T | T | T |
| 0.7500000120000010  | 0.5000000229999984 | 0.1832499960000007 | F | F | F |
| 0.5833299729999979  | 0.6666700390000031 | 0.2875199960000003 | F | F | F |
| 0.9168622736066969  | 0.8337422863708165 | 0.3919212613964176 | T | T | T |
| 0.7498818484183897  | 0.4997832555610355 | 0.4985039335281984 | T | T | T |
| 0.3333517738187423  | 0.6667172553713970 | 0.5522644980585737 | T | T | T |

OOH@Pt(111)

1.0000000000000000

11.1501998900999997 0.0000000000000000 0.0000000000000000

-5.5750999450999998 9.6563563621000004 0.0000000000000000

0.0000000000000000 0.0000000000000000 21.8281002045000001

Pt O H

64 2 1

Selective dynamics

Direct

|                     |                     |                    |   |   |   |
|---------------------|---------------------|--------------------|---|---|---|
| 0.0000000000000000  | 0.0000000000000000  | 0.1832499960000007 | F | F | F |
| 0.3333300199999982  | 0.1666700039999967  | 0.2875199960000003 | F | F | F |
| 0.1671244113661301  | 0.3339495447782728  | 0.3939939367128840 | T | T | T |
| -0.0010616685614077 | -0.0024859987027982 | 0.4981419613460783 | T | T | T |
| 0.0000000600000005  | 0.2500000120000010  | 0.1832499960000007 | F | F | F |
| 0.3333300319999992  | 0.4166700270000021  | 0.2875199960000003 | F | F | F |
| 0.1660901135252438  | 0.0822997363079572  | 0.3915459153031907 | T | T | T |
| -0.0025128748519076 | 0.2463141819395041  | 0.4976876482298110 | T | T | T |
| 0.2500000060000005  | 0.2500000120000010  | 0.1832499960000007 | F | F | F |
| 0.0833300099999974  | 0.4166700270000021  | 0.2875199960000003 | F | F | F |
| 0.4161401413502873  | 0.0825265203844430  | 0.3919810593890322 | T | T | T |
| 0.2484712435977835  | 0.2447163278526182  | 0.4972077255625558 | T | T | T |
| 0.2500000000000000  | 0.0000000000000000  | 0.1832499960000007 | F | F | F |
| 0.0833299800000035  | 0.1666700039999967  | 0.2875199960000003 | F | F | F |
| 0.4167821254530824  | 0.3329213206191419  | 0.3920775642209474 | T | T | T |
| 0.2494429935087779  | -0.0020321148864671 | 0.4981093270805421 | T | T | T |
| 0.5000000000000000  | 0.0000000000000000  | 0.1832499960000007 | F | F | F |
| 0.8333299549999964  | 0.1666700039999967  | 0.2875199960000003 | F | F | F |
| 0.6666994509752834  | 0.3329245656734936  | 0.3920804147702340 | T | T | T |
| 0.4997921842228071  | -0.0009354640354642 | 0.4980506927002082 | T | T | T |
| 0.5000000060000005  | 0.2500000120000010  | 0.1832499960000007 | F | F | F |
| 0.8333299669999974  | 0.4166700270000021  | 0.2875199960000003 | F | F | F |
| 0.6666352952099723  | 0.0826181042526578  | 0.3921008924537729 | T | T | T |
| 0.4997682329345500  | 0.2480823139001991  | 0.4980328646431662 | T | T | T |
| 0.7500000060000005  | 0.2500000120000010  | 0.1832499960000007 | F | F | F |
| 0.5833299669999974  | 0.4166700270000021  | 0.2875199960000003 | F | F | F |
| 0.9168150678577313  | 0.0824882304284360  | 0.3917999813933892 | T | T | T |
| 0.7494686795709379  | 0.2486757249894650  | 0.4982432975659449 | T | T | T |
| 0.7500000000000000  | 0.0000000000000000  | 0.1832499960000007 | F | F | F |
| 0.5833299549999964  | 0.1666700039999967  | 0.2875199960000003 | F | F | F |
| 0.9164870328705196  | 0.3326568227803983  | 0.3920675702312931 | T | T | T |
| 0.7496288206999846  | -0.0011669402733437 | 0.4982834152612388 | T | T | T |
| 0.0000000120000010  | 0.5000000229999984  | 0.1832499960000007 | F | F | F |
| 0.3333300159999979  | 0.6666700390000031  | 0.2875199960000003 | F | F | F |
| 0.1660987522032571  | 0.8318806057658897  | 0.3918185541840362 | T | T | T |
| -0.0016893642981973 | 0.4986133959902074  | 0.4981052337202304 | T | T | T |
| 0.0000000169999979  | 0.7500000349999993  | 0.1832499960000007 | F | F | F |
| 0.3333300469999969  | 0.9166700999999975  | 0.2875199960000003 | F | F | F |
| 0.1677517104426674  | 0.5815151932907344  | 0.3945282139890987 | T | T | T |
| -0.0008954473045396 | 0.7484073889973200  | 0.4983156151043124 | T | T | T |
| 0.2500000169999979  | 0.7500000349999993  | 0.1832499960000007 | F | F | F |
| 0.0833300469999969  | 0.9166700999999975  | 0.2875199960000003 | F | F | F |

|                    |                    |                    |   |   |   |
|--------------------|--------------------|--------------------|---|---|---|
| 0.4154297789810494 | 0.5821689736823088 | 0.3931759589465896 | T | T | T |
| 0.2494832015568280 | 0.7501553803518068 | 0.4979191781617691 | T | T | T |
| 0.2500000120000010 | 0.5000000229999984 | 0.1832499960000007 | F | F | F |
| 0.0833299949999997 | 0.6666700390000031 | 0.2875199960000003 | F | F | F |
| 0.4164146871989992 | 0.8327896879800786 | 0.3918375600807349 | T | T | T |
| 0.2496683502805263 | 0.4976792761750046 | 0.5045230827885360 | T | T | T |
| 0.5000000120000010 | 0.5000000229999984 | 0.1832499960000007 | F | F | F |
| 0.8333299729999979 | 0.6666700390000031 | 0.2875199960000003 | F | F | F |
| 0.6669813565738767 | 0.8326589731424214 | 0.3916884608892411 | T | T | T |
| 0.5002931536111216 | 0.4986541078997462 | 0.4981907606869843 | T | T | T |
| 0.5000000169999979 | 0.7500000349999993 | 0.1832499960000007 | F | F | F |
| 0.8333300039999969 | 0.9166700999999975 | 0.2875199960000003 | F | F | F |
| 0.6661362992837637 | 0.5827839137027042 | 0.3921209638214943 | T | T | T |
| 0.5019931686081999 | 0.7517554601946517 | 0.4971494396593057 | T | T | T |
| 0.7500000169999979 | 0.7500000349999993 | 0.1832499960000007 | F | F | F |
| 0.5833300039999969 | 0.9166700999999975 | 0.2875199960000003 | F | F | F |
| 0.9168775839474953 | 0.5826121314164803 | 0.3919027580403918 | T | T | T |
| 0.7500233971972626 | 0.7489933582899658 | 0.4983759520116787 | T | T | T |
| 0.7500000120000010 | 0.5000000229999984 | 0.1832499960000007 | F | F | F |
| 0.5833299729999979 | 0.6666700390000031 | 0.2875199960000003 | F | F | F |
| 0.9165137719164350 | 0.8321659988109874 | 0.3921371846621533 | T | T | T |
| 0.7494042821960362 | 0.4982630030380640 | 0.4983474885332833 | T | T | T |
| 0.2629993677491165 | 0.4923084037135669 | 0.5960428412412734 | T | T | T |
| 0.3939390695850514 | 0.5098492669630478 | 0.6152706114612212 | T | T | T |
| 0.4528332545107008 | 0.6117986354228038 | 0.6166141543161431 | T | T | T |

O<sub>2</sub>@Pt(111)

|                     |                    |                     |
|---------------------|--------------------|---------------------|
| 1.0000000000000000  |                    |                     |
| 11.1501998900999997 | 0.0000000000000000 | 0.0000000000000000  |
| -5.5750999450999998 | 9.6563563621000004 | 0.0000000000000000  |
| 0.0000000000000000  | 0.0000000000000000 | 21.8281002045000001 |

Pt O  
64 2

Selective dynamics

Direct

|                     |                     |                    |   |   |   |
|---------------------|---------------------|--------------------|---|---|---|
| 0.0000000000000000  | 0.0000000000000000  | 0.1832499960000007 | F | F | F |
| 0.3333300199999982  | 0.1666700039999967  | 0.2875199960000003 | F | F | F |
| 0.1675733777492605  | 0.3326443676089819  | 0.3935628135242598 | T | T | T |
| -0.0016728688819271 | -0.0014311348007402 | 0.4992021837461779 | T | T | T |
| 0.0000000060000005  | 0.2500000120000010  | 0.1832499960000007 | F | F | F |
| 0.3333300319999992  | 0.4166700270000021  | 0.2875199960000003 | F | F | F |
| 0.1684737573153095  | 0.0864809559617665  | 0.3952295952729381 | T | T | T |
| -0.0022305331460076 | 0.2498746026627915  | 0.4978477753286896 | T | T | T |

|                     |                     |                    |   |   |   |
|---------------------|---------------------|--------------------|---|---|---|
| 0.2500000060000005  | 0.2500000120000010  | 0.1832499960000007 | F | F | F |
| 0.0833300099999974  | 0.4166700270000021  | 0.2875199960000003 | F | F | F |
| 0.4162047941675828  | 0.0817574358271497  | 0.3912183777789318 | T | T | T |
| 0.2504297142293395  | 0.2509579425140437  | 0.5024138119772089 | T | T | T |
| 0.2500000000000000  | 0.0000000000000000  | 0.1832499960000007 | F | F | F |
| 0.0833299980000035  | 0.1666700039999967  | 0.2875199960000003 | F | F | F |
| 0.4172494387306724  | 0.3326378183334321  | 0.3921013742047624 | T | T | T |
| 0.2502214725828292  | -0.0017156301820249 | 0.4981151965627483 | T | T | T |
| 0.5000000000000000  | 0.0000000000000000  | 0.1832499960000007 | F | F | F |
| 0.8333299549999964  | 0.1666700039999967  | 0.2875199960000003 | F | F | F |
| 0.6681754742947010  | 0.3337196642480157  | 0.3912421427211466 | T | T | T |
| 0.5008319287325111  | -0.0011592356111933 | 0.4980494583260709 | T | T | T |
| 0.5000000060000005  | 0.2500000120000010  | 0.1832499960000007 | F | F | F |
| 0.8333299669999974  | 0.4166700270000021  | 0.2875199960000003 | F | F | F |
| 0.6671581486734136  | 0.0828620912801477  | 0.3920024362225287 | T | T | T |
| 0.5042514953914466  | 0.2458049591327843  | 0.4952137328914223 | T | T | T |
| 0.7500000060000005  | 0.2500000120000010  | 0.1832499960000007 | F | F | F |
| 0.5833299669999974  | 0.4166700270000021  | 0.2875199960000003 | F | F | F |
| 0.9169279119784354  | 0.0829802284875138  | 0.3921573213005966 | T | T | T |
| 0.7513754700115119  | 0.2492740122036602  | 0.4980965650417131 | T | T | T |
| 0.7500000000000000  | 0.0000000000000000  | 0.1832499960000007 | F | F | F |
| 0.5833299549999964  | 0.1666700039999967  | 0.2875199960000003 | F | F | F |
| 0.9175615770076759  | 0.3341530845913508  | 0.3916787753958775 | T | T | T |
| 0.7505142400864016  | -0.0004710634499457 | 0.4987587151982237 | T | T | T |
| 0.0000000120000010  | 0.5000000229999984  | 0.1832499960000007 | F | F | F |
| 0.3333300159999979  | 0.6666700390000031  | 0.2875199960000003 | F | F | F |
| 0.1653882527286811  | 0.8337299939059468  | 0.3918245659112455 | T | T | T |
| -0.0016034075754434 | 0.5008314539380680  | 0.4982779643464159 | T | T | T |
| 0.0000000169999979  | 0.7500000349999993  | 0.1832499960000007 | F | F | F |
| 0.3333300469999969  | 0.9166700999999975  | 0.2875199960000003 | F | F | F |
| 0.1659102777319934  | 0.5840438911261380  | 0.3908358690014990 | T | T | T |
| -0.0005050009801322 | 0.7506225275150775  | 0.4988098883414419 | T | T | T |
| 0.2500000169999979  | 0.7500000349999993  | 0.1832499960000007 | F | F | F |
| 0.0833300469999969  | 0.9166700999999975  | 0.2875199960000003 | F | F | F |
| 0.4173854590517063  | 0.5824392044088293  | 0.3935833177239091 | T | T | T |
| 0.2492096353550196  | 0.7516414038108362  | 0.4982365247536861 | T | T | T |
| 0.2500000120000010  | 0.5000000229999984  | 0.1832499960000007 | F | F | F |
| 0.0833299949999997  | 0.6666700390000031  | 0.2875199960000003 | F | F | F |
| 0.4158465947236457  | 0.8324419530739046  | 0.3916668692113164 | T | T | T |
| 0.2453126059568608  | 0.5049363690271539  | 0.4958976842135653 | T | T | T |
| 0.5000000120000010  | 0.5000000229999984  | 0.1832499960000007 | F | F | F |
| 0.8333299729999979  | 0.6666700390000031  | 0.2875199960000003 | F | F | F |
| 0.6669998031534423  | 0.8330471885920445  | 0.3921604387664219 | T | T | T |
| 0.4995727595949973  | 0.4996245219357950  | 0.5024354868890055 | T | T | T |

|                    |                    |                    |   |   |   |
|--------------------|--------------------|--------------------|---|---|---|
| 0.5000000169999979 | 0.7500000349999993 | 0.1832499960000007 | F | F | F |
| 0.8333300039999969 | 0.9166700999999975 | 0.2875199960000003 | F | F | F |
| 0.6634338693025392 | 0.5814340934336234 | 0.3952965489548056 | T | T | T |
| 0.5001895327081072 | 0.7523660101618108 | 0.4978295666362264 | T | T | T |
| 0.7500000169999979 | 0.7500000349999993 | 0.1832499960000007 | F | F | F |
| 0.5833300039999969 | 0.9166700999999975 | 0.2875199960000003 | F | F | F |
| 0.9161667816584060 | 0.5845293240404991 | 0.3918679272731588 | T | T | T |
| 0.7515111707426215 | 0.7517383377965881 | 0.4992390364728307 | T | T | T |
| 0.7500000120000010 | 0.5000000229999984 | 0.1832499960000007 | F | F | F |
| 0.5833299729999979 | 0.6666700390000003 | 0.2875199960000003 | F | F | F |
| 0.9163640660129428 | 0.8335642561598702 | 0.3920339393539432 | T | T | T |
| 0.7518623504740632 | 0.4998271944727272 | 0.4981973339150361 | T | T | T |
| 0.4361174498814732 | 0.4370031018462388 | 0.5889666312859047 | T | T | T |
| 0.3153017705499083 | 0.3119382627865999 | 0.5889360638282370 | T | T | T |

RuO<sub>2</sub>(110)

1.000000000000000

|                    |                     |                     |
|--------------------|---------------------|---------------------|
| 6.2244000435000002 | 0.0000000000000000  | 0.0000000000000000  |
| 0.0000000000000000 | 12.6898002625000004 | 0.0000000000000000  |
| 0.0000000000000000 | 0.0000000000000000  | 28.3910999297999993 |

O    Ru  
68    32

Selective dynamics

Direct

|                    |                    |                    |   |   |   |
|--------------------|--------------------|--------------------|---|---|---|
| 0.4515300210000035 | 0.2257600020000012 | 0.1056699989999998 | F | F | F |
| 0.4515300210000035 | 0.4757600209999993 | 0.2174100060000015 | F | F | F |
| 0.4515300210000035 | 0.2257600020000012 | 0.3291500039999988 | F | F | F |
| 0.4515300210000035 | 0.4757624720757741 | 0.4394139862592512 | T | T | T |
| 0.4515300210000035 | 0.2257608099211764 | 0.5553006718644905 | T | T | T |
| 0.2015300019999984 | 0.1283999979999990 | 0.1738899970000034 | F | F | F |
| 0.2015300019999984 | 0.3783999890000018 | 0.2856299780000029 | F | F | F |
| 0.2007094591219178 | 0.1288010415544830 | 0.3982173059408936 | T | T | T |
| 0.2053842734361825 | 0.3804117920359218 | 0.5113100092264762 | T | T | T |
| 0.4515300210000035 | 0.4757600209999993 | 0.1303700050000032 | F | F | F |
| 0.4515300210000035 | 0.2257600020000012 | 0.2421100030000005 | F | F | F |
| 0.4515300210000035 | 0.4757597913140785 | 0.3543714691220153 | T | T | T |
| 0.4515300210000035 | 0.2257621300000819 | 0.4668192617857423 | T | T | T |
| 0.2015300019999984 | 0.3231300099999999 | 0.1738899970000034 | F | F | F |
| 0.2015300019999984 | 0.0731299959999987 | 0.2856299780000029 | F | F | F |
| 0.2007080826075016 | 0.3227225797255421 | 0.3982155256854639 | T | T | T |
| 0.2053855078460810 | 0.0711085235657759 | 0.5113105336955470 | T | T | T |
| 0.9515299830000004 | 0.4757600209999993 | 0.2174100060000015 | F | F | F |
| 0.9515299830000004 | 0.2257600020000012 | 0.3291500039999988 | F | F | F |

|                    |                    |                    |   |   |   |
|--------------------|--------------------|--------------------|---|---|---|
| 0.9515299830000004 | 0.4757632449560734 | 0.4442851832534890 | T | T | T |
| 0.9515299830000004 | 0.2257598042049105 | 0.5491747399129489 | T | T | T |
| 0.7015300019999984 | 0.1283999979999990 | 0.1738899970000034 | F | F | F |
| 0.7015300019999984 | 0.3783999890000018 | 0.2856299780000029 | F | F | F |
| 0.7023505448780790 | 0.1288010415544830 | 0.3982173059408936 | T | T | T |
| 0.6976757305638142 | 0.3804117920359218 | 0.5113100092264762 | T | T | T |
| 0.9515299830000004 | 0.4757600209999993 | 0.1303700050000032 | F | F | F |
| 0.9515299830000004 | 0.2257600020000012 | 0.2421100030000005 | F | F | F |
| 0.9515299830000004 | 0.4757595573780621 | 0.3541268332510050 | T | T | T |
| 0.9515299830000004 | 0.2257620341004444 | 0.4669918382546058 | T | T | T |
| 0.9515299830000004 | 0.4757595370677710 | 0.5782916437163689 | T | T | T |
| 0.7015300019999984 | 0.3231300099999999 | 0.1738899970000034 | F | F | F |
| 0.7015300019999984 | 0.0731299959999987 | 0.2856299780000029 | F | F | F |
| 0.7023519213924954 | 0.3227225797255421 | 0.3982155256854639 | T | T | T |
| 0.6976744961539159 | 0.0711085235657759 | 0.5113105336955470 | T | T | T |
| 0.4515300210000035 | 0.7257599830000032 | 0.1056699989999998 | F | F | F |
| 0.4515300210000035 | 0.9757599830000032 | 0.2174100060000015 | F | F | F |
| 0.4515300210000035 | 0.7257599830000032 | 0.3291500039999988 | F | F | F |
| 0.4515300210000035 | 0.9757624340757779 | 0.4394139862592512 | T | T | T |
| 0.4515300210000035 | 0.7257607909211783 | 0.5553006718644905 | T | T | T |
| 0.2015300019999984 | 0.6284000260000013 | 0.1738899970000034 | F | F | F |
| 0.2015300019999984 | 0.8784000260000013 | 0.2856299780000029 | F | F | F |
| 0.2007094591219178 | 0.6288010695544850 | 0.3982173059408936 | T | T | T |
| 0.2053842734361825 | 0.8804118290359212 | 0.5113100092264762 | T | T | T |
| 0.4515300210000035 | 0.9757599830000032 | 0.1303700050000032 | F | F | F |
| 0.4515300210000035 | 0.7257599830000032 | 0.2421100030000005 | F | F | F |
| 0.4515300210000035 | 0.9757597533140824 | 0.3543714691220153 | T | T | T |
| 0.4515300210000035 | 0.7257621110000839 | 0.4668192617857423 | T | T | T |
| 0.2015300019999984 | 0.8231300099999999 | 0.1738899970000034 | F | F | F |
| 0.2015300019999984 | 0.5731300099999999 | 0.2856299780000029 | F | F | F |
| 0.2007080826075016 | 0.8227225797255420 | 0.3982155256854639 | T | T | T |
| 0.2053855078460810 | 0.5711085375657766 | 0.5113105336955470 | T | T | T |
| 0.9515299830000004 | 0.9757599830000032 | 0.2174100060000015 | F | F | F |
| 0.9515299830000004 | 0.7257599830000032 | 0.3291500039999988 | F | F | F |
| 0.9515299830000004 | 0.9757632069560771 | 0.4442851832534890 | T | T | T |
| 0.9515299830000004 | 0.7257597852049126 | 0.5491747399129489 | T | T | T |
| 0.7015300019999984 | 0.6284000260000013 | 0.1738899970000034 | F | F | F |
| 0.7015300019999984 | 0.8784000260000013 | 0.2856299780000029 | F | F | F |
| 0.7023505448780790 | 0.6288010695544850 | 0.3982173059408936 | T | T | T |
| 0.6976757305638142 | 0.8804118290359212 | 0.5113100092264762 | T | T | T |
| 0.9515299830000004 | 0.9757599830000032 | 0.1303700050000032 | F | F | F |
| 0.9515299830000004 | 0.7257599830000032 | 0.2421100030000005 | F | F | F |
| 0.9515299830000004 | 0.9757595193780656 | 0.3541268332510050 | T | T | T |
| 0.9515299830000004 | 0.7257620151004465 | 0.4669918382546058 | T | T | T |

|                    |                    |                    |   |   |   |
|--------------------|--------------------|--------------------|---|---|---|
| 0.9515299830000004 | 0.9757594990677748 | 0.5782916437163689 | T | T | T |
| 0.7015300019999984 | 0.8231300099999999 | 0.1738899970000034 | F | F | F |
| 0.7015300019999984 | 0.5731300099999999 | 0.2856299780000029 | F | F | F |
| 0.7023519213924954 | 0.8227225797255420 | 0.3982155256854639 | T | T | T |
| 0.6976744961539159 | 0.5711085375657766 | 0.5113105336955470 | T | T | T |
| 0.2015300019999984 | 0.4757600209999993 | 0.1738899970000034 | F | F | F |
| 0.2015300019999984 | 0.2257600020000012 | 0.2856299780000029 | F | F | F |
| 0.1967076299651749 | 0.4757621499384360 | 0.3980497395078793 | T | T | T |
| 0.2064551721889062 | 0.2257610285191779 | 0.5134889219013860 | T | T | T |
| 0.4515300210000035 | 0.2257600020000012 | 0.1738899970000034 | F | F | F |
| 0.4515300210000035 | 0.4757600209999993 | 0.2856299780000029 | F | F | F |
| 0.4515300210000035 | 0.2257610100022569 | 0.3982752880717050 | T | T | T |
| 0.4515300210000035 | 0.4757593288256493 | 0.5050401513987834 | T | T | T |
| 0.7015300019999984 | 0.4757600209999993 | 0.1738899970000034 | F | F | F |
| 0.7015300019999984 | 0.2257600020000012 | 0.2856299780000029 | F | F | F |
| 0.7063523740348220 | 0.4757621499384360 | 0.3980497395078793 | T | T | T |
| 0.6966048318110908 | 0.2257610285191779 | 0.5134889219013860 | T | T | T |
| 0.9515299830000004 | 0.2257600020000012 | 0.1738899970000034 | F | F | F |
| 0.9515299830000004 | 0.4757600209999993 | 0.2856299780000029 | F | F | F |
| 0.9515299830000004 | 0.2257609031864704 | 0.3987644959387591 | T | T | T |
| 0.9515299830000004 | 0.4757597431132219 | 0.5181404160715474 | T | T | T |
| 0.2015300019999984 | 0.9757599830000032 | 0.1738899970000034 | F | F | F |
| 0.2015300019999984 | 0.7257599830000032 | 0.2856299780000029 | F | F | F |
| 0.1967076299651749 | 0.9757621119384401 | 0.3980497395078793 | T | T | T |
| 0.2064551721889062 | 0.7257610095191795 | 0.5134889219013860 | T | T | T |
| 0.4515300210000035 | 0.7257599830000032 | 0.1738899970000034 | F | F | F |
| 0.4515300210000035 | 0.9757599830000032 | 0.2856299780000029 | F | F | F |
| 0.4515300210000035 | 0.7257609910022590 | 0.3982752880717050 | T | T | T |
| 0.4515300210000035 | 0.9757592908256534 | 0.5050401513987834 | T | T | T |
| 0.7015300019999984 | 0.9757599830000032 | 0.1738899970000034 | F | F | F |
| 0.7015300019999984 | 0.7257599830000032 | 0.2856299780000029 | F | F | F |
| 0.7063523740348220 | 0.9757621119384401 | 0.3980497395078793 | T | T | T |
| 0.6966048318110908 | 0.7257610095191795 | 0.5134889219013860 | T | T | T |
| 0.9515299830000004 | 0.7257599830000032 | 0.1738899970000034 | F | F | F |
| 0.9515299830000004 | 0.9757599830000032 | 0.2856299780000029 | F | F | F |
| 0.9515299830000004 | 0.7257608841864723 | 0.3987644959387591 | T | T | T |
| 0.9515299830000004 | 0.9757597051132260 | 0.5181404160715474 | T | T | T |

OH@RuO<sub>2</sub>(110)

1.0000000000000000

|                    |                     |                     |
|--------------------|---------------------|---------------------|
| 6.2244000435000002 | 0.0000000000000000  | 0.0000000000000000  |
| 0.0000000000000000 | 12.6898002625000004 | 0.0000000000000000  |
| 0.0000000000000000 | 0.0000000000000000  | 28.3910999297999993 |



O Ru H  
69 32 1

Selective dynamics

Direct

|                    |                    |                    |   |   |   |
|--------------------|--------------------|--------------------|---|---|---|
| 0.4515300210000035 | 0.2257600020000012 | 0.1056699989999998 | F | F | F |
| 0.4515300210000035 | 0.4757600209999993 | 0.2174100060000015 | F | F | F |
| 0.4515300210000035 | 0.2257600020000012 | 0.3291500039999988 | F | F | F |
| 0.4515053994605225 | 0.4782274377954074 | 0.4414854004199247 | T | T | T |
| 0.4517403924073283 | 0.2340607676466429 | 0.5551604450486890 | T | T | T |
| 0.2015300019999984 | 0.1283999979999990 | 0.1738899970000034 | F | F | F |
| 0.2015300019999984 | 0.3783999890000018 | 0.2856299780000029 | F | F | F |
| 0.2003651023273726 | 0.1288691724212949 | 0.3980196830263582 | T | T | T |
| 0.2023968404682749 | 0.3796126235471893 | 0.5081471318792694 | T | T | T |
| 0.4515300210000035 | 0.4757600209999993 | 0.1303700050000032 | F | F | F |
| 0.4515300210000035 | 0.2257600020000012 | 0.2421100030000005 | F | F | F |
| 0.4515317731338160 | 0.4757102309580192 | 0.3547672209324957 | T | T | T |
| 0.4515990879711639 | 0.2237208065380436 | 0.4662255111409881 | T | T | T |
| 0.2015300019999984 | 0.3231300099999999 | 0.1738899970000034 | F | F | F |
| 0.2015300019999984 | 0.0731299959999987 | 0.2856299780000029 | F | F | F |
| 0.2010975695827417 | 0.3230043325467122 | 0.3982746181235156 | T | T | T |
| 0.2066758519146771 | 0.0711042725971364 | 0.5125974713457307 | T | T | T |
| 0.9515299830000004 | 0.4757600209999993 | 0.2174100060000015 | F | F | F |
| 0.9515299830000004 | 0.2257600020000012 | 0.3291500039999988 | F | F | F |
| 0.9515200365974590 | 0.4772450641204337 | 0.4436867234522920 | T | T | T |
| 0.9516628145229583 | 0.2261494848141997 | 0.5484868496321207 | T | T | T |
| 0.7015300019999984 | 0.1283999979999990 | 0.1738899970000034 | F | F | F |
| 0.7015300019999984 | 0.3783999890000018 | 0.2856299780000029 | F | F | F |
| 0.7028173816460976 | 0.1289169134936216 | 0.3980302340689755 | T | T | T |
| 0.7010130671655702 | 0.3795484557131688 | 0.5080788630928393 | T | T | T |
| 0.9515299830000004 | 0.4757600209999993 | 0.1303700050000032 | F | F | F |
| 0.9515299830000004 | 0.2257600020000012 | 0.2421100030000005 | F | F | F |
| 0.9515076619216818 | 0.4760981862461775 | 0.3546143299149050 | T | T | T |
| 0.9517401595098303 | 0.2244938060628327 | 0.4667333805296526 | T | T | T |
| 0.9508452497372050 | 0.4709601327687903 | 0.5766505777515010 | T | T | T |
| 0.7015300019999984 | 0.3231300099999999 | 0.1738899970000034 | F | F | F |
| 0.7015300019999984 | 0.0731299959999987 | 0.2856299780000029 | F | F | F |
| 0.7020753846739078 | 0.3229557099004970 | 0.3982705731832034 | T | T | T |
| 0.6966274392044187 | 0.0711291251350832 | 0.5125690614409877 | T | T | T |
| 0.4515300210000035 | 0.7257599830000032 | 0.1056699989999998 | F | F | F |
| 0.4515300210000035 | 0.9757599830000032 | 0.2174100060000015 | F | F | F |
| 0.4515300210000035 | 0.7257599830000032 | 0.3291500039999988 | F | F | F |
| 0.4515876388754324 | 0.9759303115819140 | 0.4398214448950713 | T | T | T |
| 0.4516894939049689 | 0.7259588075369980 | 0.5542001876656976 | T | T | T |
| 0.2015300019999984 | 0.6284000260000013 | 0.1738899970000034 | F | F | F |

|                    |                    |                    |   |   |   |
|--------------------|--------------------|--------------------|---|---|---|
| 0.2015300019999984 | 0.8784000260000013 | 0.2856299780000029 | F | F | F |
| 0.2012820325165978 | 0.6290731603718225 | 0.3979827833672688 | T | T | T |
| 0.2042571785656410 | 0.8808380562642009 | 0.5119889735475911 | T | T | T |
| 0.4515300210000035 | 0.9757599830000032 | 0.1303700050000032 | F | F | F |
| 0.4515300210000035 | 0.7257599830000032 | 0.2421100030000005 | F | F | F |
| 0.4515860798965031 | 0.9757022945189940 | 0.3545328160995427 | T | T | T |
| 0.4515496986249942 | 0.7266462482925438 | 0.4665194296723619 | T | T | T |
| 0.2015300019999984 | 0.8231300099999999 | 0.1738899970000034 | F | F | F |
| 0.2015300019999984 | 0.5731300099999999 | 0.2856299780000029 | F | F | F |
| 0.2003061289229839 | 0.8230478906077365 | 0.3982622308444151 | T | T | T |
| 0.2040349191815430 | 0.5715243223035062 | 0.5109405781618208 | T | T | T |
| 0.9515299830000004 | 0.9757599830000032 | 0.2174100060000015 | F | F | F |
| 0.9515299830000004 | 0.7257599830000032 | 0.3291500039999988 | F | F | F |
| 0.9515934378452731 | 0.9764561690510781 | 0.4446235131881631 | T | T | T |
| 0.9515917104724618 | 0.7267177443496248 | 0.5489886615113713 | T | T | T |
| 0.7015300019999984 | 0.6284000260000013 | 0.1738899970000034 | F | F | F |
| 0.7015300019999984 | 0.8784000260000013 | 0.2856299780000029 | F | F | F |
| 0.7018068095144753 | 0.6291284557509985 | 0.3979900555016836 | T | T | T |
| 0.6990132391986799 | 0.8808251380403774 | 0.5119638377619369 | T | T | T |
| 0.9515299830000004 | 0.9757599830000032 | 0.1303700050000032 | F | F | F |
| 0.9515299830000004 | 0.7257599830000032 | 0.2421100030000005 | F | F | F |
| 0.9515629971473742 | 0.9758399479989092 | 0.3543136047708499 | T | T | T |
| 0.9517573836020283 | 0.7255039854139710 | 0.4666608501377711 | T | T | T |
| 0.9514861479848840 | 0.9773281888014715 | 0.5793529108491013 | T | T | T |
| 0.7015300019999984 | 0.8231300099999999 | 0.1738899970000034 | F | F | F |
| 0.7015300019999984 | 0.5731300099999999 | 0.2856299780000029 | F | F | F |
| 0.7027997112079164 | 0.8230023755065218 | 0.3982790696899194 | T | T | T |
| 0.6993695154114375 | 0.5715596674480602 | 0.5107874121090396 | T | T | T |
| 0.4522572107834441 | 0.4653771025315770 | 0.5779713329364877 | T | T | T |
| 0.2015300019999984 | 0.4757600209999993 | 0.1738899970000034 | F | F | F |
| 0.2015300019999984 | 0.2257600020000012 | 0.2856299780000029 | F | F | F |
| 0.1999281955277855 | 0.4759273915621293 | 0.3986651821061558 | T | T | T |
| 0.2066992496833210 | 0.2256095942667645 | 0.5126238027193030 | T | T | T |
| 0.4515300210000035 | 0.2257600020000012 | 0.1738899970000034 | F | F | F |
| 0.4515300210000035 | 0.4757600209999993 | 0.2856299780000029 | F | F | F |
| 0.4515477188272718 | 0.2257338838031828 | 0.3979926207603490 | T | T | T |
| 0.4517912492091263 | 0.4756084423244049 | 0.5111428987414491 | T | T | T |
| 0.7015300019999984 | 0.4757600209999993 | 0.1738899970000034 | F | F | F |
| 0.7015300019999984 | 0.2257600020000012 | 0.2856299780000029 | F | F | F |
| 0.7030975983986423 | 0.4759326506832566 | 0.3986663487744990 | T | T | T |
| 0.6967200663740477 | 0.2256126093690023 | 0.5125970462804199 | T | T | T |
| 0.9515299830000004 | 0.2257600020000012 | 0.1738899970000034 | F | F | F |
| 0.9515299830000004 | 0.4757600209999993 | 0.2856299780000029 | F | F | F |
| 0.9516240139471642 | 0.2259888802146870 | 0.3983645921138350 | T | T | T |

|                    |                    |                    |   |   |   |
|--------------------|--------------------|--------------------|---|---|---|
| 0.9517349139132402 | 0.4750197243561424 | 0.5168131828432495 | T | T | T |
| 0.2015300019999984 | 0.9757599830000032 | 0.1738899970000034 | F | F | F |
| 0.2015300019999984 | 0.7257599830000032 | 0.2856299780000029 | F | F | F |
| 0.1966179537689736 | 0.9760164987842828 | 0.3984045928268246 | T | T | T |
| 0.2059120642561954 | 0.7252634423218632 | 0.5130554535872781 | T | T | T |
| 0.4515300210000035 | 0.7257599830000032 | 0.1738899970000034 | F | F | F |
| 0.4515300210000035 | 0.9757599830000032 | 0.2856299780000029 | F | F | F |
| 0.4515110688108052 | 0.7261799712917482 | 0.3981791294382349 | T | T | T |
| 0.4516279227548306 | 0.9756123540010615 | 0.5054936934905340 | T | T | T |
| 0.7015300019999984 | 0.9757599830000032 | 0.1738899970000034 | F | F | F |
| 0.7015300019999984 | 0.7257599830000032 | 0.2856299780000029 | F | F | F |
| 0.7065578975306461 | 0.9760169538073092 | 0.3984078517745003 | T | T | T |
| 0.6974036450363900 | 0.7252691343303019 | 0.5130019749791782 | T | T | T |
| 0.9515299830000004 | 0.7257599830000032 | 0.1738899970000034 | F | F | F |
| 0.9515299830000004 | 0.9757599830000032 | 0.2856299780000029 | F | F | F |
| 0.9515799219709246 | 0.7258350658029954 | 0.3984575266147006 | T | T | T |
| 0.9516166416798061 | 0.9756987871148268 | 0.5192077974516061 | T | T | T |
| 0.4538078087735352 | 0.3909669960104047 | 0.5880533599589222 | T | T | T |

**O@RuO<sub>2</sub>(110)**

1.0000000000000000

|                    |                     |                     |
|--------------------|---------------------|---------------------|
| 6.2244000435000002 | 0.0000000000000000  | 0.0000000000000000  |
| 0.0000000000000000 | 12.6898002625000004 | 0.0000000000000000  |
| 0.0000000000000000 | 0.0000000000000000  | 28.3910999297999993 |

O    Ru  
69    32

**Selective dynamics**

**Direct**

|                    |                    |                    |   |   |   |
|--------------------|--------------------|--------------------|---|---|---|
| 0.4515300210000035 | 0.2257600020000012 | 0.1056699989999998 | F | F | F |
| 0.4515300210000035 | 0.4757600209999993 | 0.2174100060000015 | F | F | F |
| 0.4515300210000035 | 0.2257600020000012 | 0.3291500039999988 | F | F | F |
| 0.4516641475529514 | 0.4757785331468226 | 0.4429915726378953 | T | T | T |
| 0.4516594683975099 | 0.2281963542989857 | 0.5543822925355691 | T | T | T |
| 0.2015300019999984 | 0.1283999979999990 | 0.1738899970000034 | F | F | F |
| 0.2015300019999984 | 0.3783999890000018 | 0.2856299780000029 | F | F | F |
| 0.2002470150630714 | 0.1287168026885649 | 0.3980307558455455 | T | T | T |
| 0.2035115395350563 | 0.3798116445657952 | 0.5091319468644941 | T | T | T |
| 0.4515300210000035 | 0.4757600209999993 | 0.1303700050000032 | F | F | F |
| 0.4515300210000035 | 0.2257600020000012 | 0.2421100030000005 | F | F | F |
| 0.4516165133978299 | 0.4758034913259199 | 0.3548133850901184 | T | T | T |
| 0.4515731173899795 | 0.2231042284289257 | 0.4663196672149307 | T | T | T |
| 0.2015300019999984 | 0.3231300099999999 | 0.1738899970000034 | F | F | F |
| 0.2015300019999984 | 0.0731299959999987 | 0.2856299780000029 | F | F | F |

|                    |                    |                    |   |   |   |
|--------------------|--------------------|--------------------|---|---|---|
| 0.2022368461949576 | 0.3228125698741390 | 0.3982184413516279 | T | T | T |
| 0.2050138328434138 | 0.0706883123088853 | 0.5120363353393426 | T | T | T |
| 0.9515299830000004 | 0.4757600209999993 | 0.2174100060000015 | F | F | F |
| 0.9515299830000004 | 0.2257600020000012 | 0.3291500039999988 | F | F | F |
| 0.9516714721802674 | 0.4756696579541424 | 0.4433076277928661 | T | T | T |
| 0.9515997738833977 | 0.2249299879594532 | 0.5486944377554139 | T | T | T |
| 0.7015300019999984 | 0.1283999979999990 | 0.1738899970000034 | F | F | F |
| 0.7015300019999984 | 0.3783999890000018 | 0.2856299780000029 | F | F | F |
| 0.7029783165852248 | 0.1287384626454744 | 0.3980428911168254 | T | T | T |
| 0.6996590372019478 | 0.3797675272136986 | 0.5090000124837334 | T | T | T |
| 0.9515299830000004 | 0.4757600209999993 | 0.1303700050000032 | F | F | F |
| 0.9515299830000004 | 0.2257600020000012 | 0.2421100030000005 | F | F | F |
| 0.9515725638149565 | 0.4757502224707202 | 0.3546441215761479 | T | T | T |
| 0.9517179192606754 | 0.2259782955506385 | 0.4666433471419686 | T | T | T |
| 0.9508779977635043 | 0.4756011297365838 | 0.5752785747331578 | T | T | T |
| 0.7015300019999984 | 0.3231300099999999 | 0.1738899970000034 | F | F | F |
| 0.7015300019999984 | 0.0731299959999987 | 0.2856299780000029 | F | F | F |
| 0.7009787912431176 | 0.3227781280366298 | 0.3982328579095067 | T | T | T |
| 0.6982134093719298 | 0.0707053725711484 | 0.5120047844028830 | T | T | T |
| 0.4515300210000035 | 0.7257599830000032 | 0.1056699989999998 | F | F | F |
| 0.4515300210000035 | 0.9757599830000032 | 0.2174100060000015 | F | F | F |
| 0.4515300210000035 | 0.7257599830000032 | 0.3291500039999988 | F | F | F |
| 0.4515762387932843 | 0.9757890679406269 | 0.4396227445569579 | T | T | T |
| 0.4516653010736454 | 0.7232437046850786 | 0.5543418647568994 | T | T | T |
| 0.2015300019999984 | 0.6284000260000013 | 0.1738899970000034 | F | F | F |
| 0.2015300019999984 | 0.8784000260000013 | 0.2856299780000029 | F | F | F |
| 0.2021907003941889 | 0.6287410467205343 | 0.3982320294873622 | T | T | T |
| 0.2050527872080653 | 0.8808677096072720 | 0.5120410583846026 | T | T | T |
| 0.4515300210000035 | 0.9757599830000032 | 0.1303700050000032 | F | F | F |
| 0.4515300210000035 | 0.7257599830000032 | 0.2421100030000005 | F | F | F |
| 0.4515851539377566 | 0.9757853892187861 | 0.3544289913265865 | T | T | T |
| 0.4515748164739638 | 0.7284793934923932 | 0.4663142133648210 | T | T | T |
| 0.2015300019999984 | 0.8231300099999999 | 0.1738899970000034 | F | F | F |
| 0.2015300019999984 | 0.5731300099999999 | 0.2856299780000029 | F | F | F |
| 0.2002775329245638 | 0.8228483098193821 | 0.3980105089796447 | T | T | T |
| 0.2028440730969662 | 0.5717890956010889 | 0.5089429941091994 | T | T | T |
| 0.9515299830000004 | 0.9757599830000032 | 0.2174100060000015 | F | F | F |
| 0.9515299830000004 | 0.7257599830000032 | 0.3291500039999988 | F | F | F |
| 0.9515959923554768 | 0.9757822028290571 | 0.4444433358452833 | T | T | T |
| 0.9516025567583950 | 0.7266417228373067 | 0.5486869094749188 | T | T | T |
| 0.7015300019999984 | 0.6284000260000013 | 0.1738899970000034 | F | F | F |
| 0.7015300019999984 | 0.8784000260000013 | 0.2856299780000029 | F | F | F |
| 0.7010324911028849 | 0.6287750819934385 | 0.3982463003254998 | T | T | T |
| 0.6981766154605630 | 0.8808519255765455 | 0.5120084775195858 | T | T | T |

|                    |                    |                    |   |   |   |
|--------------------|--------------------|--------------------|---|---|---|
| 0.9515299830000004 | 0.9757599830000032 | 0.1303700050000032 | F | F | F |
| 0.9515299830000004 | 0.7257599830000032 | 0.2421100030000005 | F | F | F |
| 0.9515600310912660 | 0.9757769031827414 | 0.3542238298037196 | T | T | T |
| 0.9517225899767308 | 0.7257339044763569 | 0.4666148585047617 | T | T | T |
| 0.9514483886324108 | 0.9757516452140366 | 0.5789916045293542 | T | T | T |
| 0.7015300019999984 | 0.8231300099999999 | 0.1738899970000034 | F | F | F |
| 0.7015300019999984 | 0.5731300099999999 | 0.2856299780000029 | F | F | F |
| 0.7029480290629788 | 0.8228261458342709 | 0.3980223629902055 | T | T | T |
| 0.7003286276677013 | 0.5718347221443518 | 0.5088097950665393 | T | T | T |
| 0.4526169008696466 | 0.4771604501647193 | 0.5761827979415576 | T | T | T |
| 0.2015300019999984 | 0.4757600209999993 | 0.1738899970000034 | F | F | F |
| 0.2015300019999984 | 0.2257600020000012 | 0.2856299780000029 | F | F | F |
| 0.2014799930088265 | 0.4757745475088629 | 0.3988242746887883 | T | T | T |
| 0.2066047090393911 | 0.2252458467375761 | 0.5127568365513716 | T | T | T |
| 0.4515300210000035 | 0.2257600020000012 | 0.1738899970000034 | F | F | F |
| 0.4515300210000035 | 0.4757600209999993 | 0.2856299780000029 | F | F | F |
| 0.4515814395505031 | 0.2254544500393156 | 0.3980353221228111 | T | T | T |
| 0.4515521189839632 | 0.4757718054825205 | 0.5163767075374329 | T | T | T |
| 0.7015300019999984 | 0.4757600209999993 | 0.1738899970000034 | F | F | F |
| 0.7015300019999984 | 0.2257600020000012 | 0.2856299780000029 | F | F | F |
| 0.7017833053094521 | 0.4757746816541413 | 0.3988230475602734 | T | T | T |
| 0.6966892907630137 | 0.2252686936580072 | 0.5127219331011007 | T | T | T |
| 0.9515299830000004 | 0.2257600020000012 | 0.1738899970000034 | F | F | F |
| 0.9515299830000004 | 0.4757600209999993 | 0.2856299780000029 | F | F | F |
| 0.9516258259219387 | 0.2260493946989819 | 0.3984170496351464 | T | T | T |
| 0.9514899777332740 | 0.4758793412740635 | 0.5152738632364811 | T | T | T |
| 0.2015300019999984 | 0.9757599830000032 | 0.1738899970000034 | F | F | F |
| 0.2015300019999984 | 0.7257599830000032 | 0.2856299780000029 | F | F | F |
| 0.1965399794019974 | 0.9757817981790640 | 0.3982571678018199 | T | T | T |
| 0.2065693498193052 | 0.7263023205788940 | 0.5127355705931319 | T | T | T |
| 0.4515300210000035 | 0.7257599830000032 | 0.1738899970000034 | F | F | F |
| 0.4515300210000035 | 0.9757599830000032 | 0.2856299780000029 | F | F | F |
| 0.4515829559811110 | 0.7260904069442304 | 0.3980356591455061 | T | T | T |
| 0.4516172049460437 | 0.9757678031027447 | 0.5053418657222980 | T | T | T |
| 0.7015300019999984 | 0.9757599830000032 | 0.1738899970000034 | F | F | F |
| 0.7015300019999984 | 0.7257599830000032 | 0.2856299780000029 | F | F | F |
| 0.7066262176628085 | 0.9757813525835995 | 0.3982588838892754 | T | T | T |
| 0.6967330875797136 | 0.7262813963671111 | 0.5127005865011107 | T | T | T |
| 0.9515299830000004 | 0.7257599830000032 | 0.1738899970000034 | F | F | F |
| 0.9515299830000004 | 0.9757599830000032 | 0.2856299780000029 | F | F | F |
| 0.9516277282568589 | 0.7255328009639274 | 0.3983914425745526 | T | T | T |
| 0.9515956182626266 | 0.9757757715523584 | 0.5188101226573532 | T | T | T |

OOH@RuO<sub>2</sub>(110)

1.0000000000000000

|                    |                    |                     |
|--------------------|--------------------|---------------------|
| 6.2244000435000002 | 0.0000000000000000 | 0.0000000000000000  |
| 0.0000000000000000 | 12.689800262500004 | 0.0000000000000000  |
| 0.0000000000000000 | 0.0000000000000000 | 28.3910999297999993 |

|    |    |   |
|----|----|---|
| O  | Ru | H |
| 70 | 32 | 1 |

Selective dynamics

Direct

|                    |                    |                    |   |   |   |
|--------------------|--------------------|--------------------|---|---|---|
| 0.4515300210000035 | 0.2257600020000012 | 0.1056699989999998 | F | F | F |
| 0.4515300210000035 | 0.4757600209999993 | 0.2174100060000015 | F | F | F |
| 0.4515300210000035 | 0.2257600020000012 | 0.3291500039999988 | F | F | F |
| 0.4526883375822225 | 0.4750060095647191 | 0.4417457103984975 | T | T | T |
| 0.4504175023188746 | 0.2241244588213442 | 0.5546193797651017 | T | T | T |
| 0.2015300019999984 | 0.1283999979999990 | 0.1738899970000034 | F | F | F |
| 0.2015300019999984 | 0.3783999890000018 | 0.2856299780000029 | F | F | F |
| 0.2000939716751823 | 0.1281244820785564 | 0.3979607212765182 | T | T | T |
| 0.1988750905558019 | 0.3760746751253919 | 0.5091093481917575 | T | T | T |
| 0.4515300210000035 | 0.4757600209999993 | 0.1303700050000032 | F | F | F |
| 0.4515300210000035 | 0.2257600020000012 | 0.2421100030000005 | F | F | F |
| 0.4516006148754476 | 0.4749538822934841 | 0.3547676218635968 | T | T | T |
| 0.4510458765915065 | 0.2222992351968896 | 0.4665048064708529 | T | T | T |
| 0.2015300019999984 | 0.3231300099999999 | 0.1738899970000034 | F | F | F |
| 0.2015300019999984 | 0.0731299959999987 | 0.2856299780000029 | F | F | F |
| 0.2006939711829611 | 0.3216893948182018 | 0.3984499761378065 | T | T | T |
| 0.2045307027826661 | 0.0685953225835160 | 0.5118752405888731 | T | T | T |
| 0.9515299830000004 | 0.4757600209999993 | 0.2174100060000015 | F | F | F |
| 0.9515299830000004 | 0.2257600020000012 | 0.3291500039999988 | F | F | F |
| 0.9523925947230503 | 0.4756068133659359 | 0.4436765601202562 | T | T | T |
| 0.9500650956614357 | 0.2224315345141069 | 0.5490408360351715 | T | T | T |
| 0.7015300019999984 | 0.1283999979999990 | 0.1738899970000034 | F | F | F |
| 0.7015300019999984 | 0.3783999890000018 | 0.2856299780000029 | F | F | F |
| 0.7021365666326993 | 0.1276479758747965 | 0.3978990690036923 | T | T | T |
| 0.7008482459824190 | 0.3779146355194526 | 0.5089182181632109 | T | T | T |
| 0.9515299830000004 | 0.4757600209999993 | 0.1303700050000032 | F | F | F |
| 0.9515299830000004 | 0.2257600020000012 | 0.2421100030000005 | F | F | F |
| 0.9519694868598648 | 0.4750003111120993 | 0.3546775461474151 | T | T | T |
| 0.9498821072635055 | 0.2224845369774607 | 0.4667379658321320 | T | T | T |
| 0.9673964916566256 | 0.4711699588579950 | 0.5768638367564954 | T | T | T |
| 0.7015300019999984 | 0.3231300099999999 | 0.1738899970000034 | F | F | F |
| 0.7015300019999984 | 0.0731299959999987 | 0.2856299780000029 | F | F | F |
| 0.7014636415404397 | 0.3221922686590063 | 0.3984921572629749 | T | T | T |
| 0.6964672482403915 | 0.0685766713906739 | 0.5118248496618624 | T | T | T |
| 0.4515300210000035 | 0.7257599830000032 | 0.1056699989999998 | F | F | F |

|                    |                    |                    |   |   |   |
|--------------------|--------------------|--------------------|---|---|---|
| 0.4515300210000035 | 0.9757599830000032 | 0.2174100060000015 | F | F | F |
| 0.4515300210000035 | 0.7257599830000032 | 0.3291500039999988 | F | F | F |
| 0.4511521155837008 | 0.9746632874836352 | 0.4395235807078387 | T | T | T |
| 0.4504255645242454 | 0.7264127003950309 | 0.5543184549471910 | T | T | T |
| 0.2015300019999984 | 0.6284000260000013 | 0.1738899970000034 | F | F | F |
| 0.2015300019999984 | 0.8784000260000013 | 0.2856299780000029 | F | F | F |
| 0.2014327510036871 | 0.6281334940346017 | 0.3980858441470224 | T | T | T |
| 0.2037089128995358 | 0.8788213696003915 | 0.5114135611318521 | T | T | T |
| 0.4515300210000035 | 0.9757599830000032 | 0.1303700050000032 | F | F | F |
| 0.4515300210000035 | 0.7257599830000032 | 0.2421100030000005 | F | F | F |
| 0.4512911476205342 | 0.9749018992499114 | 0.3544169710316030 | T | T | T |
| 0.4515847496791522 | 0.7248400641941490 | 0.4665357477088186 | T | T | T |
| 0.2015300019999984 | 0.8231300099999999 | 0.1738899970000034 | F | F | F |
| 0.2015300019999984 | 0.5731300099999999 | 0.2856299780000029 | F | F | F |
| 0.2001863512437935 | 0.8216349419462093 | 0.3984175131120584 | T | T | T |
| 0.2031394893726396 | 0.5699502834587075 | 0.5094682866385880 | T | T | T |
| 0.9515299830000004 | 0.9757599830000032 | 0.2174100060000015 | F | F | F |
| 0.9515299830000004 | 0.7257599830000032 | 0.3291500039999988 | F | F | F |
| 0.9511807975402219 | 0.9748279611754302 | 0.4442959536056832 | T | T | T |
| 0.9516865136492634 | 0.7249391650568080 | 0.5490015514853012 | T | T | T |
| 0.7015300019999984 | 0.6284000260000013 | 0.1738899970000034 | F | F | F |
| 0.7015300019999984 | 0.8784000260000013 | 0.2856299780000029 | F | F | F |
| 0.7016741358266814 | 0.6277147840430709 | 0.3979227201733785 | T | T | T |
| 0.6978387476953577 | 0.8786605655915277 | 0.5112375649227531 | T | T | T |
| 0.9515299830000004 | 0.9757599830000032 | 0.1303700050000032 | F | F | F |
| 0.9515299830000004 | 0.7257599830000032 | 0.2421100030000005 | F | F | F |
| 0.9514617692761904 | 0.9749706686248941 | 0.3542301276977438 | T | T | T |
| 0.9495928050219826 | 0.7237110299273175 | 0.4666971827178474 | T | T | T |
| 0.9501803390361433 | 0.9737750931193024 | 0.5787197384991181 | T | T | T |
| 0.7015300019999984 | 0.8231300099999999 | 0.1738899970000034 | F | F | F |
| 0.7015300019999984 | 0.5731300099999999 | 0.2856299780000029 | F | F | F |
| 0.7025713136444245 | 0.8220533040590722 | 0.3982632830085130 | T | T | T |
| 0.6980704115903039 | 0.5693389016371234 | 0.5127603074937671 | T | T | T |
| 0.5266562247309547 | 0.5348053056914489 | 0.6066507645965270 | T | T | T |
| 0.4280715994510431 | 0.4569004275401039 | 0.5779936200321670 | T | T | T |
| 0.2015300019999984 | 0.4757600209999993 | 0.1738899970000034 | F | F | F |
| 0.2015300019999984 | 0.2257600020000012 | 0.2856299780000029 | F | F | F |
| 0.2002314767218346 | 0.4750014723315181 | 0.3987198651837259 | T | T | T |
| 0.2047404371380190 | 0.2238470962323452 | 0.5129937023895891 | T | T | T |
| 0.4515300210000035 | 0.2257600020000012 | 0.1738899970000034 | F | F | F |
| 0.4515300210000035 | 0.4757600209999993 | 0.2856299780000029 | F | F | F |
| 0.4514223850743931 | 0.2247218415672723 | 0.3981769463268900 | T | T | T |
| 0.4476738997847569 | 0.4734920573526472 | 0.5112400380633072 | T | T | T |
| 0.7015300019999984 | 0.4757600209999993 | 0.1738899970000034 | F | F | F |

|                    |                    |                    |   |   |   |
|--------------------|--------------------|--------------------|---|---|---|
| 0.7015300019999984 | 0.2257600020000012 | 0.2856299780000029 | F | F | F |
| 0.7036153166474066 | 0.4750197321504719 | 0.3986994956857328 | T | T | T |
| 0.6954829943406906 | 0.2233359011152578 | 0.5129735551787261 | T | T | T |
| 0.9515299830000004 | 0.2257600020000012 | 0.1738899970000034 | F | F | F |
| 0.9515299830000004 | 0.4757600209999993 | 0.2856299780000029 | F | F | F |
| 0.9507784107565072 | 0.2248512604722981 | 0.3984770143670260 | T | T | T |
| 0.9495241949056208 | 0.4728172825495189 | 0.5169688210318931 | T | T | T |
| 0.2015300019999984 | 0.9757599830000032 | 0.1738899970000034 | F | F | F |
| 0.2015300019999984 | 0.7257599830000032 | 0.2856299780000029 | F | F | F |
| 0.1964396347272659 | 0.9749084384521801 | 0.3982148398618632 | T | T | T |
| 0.2049839691882202 | 0.7236884603339965 | 0.5125461047418430 | T | T | T |
| 0.4515300210000035 | 0.7257599830000032 | 0.1738899970000034 | F | F | F |
| 0.4515300210000035 | 0.9757599830000032 | 0.2856299780000029 | F | F | F |
| 0.4518190184483558 | 0.7251144709826751 | 0.3981705137331027 | T | T | T |
| 0.4506012443146425 | 0.9736421502255351 | 0.5051340534599621 | T | T | T |
| 0.7015300019999984 | 0.9757599830000032 | 0.1738899970000034 | F | F | F |
| 0.7015300019999984 | 0.7257599830000032 | 0.2856299780000029 | F | F | F |
| 0.7061681000137757 | 0.9748648893391211 | 0.3982259444414893 | T | T | T |
| 0.6963665114009497 | 0.7232456842454654 | 0.5134063960416364 | T | T | T |
| 0.9515299830000004 | 0.7257599830000032 | 0.1738899970000034 | F | F | F |
| 0.9515299830000004 | 0.9757599830000032 | 0.2856299780000029 | F | F | F |
| 0.9511470861554465 | 0.7247769326505775 | 0.3985107839287239 | T | T | T |
| 0.9506445735093456 | 0.9735445227572109 | 0.5185228564921357 | T | T | T |
| 0.5005350452369639 | 0.5046432693991115 | 0.6381275123680089 | T | T | T |

**O<sub>2</sub>@RuO<sub>2</sub>(110)**

1.0000000000000000

|                    |                     |                     |
|--------------------|---------------------|---------------------|
| 6.2244000435000002 | 0.0000000000000000  | 0.0000000000000000  |
| 0.0000000000000000 | 12.6898002625000004 | 0.0000000000000000  |
| 0.0000000000000000 | 0.0000000000000000  | 28.3910999297999993 |

O    Ru  
70    32

**Selective dynamics**

**Direct**

|                    |                    |                    |   |   |   |
|--------------------|--------------------|--------------------|---|---|---|
| 0.4515300210000035 | 0.2257600020000012 | 0.1056699989999998 | F | F | F |
| 0.4515300210000035 | 0.4757600209999993 | 0.2174100060000015 | F | F | F |
| 0.4515300210000035 | 0.2257600020000012 | 0.3291500039999988 | F | F | F |
| 0.4517520195028372 | 0.4761953488114727 | 0.4411724833718474 | T | T | T |
| 0.4516764969018204 | 0.2252620035595589 | 0.5532763716097210 | T | T | T |
| 0.2015300019999984 | 0.1283999979999990 | 0.1738899970000034 | F | F | F |
| 0.2015300019999984 | 0.3783999890000018 | 0.2856299780000029 | F | F | F |
| 0.2010469192789107 | 0.1282627529942890 | 0.3978466823525760 | T | T | T |
| 0.2008910745958382 | 0.3801641990457387 | 0.5096161889019974 | T | T | T |



|                    |                    |                    |   |   |   |
|--------------------|--------------------|--------------------|---|---|---|
| 0.4515300210000035 | 0.4757600209999993 | 0.1303700050000032 | F | F | F |
| 0.4515300210000035 | 0.2257600020000012 | 0.2421100030000005 | F | F | F |
| 0.4515666198311994 | 0.4753648631329956 | 0.3548886229379911 | T | T | T |
| 0.4516093247022412 | 0.2242389401586392 | 0.4664484132068821 | T | T | T |
| 0.2015300019999984 | 0.3231300099999999 | 0.1738899970000034 | F | F | F |
| 0.2015300019999984 | 0.0731299959999987 | 0.2856299780000029 | F | F | F |
| 0.2011276145576455 | 0.3222443630034798 | 0.3980065014439504 | T | T | T |
| 0.2048383344038708 | 0.0705840226441091 | 0.5117125351016881 | T | T | T |
| 0.9515299830000004 | 0.4757600209999993 | 0.2174100060000015 | F | F | F |
| 0.9515299830000004 | 0.2257600020000012 | 0.3291500039999988 | F | F | F |
| 0.9516199873958364 | 0.4754653331278019 | 0.4435061789966940 | T | T | T |
| 0.9516038079507095 | 0.2247227801520237 | 0.5488363638221726 | T | T | T |
| 0.7015300019999984 | 0.1283999979999990 | 0.1738899970000034 | F | F | F |
| 0.7015300019999984 | 0.3783999890000018 | 0.2856299780000029 | F | F | F |
| 0.7020869565694543 | 0.1282701201482453 | 0.3978463433541478 | T | T | T |
| 0.7019924101797923 | 0.3801410218196864 | 0.5097612924760001 | T | T | T |
| 0.9515299830000004 | 0.4757600209999993 | 0.1303700050000032 | F | F | F |
| 0.9515299830000004 | 0.2257600020000012 | 0.2421100030000005 | F | F | F |
| 0.9515853184686033 | 0.4759563690528020 | 0.3544892839215749 | T | T | T |
| 0.9516334090136038 | 0.2238877861158201 | 0.4662290350362619 | T | T | T |
| 0.9522868369263170 | 0.4767325966323276 | 0.5772296283386580 | T | T | T |
| 0.7015300019999984 | 0.3231300099999999 | 0.1738899970000034 | F | F | F |
| 0.7015300019999984 | 0.0731299959999987 | 0.2856299780000029 | F | F | F |
| 0.7020104288277458 | 0.3222345313544585 | 0.3979989793699136 | T | T | T |
| 0.6983324404325744 | 0.0705957286161776 | 0.5116647102287079 | T | T | T |
| 0.4515300210000035 | 0.7257599830000032 | 0.1056699989999998 | F | F | F |
| 0.4515300210000035 | 0.9757599830000032 | 0.2174100060000015 | F | F | F |
| 0.4515300210000035 | 0.7257599830000032 | 0.3291500039999988 | F | F | F |
| 0.4515511035152850 | 0.9754559712959892 | 0.4395141156458342 | T | T | T |
| 0.4515919644695010 | 0.7245477246531401 | 0.5544601398563231 | T | T | T |
| 0.2015300019999984 | 0.6284000260000013 | 0.1738899970000034 | F | F | F |
| 0.2015300019999984 | 0.8784000260000013 | 0.2856299780000029 | F | F | F |
| 0.2012172185433988 | 0.6282723138537126 | 0.3982727665623559 | T | T | T |
| 0.2055404415966021 | 0.8808587444231657 | 0.5115606374069572 | T | T | T |
| 0.4515300210000035 | 0.9757599830000032 | 0.1303700050000032 | F | F | F |
| 0.4515300210000035 | 0.7257599830000032 | 0.2421100030000005 | F | F | F |
| 0.4515583338111727 | 0.9752390036881491 | 0.3543838234079679 | T | T | T |
| 0.4515674440297900 | 0.7265599260673369 | 0.4665806530098264 | T | T | T |
| 0.2015300019999984 | 0.8231300099999999 | 0.1738899970000034 | F | F | F |
| 0.2015300019999984 | 0.5731300099999999 | 0.2856299780000029 | F | F | F |
| 0.2005747661327764 | 0.8222987014177409 | 0.3981160673067470 | T | T | T |
| 0.2001510584279942 | 0.5722242998100744 | 0.5101507534512331 | T | T | T |
| 0.9515299830000004 | 0.9757599830000032 | 0.2174100060000015 | F | F | F |
| 0.9515299830000004 | 0.7257599830000032 | 0.3291500039999988 | F | F | F |

|                    |                    |                    |   |   |   |
|--------------------|--------------------|--------------------|---|---|---|
| 0.9515684231041915 | 0.9755501177910957 | 0.4441936660935075 | T | T | T |
| 0.9515432923238860 | 0.7273095278897362 | 0.5490158076202608 | T | T | T |
| 0.7015300019999984 | 0.6284000260000013 | 0.1738899970000034 | F | F | F |
| 0.7015300019999984 | 0.8784000260000013 | 0.2856299780000029 | F | F | F |
| 0.7018946423522958 | 0.6282864192801547 | 0.3982676342102029 | T | T | T |
| 0.6975660151986494 | 0.8808360018260394 | 0.5115309229621057 | T | T | T |
| 0.9515299830000004 | 0.9757599830000032 | 0.1303700050000032 | F | F | F |
| 0.9515299830000004 | 0.7257599830000032 | 0.2421100030000005 | F | F | F |
| 0.9515540690469477 | 0.9753808829685473 | 0.3542056803578515 | T | T | T |
| 0.9515791185161532 | 0.7264691729530107 | 0.4666952174416902 | T | T | T |
| 0.9513716455009528 | 0.9748511322431986 | 0.5786976979441786 | T | T | T |
| 0.7015300019999984 | 0.8231300099999999 | 0.1738899970000034 | F | F | F |
| 0.7015300019999984 | 0.5731300099999999 | 0.2856299780000029 | F | F | F |
| 0.7025241150497680 | 0.8222900851651774 | 0.3981182105703158 | T | T | T |
| 0.7030277248064568 | 0.5721984401463137 | 0.5100743427429396 | T | T | T |
| 0.4522969715172074 | 0.4692085827807416 | 0.5782738668481385 | T | T | T |
| 0.4572073456073086 | 0.3860062417290280 | 0.6034514033983557 | T | T | T |
| 0.2015300019999984 | 0.4757600209999993 | 0.1738899970000034 | F | F | F |
| 0.2015300019999984 | 0.2257600020000012 | 0.2856299780000029 | F | F | F |
| 0.1992540450413055 | 0.4750472059756242 | 0.3987402915563859 | T | T | T |
| 0.2044360056835536 | 0.2262755539699063 | 0.5126849819028244 | T | T | T |
| 0.4515300210000035 | 0.2257600020000012 | 0.1738899970000034 | F | F | F |
| 0.4515300210000035 | 0.4757600209999993 | 0.2856299780000029 | F | F | F |
| 0.4515557267998174 | 0.2250164557817482 | 0.3980592009189091 | T | T | T |
| 0.4513898754004018 | 0.4759719494787329 | 0.5113992657520815 | T | T | T |
| 0.7015300019999984 | 0.4757600209999993 | 0.1738899970000034 | F | F | F |
| 0.7015300019999984 | 0.2257600020000012 | 0.2856299780000029 | F | F | F |
| 0.7038864915220884 | 0.4750587493284500 | 0.3987316735133466 | T | T | T |
| 0.6987419026404486 | 0.2262608469414894 | 0.5126778951681084 | T | T | T |
| 0.9515299830000004 | 0.2257600020000012 | 0.1738899970000034 | F | F | F |
| 0.9515299830000004 | 0.4757600209999993 | 0.2856299780000029 | F | F | F |
| 0.9515778402164240 | 0.2251539044579003 | 0.3982431528652900 | T | T | T |
| 0.9515122867543878 | 0.4766197713594075 | 0.5173120167837304 | T | T | T |
| 0.2015300019999984 | 0.9757599830000032 | 0.1738899970000034 | F | F | F |
| 0.2015300019999984 | 0.7257599830000032 | 0.2856299780000029 | F | F | F |
| 0.1967045088427794 | 0.9752320056921638 | 0.3981939027459095 | T | T | T |
| 0.2058504212468120 | 0.7260980642641440 | 0.5130588512372839 | T | T | T |
| 0.4515300210000035 | 0.7257599830000032 | 0.1738899970000034 | F | F | F |
| 0.4515300210000035 | 0.9757599830000032 | 0.2856299780000029 | F | F | F |
| 0.4515393018741001 | 0.7254454265357796 | 0.3981906460900612 | T | T | T |
| 0.4515359378839129 | 0.9758678637062295 | 0.5051963150410647 | T | T | T |
| 0.7015300019999984 | 0.9757599830000032 | 0.1738899970000034 | F | F | F |
| 0.7015300019999984 | 0.7257599830000032 | 0.2856299780000029 | F | F | F |
| 0.7064212259104361 | 0.9752321329904131 | 0.3981949948286833 | T | T | T |

|                    |                    |                    |   |   |   |
|--------------------|--------------------|--------------------|---|---|---|
| 0.6972728053418237 | 0.7260974935171240 | 0.5130469241784466 | T | T | T |
| 0.9515299830000004 | 0.7257599830000032 | 0.1738899970000034 | F | F | F |
| 0.9515299830000004 | 0.9757599830000032 | 0.2856299780000029 | F | F | F |
| 0.9515616248107597 | 0.7252984437512109 | 0.3984299131535253 | T | T | T |
| 0.9515569964950331 | 0.9760152038300909 | 0.5185432597647749 | T | T | T |

FeN<sub>2</sub>S<sub>2</sub>C

1.000000000000000

|                     |                     |                     |
|---------------------|---------------------|---------------------|
| 12.4588003158999996 | 0.0000000000000000  | 0.0000000000000000  |
| -6.2367124682000004 | 10.5828929508999998 | 0.0000000000000000  |
| 0.0058500891000000  | -0.0107090795000000 | 14.9636953188999993 |

|    |   |   |    |
|----|---|---|----|
| C  | S | N | Fe |
| 44 | 2 | 2 | 1  |

Direct

|                    |                    |                    |
|--------------------|--------------------|--------------------|
| 0.9742885749825311 | 0.9896371818643809 | 0.2439158552678081 |
| 0.1080059432711509 | 0.0575488217819937 | 0.2474985319488557 |
| 0.1763904534248326 | 0.9932938136660102 | 0.2385412114954296 |
| 0.3103567322081360 | 0.0607308946651645 | 0.2411891835604052 |
| 0.3756863493818370 | 0.9932496517810724 | 0.2389512580116984 |
| 0.5083336190997489 | 0.0575002627821893 | 0.2442572429126251 |
| 0.5739283009633367 | 0.9897592752063389 | 0.2476370230753820 |
| 0.7065908998434928 | 0.0540184792270642 | 0.2526003273681213 |
| 0.7719418454057270 | 0.9865701926089681 | 0.2500616600477523 |
| 0.9059023739862582 | 0.0539481970449065 | 0.2527450226549714 |
| 0.9739930447836882 | 0.1885903982725600 | 0.2618581035189550 |
| 0.1061777701244480 | 0.2561993721717692 | 0.2713359806375710 |
| 0.1749819545888510 | 0.1905109978167349 | 0.2650507015653819 |
| 0.3068500481324329 | 0.2523327222136372 | 0.2712405356052067 |
| 0.3788026719408781 | 0.1957458717060884 | 0.2514276379309290 |
| 0.5147102724402883 | 0.2633553488091796 | 0.2432266972128371 |
| 0.5766082176899251 | 0.1919609241756235 | 0.2439917669796994 |
| 0.7097439252245155 | 0.2548157585638887 | 0.2459087043187966 |
| 0.7748588861425870 | 0.1878212412661400 | 0.2528941080635267 |
| 0.9074344141343218 | 0.2550587848830549 | 0.2568262920240988 |
| 0.9740762645696358 | 0.3889401489025653 | 0.2512426117621813 |
| 0.1054757884585907 | 0.4572187973165477 | 0.2567757994277038 |
| 0.1703318978411132 | 0.3916827623642367 | 0.2732003652353798 |
| 0.2996226934905325 | 0.4656659995386705 | 0.2843350168410737 |
| 0.7125079089319482 | 0.4519043801436609 | 0.2249615202813162 |
| 0.7782358573311446 | 0.3873088211867622 | 0.2378424441605099 |
| 0.9100164076025424 | 0.4560003376849922 | 0.2396090265595112 |
| 0.9770024051439059 | 0.5899577873349340 | 0.2323809317898251 |
| 0.1084018966170554 | 0.6582845564695227 | 0.2380944881731399 |
| 0.1724177326360853 | 0.5911739600223703 | 0.2496264047626273 |

|                    |                    |                    |
|--------------------|--------------------|--------------------|
| 0.3041642153099622 | 0.6598951170737672 | 0.2521591954495832 |
| 0.3698111032489359 | 0.5953065621662665 | 0.2654501184777220 |
| 0.7826997648977319 | 0.5816395808920769 | 0.2062606954057125 |
| 0.9121032478036109 | 0.6556175216991225 | 0.2169280984059937 |
| 0.9761820107010174 | 0.7911025889371817 | 0.2194223146540008 |
| 0.1083844004564805 | 0.8587177078213276 | 0.2290267012004714 |
| 0.1749908505334428 | 0.7922316096419526 | 0.2335229509605929 |
| 0.3075623857556773 | 0.8594231255892434 | 0.2381173254991346 |
| 0.3726934284322049 | 0.7924300554446370 | 0.2449276874781322 |
| 0.5057583329235043 | 0.8553172507218643 | 0.2474494608687854 |
| 0.5676418113777510 | 0.7838829280058207 | 0.2478574787043761 |
| 0.7034836059089222 | 0.8515727569387413 | 0.2397533963892270 |
| 0.7754612577617719 | 0.7950342754370741 | 0.2198938610647201 |
| 0.9073269001256216 | 0.8567098985606422 | 0.2261781197697872 |
| 0.3837956234720171 | 0.3991637040378602 | 0.3272231743466615 |
| 0.6984990472762517 | 0.6483094116064936 | 0.1636600516471286 |
| 0.5841891374003102 | 0.3929707933977067 | 0.2325708802113617 |
| 0.4981347971390802 | 0.6542247309108340 | 0.2580556667548772 |
| 0.5410630570841561 | 0.5235158866463422 | 0.2452266325184129 |

OH@FeN<sub>2</sub>S<sub>2</sub>C

1.0000000000000000

12.4588003158999996 0.0000000000000000 0.0000000000000000

-6.2367124682000004 10.5828929508999998 0.0000000000000000

0.0058500891000000 -0.0107090795000000 14.9636953188999993

C S N Fe O H

44 2 2 1 1 1

Direct

|                    |                    |                    |
|--------------------|--------------------|--------------------|
| 0.9677119388127680 | 0.9862750773718969 | 0.2408061266982506 |
| 0.1016242115206737 | 0.0540882516881634 | 0.2443579768041053 |
| 0.1697633654952454 | 0.9897469520312930 | 0.2355190141823149 |
| 0.3037483353617464 | 0.0575189539139970 | 0.2393164966145146 |
| 0.3692973966002120 | 0.9898342746842358 | 0.2359283422558712 |
| 0.5017596060013868 | 0.0541871994826939 | 0.2411258161859006 |
| 0.5679329641555410 | 0.9868239742557035 | 0.2443372956070364 |
| 0.7004477518940863 | 0.0512189915314498 | 0.2496321728016287 |
| 0.7661523717726560 | 0.9838404562734827 | 0.2480589769586660 |
| 0.8998871890681036 | 0.0509735101977781 | 0.2496912778781082 |
| 0.9683723578254765 | 0.1859293626341092 | 0.2575952351331370 |
| 0.1002027941252771 | 0.2532748899639927 | 0.2674639474956466 |
| 0.1682615122568490 | 0.1865223326675301 | 0.2626905304712708 |
| 0.2996888295022902 | 0.2480069278898387 | 0.2726907548581256 |
| 0.3721576201845235 | 0.1922776405421997 | 0.2526182401166720 |

|                    |                    |                    |
|--------------------|--------------------|--------------------|
| 0.5091914090087603 | 0.2604416291372976 | 0.2446491599872230 |
| 0.5704034737114995 | 0.1883383143339183 | 0.2421177012378312 |
| 0.7035628539779011 | 0.2514968931852405 | 0.2425921403227757 |
| 0.7690012200379786 | 0.1848042355381505 | 0.2489250792473293 |
| 0.9016505300627258 | 0.2521420067684496 | 0.2518265382921419 |
| 0.9685196373169244 | 0.3857450403630792 | 0.2449634794536638 |
| 0.1001371824014625 | 0.4540297443381932 | 0.2501709939211020 |
| 0.1650950970722935 | 0.3890031149697127 | 0.2685133199046424 |
| 0.2939051910437196 | 0.4623635929858891 | 0.2840921897834757 |
| 0.7049854613940579 | 0.4472024097975249 | 0.2231040674417431 |
| 0.7720991741615159 | 0.3836676699055300 | 0.2336433098855143 |
| 0.9039994979485082 | 0.4524415561439483 | 0.2337016085148001 |
| 0.9702760098583723 | 0.5862082372565928 | 0.2263599596125119 |
| 0.1019910007252203 | 0.6546069119698824 | 0.2317308413958907 |
| 0.1667973326313892 | 0.5878080561126234 | 0.2429409323483079 |
| 0.2985532046259825 | 0.6562352263595753 | 0.2478562548114561 |
| 0.3650934990833089 | 0.5927627666490949 | 0.2662451669167208 |
| 0.7743201613918852 | 0.5773556830396227 | 0.2027391107445319 |
| 0.9042047718750362 | 0.6514976011209705 | 0.2122260606277430 |
| 0.9690488000783525 | 0.7873481429363974 | 0.2154422698447821 |
| 0.1012190363935774 | 0.8548574593465453 | 0.2248007709947547 |
| 0.1683691734806195 | 0.7885647838413050 | 0.2284568555686557 |
| 0.3008449850173639 | 0.8558796147380733 | 0.2338416399382810 |
| 0.3663278067948312 | 0.7889712387134685 | 0.2413348851049893 |
| 0.4992327422922511 | 0.8527662535452163 | 0.2450756682445111 |
| 0.5609481034214546 | 0.7812833656319225 | 0.2499015172665138 |
| 0.6976904217155050 | 0.8490557496119950 | 0.2396439487830639 |
| 0.7687744446999837 | 0.7922780206736748 | 0.2182884595919258 |
| 0.9007140289726455 | 0.8536169681934181 | 0.2232824641577258 |
| 0.3675107299875308 | 0.3898930864790297 | 0.3346664552704335 |
| 0.6865081127090396 | 0.6431376197737839 | 0.1681444620592798 |
| 0.5783014266966812 | 0.3886928430760925 | 0.2361711972055096 |
| 0.4931946708226886 | 0.6545939121918458 | 0.2666643261859242 |
| 0.5658497605861559 | 0.5379027360980204 | 0.2977407051849011 |
| 0.6694129753171152 | 0.5881994394142871 | 0.3955178266890103 |
| 0.6423384951087967 | 0.6062601146312712 | 0.4517065733990749 |

O@FeN<sub>2</sub>S<sub>2</sub>C

1.0000000000000000

12.4588003158999996 0.0000000000000000 0.0000000000000000

-6.2367124682000004 10.5828929508999998 0.0000000000000000

0.0058500891000000 -0.0107090795000000 14.9636953188999993

C S N Fe O

44 2 2 1 1

Direct

|                    |                    |                    |
|--------------------|--------------------|--------------------|
| 0.9724571160462848 | 0.9886124469593378 | 0.2410819971063723 |
| 0.1060926786234541 | 0.0565017991889146 | 0.2455188722535002 |
| 0.1748211109270438 | 0.9923043790148597 | 0.2379001427578739 |
| 0.3086820961916792 | 0.0599699988871283 | 0.2429979332171597 |
| 0.3741056192283077 | 0.9923706119842860 | 0.2398878965546920 |
| 0.5066123307697334 | 0.0567936884020831 | 0.2447431709907444 |
| 0.5722944268719370 | 0.9888735967999308 | 0.2470852883288716 |
| 0.7048991705994849 | 0.0530725864348368 | 0.2509757224975439 |
| 0.7700152958822137 | 0.9855340484758747 | 0.2484539985854919 |
| 0.9039963324256559 | 0.0527295804585547 | 0.2495611283061644 |
| 0.9719207320015746 | 0.1873418039850073 | 0.2579908541485288 |
| 0.1037793927219810 | 0.2548344739676653 | 0.2682278452460601 |
| 0.1724369999434150 | 0.1891408855453534 | 0.2634913540302861 |
| 0.3038353880205441 | 0.2507047280896401 | 0.2743291479651271 |
| 0.3771487575711907 | 0.1948848228100966 | 0.2561930930862046 |
| 0.5130333424163159 | 0.2630546517861150 | 0.2494715112394835 |
| 0.5747730325950480 | 0.1913998212005029 | 0.2457713598181716 |
| 0.7079092717102310 | 0.2538102837692708 | 0.2453015419857141 |
| 0.7729803118669865 | 0.1867635692395634 | 0.2504857796679011 |
| 0.9055529189938689 | 0.2538770647668380 | 0.2527939673782562 |
| 0.9724796038341553 | 0.3876160169687315 | 0.2464231506752809 |
| 0.1038510730430301 | 0.4559476675421586 | 0.2524606831020653 |
| 0.1681465783264015 | 0.3902934308892451 | 0.2703222304419660 |
| 0.2967271557962397 | 0.4634209717891563 | 0.2853762202747367 |
| 0.7109926244433799 | 0.4507996374599679 | 0.2262491924396563 |
| 0.7766814197297293 | 0.3860305563647891 | 0.2357244134170220 |
| 0.9085602122054959 | 0.4547501099988118 | 0.2350403585292871 |
| 0.9756491295801892 | 0.5886527687219610 | 0.2276886451488815 |
| 0.1070099322398967 | 0.6570893335578466 | 0.2341634749991966 |
| 0.1709372241522933 | 0.5899555234040293 | 0.2461821001926672 |
| 0.3025213322022985 | 0.6585210121349457 | 0.2513811255208163 |
| 0.3677748923347368 | 0.5939869995887845 | 0.2679562267354740 |
| 0.7809452661170119 | 0.5796707070985639 | 0.2052023952117974 |
| 0.9106574583487221 | 0.6544793292923858 | 0.2134518248692154 |
| 0.9745721092738265 | 0.7898659162386510 | 0.2170804193726620 |
| 0.1068699481729573 | 0.8577286101838627 | 0.2269928446290509 |
| 0.1734915440631352 | 0.7911806237129241 | 0.2312889817602323 |
| 0.3059529417903867 | 0.8584402115159077 | 0.2374460950042554 |
| 0.3710217957632206 | 0.7912865246230270 | 0.2448125242194605 |
| 0.5039138278465116 | 0.8544654921595992 | 0.2480696359567424 |
| 0.5657436146167069 | 0.7825750056803498 | 0.2515845543554188 |
| 0.7017208505100478 | 0.8505080645964006 | 0.2413354442562432 |

|                    |                    |                    |
|--------------------|--------------------|--------------------|
| 0.7738331507014446 | 0.7942255922521730 | 0.2208574292326097 |
| 0.9055984627309901 | 0.8554312618559219 | 0.2243087772733301 |
| 0.3724469861421417 | 0.3923213176845691 | 0.3358605519430836 |
| 0.6913266375298266 | 0.6437727417839527 | 0.1739392449924588 |
| 0.5840019990207341 | 0.3937438667859154 | 0.2418721418662072 |
| 0.4955914569636892 | 0.6543875482492858 | 0.2657144213613128 |
| 0.5490789442640588 | 0.5278391253261946 | 0.2739244197542530 |
| 0.6395661728497554 | 0.5867700977740375 | 0.3635880143004647 |

OOH@FeN<sub>2</sub>S<sub>2</sub>C

1.0000000000000000

|                     |                     |                     |
|---------------------|---------------------|---------------------|
| 12.4588003158999996 | 0.0000000000000000  | 0.0000000000000000  |
| -6.2367124682000004 | 10.5828929508999998 | 0.0000000000000000  |
| 0.0058500891000000  | -0.0107090795000000 | 14.9636953188999993 |

|    |   |   |    |   |   |
|----|---|---|----|---|---|
| C  | S | N | Fe | O | H |
| 44 | 2 | 2 | 1  | 2 | 1 |

Direct

|                    |                    |                    |
|--------------------|--------------------|--------------------|
| 0.9735472441410133 | 0.9859214773219460 | 0.2403431530406323 |
| 0.1072229553096981 | 0.0538306470538743 | 0.2442220073484722 |
| 0.1758167592351960 | 0.9895833569828141 | 0.2363537844195754 |
| 0.3096584041447818 | 0.0573873586545123 | 0.2412033109169289 |
| 0.3750694288743109 | 0.9897327260288178 | 0.2384330161335222 |
| 0.5076419198251222 | 0.0541632316446197 | 0.2432946242460165 |
| 0.5732958623536900 | 0.9861137031087576 | 0.2459568648491264 |
| 0.7059546784274570 | 0.0504171829832172 | 0.2494834563951876 |
| 0.7711104461737145 | 0.9828742187718427 | 0.2479374618842356 |
| 0.9051155135253974 | 0.0500593791146087 | 0.2487541201789237 |
| 0.9731388359775417 | 0.1847682710130097 | 0.2559766213464169 |
| 0.1050132501374726 | 0.2522178155284939 | 0.2661436661480742 |
| 0.1736000924989919 | 0.1864135504441842 | 0.2620234025282599 |
| 0.3051818037261974 | 0.2483018607713117 | 0.2724946850909869 |
| 0.3781549922619183 | 0.1923197552335835 | 0.2538085282348301 |
| 0.5140634744266601 | 0.2604359499564101 | 0.2464083653486398 |
| 0.5758625102654810 | 0.1888365197493128 | 0.2433579569727292 |
| 0.7089442338274534 | 0.2510758616854449 | 0.2418271863889713 |
| 0.7741202818008286 | 0.1840961307032727 | 0.2475634053344256 |
| 0.9067373565884632 | 0.2512321988043328 | 0.2498062064886591 |
| 0.9736779292283023 | 0.3849270670142844 | 0.2430418979562782 |
| 0.1051042711490276 | 0.4532992911138762 | 0.2496728122207555 |
| 0.1695240821933105 | 0.3877377533043407 | 0.2678412567628506 |
| 0.2980197207495601 | 0.4606903714423342 | 0.2830404801095616 |
| 0.7117345831301286 | 0.4479701461333830 | 0.2229579618792787 |
| 0.7775525173609661 | 0.3831609170724344 | 0.2317378299656823 |

|                    |                    |                    |
|--------------------|--------------------|--------------------|
| 0.9095931365335289 | 0.4519448813419526 | 0.2311579676290291 |
| 0.9767813866250646 | 0.5859044887528979 | 0.2242601291524992 |
| 0.1080761764207017 | 0.6543814800809412 | 0.2314820901194931 |
| 0.1720212291805632 | 0.5872797226342308 | 0.2438071357391502 |
| 0.3036010341408360 | 0.6559186361072070 | 0.2499659727968132 |
| 0.3687876970231720 | 0.5915376812815250 | 0.2667549179671469 |
| 0.7818125597597058 | 0.5773118593546877 | 0.2035712028744118 |
| 0.9116254708334487 | 0.6517894110918940 | 0.2107768012246603 |
| 0.9754461415222961 | 0.7872070802997956 | 0.2152700633956380 |
| 0.1078232947181684 | 0.8550057699378757 | 0.2251798379674715 |
| 0.1744374435431315 | 0.7884660227153468 | 0.2292184900087842 |
| 0.3068396619909309 | 0.8558019405944716 | 0.2359696391058305 |
| 0.3719727289748161 | 0.7887092485883057 | 0.2436184527455807 |
| 0.5048194415186433 | 0.8517400896044095 | 0.2471040880369411 |
| 0.5665023924482138 | 0.7796487917195565 | 0.2512250161322981 |
| 0.7028178086716258 | 0.8477961464156102 | 0.2416865063786908 |
| 0.7745688511377512 | 0.7911802489416909 | 0.2212911514921747 |
| 0.9065741659288101 | 0.8528060661166430 | 0.2235943448931707 |
| 0.3752453320384528 | 0.3907758161840379 | 0.3332781732356116 |
| 0.6910054902558055 | 0.6408674642164960 | 0.1740199347449673 |
| 0.5841542253880824 | 0.3909417741532228 | 0.2376051757329878 |
| 0.4969115029976631 | 0.6517029090204928 | 0.2655689990295679 |
| 0.5466522219356407 | 0.5219699984640902 | 0.2668950142366600 |
| 0.6534874398681210 | 0.5908839680628485 | 0.3591462381250051 |
| 0.6276950638339183 | 0.4991590102261023 | 0.4335455847724876 |
| 0.7059156453781846 | 0.5475335094586636 | 0.4667131652739024 |

**O<sub>2</sub>@FeN<sub>2</sub>S<sub>2</sub>C**

1.0000000000000000

12.4588003158999996 0.0000000000000000 0.0000000000000000

-6.2367124682000004 10.5828929508999998 0.0000000000000000

0.0058500891000000 -0.0107090795000000 14.9636953188999993

C S N Fe O

44 2 2 1 2

**Direct**

0.9755624361614892 0.9905526775398179 0.2408503353806112

0.1092398018623096 0.0585058057617487 0.2448764122953631

0.1777846507629131 0.9943116158069689 0.2364551085095102

0.3116512479682575 0.0619941597941077 0.2407411916048904

0.3769453671430014 0.9942772065078993 0.2372097259653108

0.5095584574171208 0.0586001008401589 0.2418367701960147

0.5751002802224849 0.9904258194016686 0.2443429328017596

0.7077864535501465 0.0547325743269864 0.2489278739486640



|                    |                    |                    |
|--------------------|--------------------|--------------------|
| 0.7730250450977468 | 0.9872232088884934 | 0.2477767856499838 |
| 0.9069772391233119 | 0.0545161810812985 | 0.2493902043704757 |
| 0.9749120648104632 | 0.1892320756013508 | 0.2570586020737458 |
| 0.1068072726109471 | 0.2567338515477784 | 0.2669962384401758 |
| 0.1755901346060960 | 0.1910899639843538 | 0.2627669898187776 |
| 0.3073635422432555 | 0.2530561357800125 | 0.2722358107988109 |
| 0.3801270976383049 | 0.1969863221097996 | 0.2532705758093710 |
| 0.5161329053522085 | 0.2651240968622274 | 0.2455392688816356 |
| 0.5778134893189087 | 0.1932355395570715 | 0.2424248248916807 |
| 0.7108506583997559 | 0.2555231306099418 | 0.2422721366718961 |
| 0.7759553547485908 | 0.1884401925852059 | 0.2480358292490855 |
| 0.9085057639934241 | 0.2557179996478532 | 0.2509533730268060 |
| 0.9752989343992593 | 0.3894668094170787 | 0.2442713275959232 |
| 0.1065673023575127 | 0.4578229223074275 | 0.2502830035715868 |
| 0.1708798367589769 | 0.3922398197132766 | 0.2681817589704522 |
| 0.2994148702775633 | 0.4654456738727584 | 0.2817651658122740 |
| 0.7138767093234432 | 0.4526163834601782 | 0.2245050939943010 |
| 0.7795536874067491 | 0.3877743808140337 | 0.2333556716349635 |
| 0.9114428900654057 | 0.4565722984250136 | 0.2328896896559677 |
| 0.9785667988304564 | 0.5905084062754099 | 0.2259219787459670 |
| 0.1098652154501209 | 0.6590487023552486 | 0.2320165895292161 |
| 0.1736959365709615 | 0.5917926332986442 | 0.2436960964981829 |
| 0.3053422371780687 | 0.6604399106390988 | 0.2482296216288371 |
| 0.3702698779599791 | 0.5956128420933913 | 0.2640241947162024 |
| 0.7838530937679126 | 0.5820890726458842 | 0.2054744628578412 |
| 0.9135625801275901 | 0.6564044940644278 | 0.2124796058830432 |
| 0.9774688143651155 | 0.7919071645452752 | 0.2159121886946966 |
| 0.1097580363233523 | 0.8597598757806507 | 0.2254846977888843 |
| 0.1763488921658239 | 0.7931446362254926 | 0.2291913519218625 |
| 0.3088362867307065 | 0.8604072083624940 | 0.2348312700767042 |
| 0.3738462977072236 | 0.7931624203318329 | 0.2416648190904167 |
| 0.5066571881158806 | 0.8559922197790378 | 0.2447629915237386 |
| 0.5683071964504113 | 0.7839112818301630 | 0.2481152011402539 |
| 0.7047785412254035 | 0.8521253310794804 | 0.2400982767412877 |
| 0.7768851356992481 | 0.7959541447440700 | 0.2201514284721520 |
| 0.9086773613357055 | 0.8575389062161475 | 0.2237224139259573 |
| 0.3785965254697704 | 0.3973466371092277 | 0.3306120126903503 |
| 0.6945986285726387 | 0.6460305362896995 | 0.1713777387308352 |
| 0.5865326421891910 | 0.3955122346227100 | 0.2384181760674956 |
| 0.4987523493139295 | 0.6552212486418344 | 0.2613810959154809 |
| 0.5494360804135919 | 0.5285564627656077 | 0.2642675007334752 |
| 0.6570381504441923 | 0.5934307968261645 | 0.3559687808182612 |
| 0.6396234069730488 | 0.5180067372335098 | 0.4225849371888151 |

1.00000000000000  
 12.3236999512000001 0.0000000000000000 0.0000000000000000  
 -6.1625538564999998 10.6730391195000003 0.0000000000000000  
 0.0000000000000000 0.0000000000000000 15.0000000000000000

C S N Fe  
 44 3 1 1

Direct

0.9735771506187542 0.9902618909840085 0.2366791825289494  
 0.1068024701875908 0.0567597790402872 0.2413963893173178  
 0.1744854019901121 0.9915810127629855 0.2347777559596962  
 0.3083667187602850 0.0588810191598611 0.2376323853860352  
 0.3742250144361163 0.9918319283567615 0.2377152393185104  
 0.5072731515040362 0.0583328524024036 0.2383258883327735  
 0.5738326939617274 0.9921073743243440 0.2436351189556237  
 0.7072297490696747 0.0576073320033844 0.2429627968881669  
 0.7747197557850255 0.9927290438852080 0.2427635623806550  
 0.9075563208033101 0.0571464155172726 0.2423207873974615  
 0.9742904784118082 0.1902667933506568 0.2502606442230497  
 0.1049489173352636 0.2553151207516717 0.2646469398326660  
 0.1723585036453137 0.1880144787728358 0.2601757614222119  
 0.3038836787043019 0.2487916664417086 0.2698534514589354  
 0.3763561142392606 0.1933791511116246 0.2477701919170052  
 0.5122835670613300 0.2621077537681380 0.2378281753450458  
 0.5749967258908680 0.1918395234444476 0.2343305566044373  
 0.7085915891093212 0.2558228526057664 0.2329363948438587  
 0.7747367251835240 0.1901336687204660 0.2391226069708074  
 0.9076458688572604 0.2568809687488819 0.2438120279333623  
 0.9738918449590246 0.3898606602676176 0.2415592875541515  
 0.1050477211015772 0.4572397813381920 0.2556528704107089  
 0.1671409437725822 0.3887296913114940 0.2737995914453215  
 0.2931586998917519 0.4595663410203027 0.2987879912121106  
 0.7089807682894989 0.4514867848397384 0.2185869409389414  
 0.7764280495201630 0.3874956379498769 0.2259601074798443  
 0.9090239535517243 0.4565615614705675 0.2292518955201379  
 0.9752269073773272 0.5899221323560107 0.2258495313121321  
 0.1070141389888547 0.6578523972469047 0.2374076143610875  
 0.1714397467198529 0.5911042825263513 0.2544527090323405  
 0.3023641511904895 0.6598699713901037 0.2714834758860605  
 0.3580841908573281 0.5890907653347660 0.2973679768985524  
 0.7776318960974136 0.5815844168335789 0.2037538122658039  
 0.9085928615056961 0.6554180048194164 0.2122147945275847  
 0.9740036506182664 0.7903334948077223 0.2158848125329727  
 0.1066766150061934 0.8573711200953428 0.2264168554740511  
 0.1736235231929334 0.7910866441104426 0.2351991519147123

|                    |                    |                    |
|--------------------|--------------------|--------------------|
| 0.3069616906344110 | 0.8583261097801966 | 0.2441980725538071 |
| 0.3722580948925122 | 0.7929911187564171 | 0.2612443824768042 |
| 0.5073866966812278 | 0.8597462612259581 | 0.2582053403699236 |
| 0.5780023618297569 | 0.7993764478017412 | 0.2651403970473064 |
| 0.7075901918333750 | 0.8594450700829788 | 0.2443839449482877 |
| 0.7743763128297192 | 0.7968814627110139 | 0.2241898480833782 |
| 0.9061021345188542 | 0.8572238713126266 | 0.2230475706474824 |
| 0.3749811073976133 | 0.3844194661797072 | 0.3367343357411207 |
| 0.5165988735032054 | 0.6614321091813303 | 0.3302061191577522 |
| 0.6846501087586608 | 0.6467000216565454 | 0.1764573026766807 |
| 0.5800241048089019 | 0.3910422203129088 | 0.2306229057983663 |
| 0.5403384771162286 | 0.5162121681274270 | 0.2660344537159942 |

OH@FeNS<sub>3</sub>C

1.00000000000000

12.3236999512000001 0.0000000000000000 0.0000000000000000

-6.1625538564999998 10.6730391195000003 0.0000000000000000

0.0000000000000000 0.0000000000000000 15.0000000000000000

C S N Fe O H

44 3 1 1 1 1

Direct

|                    |                    |                    |
|--------------------|--------------------|--------------------|
| 0.9724929784047522 | 0.9909850058334547 | 0.2340999910914663 |
| 0.1059050763962291 | 0.0576934214396273 | 0.2378753606558341 |
| 0.1738481601122033 | 0.9927676463800795 | 0.2327722913976932 |
| 0.3077331163536853 | 0.0601237733825530 | 0.2378408599308200 |
| 0.3734516197858062 | 0.9930539613269271 | 0.2365170020396371 |
| 0.5064344291037496 | 0.0592743549092321 | 0.2368488132015382 |
| 0.5731545097278127 | 0.9926874248474056 | 0.2413982310981419 |
| 0.7064236688171565 | 0.0583403439084298 | 0.2397782618724764 |
| 0.7737694122451808 | 0.9933168197653901 | 0.2411939706417921 |
| 0.9065504823108529 | 0.0579308350550090 | 0.2382764531430535 |
| 0.9737517838426278 | 0.1914961135866363 | 0.2423275633057979 |
| 0.1045523382507506 | 0.2571294143438748 | 0.2558861697390163 |
| 0.1714698350756178 | 0.1892821605763689 | 0.2548050620083255 |
| 0.3021072318015958 | 0.2495450033133924 | 0.2691671309147815 |
| 0.3760116050297981 | 0.1943169320235667 | 0.2516035826078136 |
| 0.5127129531074978 | 0.2636348906276514 | 0.2451580439356340 |
| 0.5746052867584329 | 0.1926963821494220 | 0.2348798454077801 |
| 0.7079508520516300 | 0.2562158584560936 | 0.2302838758688523 |
| 0.7741022085637684 | 0.1906859745550348 | 0.2337271661299326 |
| 0.9071978244305329 | 0.2578951455702359 | 0.2355161437152484 |
| 0.9736889051117125 | 0.3907830027556325 | 0.2320820492368357 |
| 0.1048164604442966 | 0.4585585499095148 | 0.2456202547371559 |

|                    |                    |                    |
|--------------------|--------------------|--------------------|
| 0.1668179358335023 | 0.3904871612103084 | 0.2638524694538459 |
| 0.2921042406671842 | 0.4615984999283826 | 0.2911989469230370 |
| 0.7094786363015669 | 0.4521434589275690 | 0.2231410873472374 |
| 0.7762839577377433 | 0.3879033743616603 | 0.2227768576709355 |
| 0.9087598127590611 | 0.4574882550124859 | 0.2220222847735904 |
| 0.9744380707941124 | 0.5908539979192593 | 0.2197033109635000 |
| 0.1064732174616765 | 0.6590953123185852 | 0.2302557506884944 |
| 0.1710809432013153 | 0.5923665708848350 | 0.2460561901093769 |
| 0.3011611117720941 | 0.6610097943482351 | 0.2657736415343777 |
| 0.3568285432640098 | 0.5906350945547506 | 0.2929503289678570 |
| 0.7754798535329684 | 0.5817452432423750 | 0.2073440754677591 |
| 0.9069681680749736 | 0.6562203349773204 | 0.2105476233918259 |
| 0.9726288427230246 | 0.7910537809694496 | 0.2147250241033400 |
| 0.1055251040039774 | 0.8584624390973699 | 0.2235186496596561 |
| 0.1727977874815282 | 0.7922367739162707 | 0.2303689780735339 |
| 0.3059851857324614 | 0.8594721318791040 | 0.2405466124212627 |
| 0.3711596215567886 | 0.7941321454460516 | 0.2576759856333847 |
| 0.5063952617238459 | 0.8605651684485716 | 0.2570486214227338 |
| 0.5768342793100193 | 0.8002390685755576 | 0.2682249710884421 |
| 0.7064258360989947 | 0.8603080338231028 | 0.2470901541788122 |
| 0.7728844485401966 | 0.7973511764707987 | 0.2275412978263224 |
| 0.9043586809035596 | 0.8574562604103085 | 0.2235082537216766 |
| 0.3675239584544543 | 0.3850873338992085 | 0.3346039190629895 |
| 0.5101373784892376 | 0.6653002433267993 | 0.3375238889308692 |
| 0.6783369153451356 | 0.6443254257668692 | 0.1877175286157455 |
| 0.5836191620144365 | 0.3925390522671799 | 0.2461821970269962 |
| 0.5574223858925886 | 0.5192476138062856 | 0.2988983520638702 |
| 0.6486316092905922 | 0.5452303576445401 | 0.4044449385318820 |
| 0.6950089793132522 | 0.5001938928512314 | 0.4067799536670352 |

O@FeNS<sub>3</sub>C

1.0000000000000000

12.3236999512000001 0.0000000000000000 0.0000000000000000

-6.1625538564999998 10.6730391195000003 0.0000000000000000

0.0000000000000000 0.0000000000000000 15.0000000000000000

C S N Fe O

44 3 1 1 1

Direct

|                    |                    |                    |
|--------------------|--------------------|--------------------|
| 0.9726425330781150 | 0.9903492606831763 | 0.2335712928032544 |
| 0.1059721707722216 | 0.0567965901003425 | 0.2376748121794827 |
| 0.1735296580774823 | 0.9916166891180532 | 0.2328131894188531 |
| 0.3074642264880270 | 0.0588490097589084 | 0.2376702557954074 |
| 0.3732958947929620 | 0.9917876102117062 | 0.2362504259598386 |

|                    |                    |                    |
|--------------------|--------------------|--------------------|
| 0.5061299404036831 | 0.0580382239274025 | 0.2365830672314227 |
| 0.5729858938316486 | 0.9915875166347303 | 0.2412727242273724 |
| 0.7062739967493056 | 0.0576674588496929 | 0.2397881343195117 |
| 0.7738197237725597 | 0.9926618939533753 | 0.2409520675137354 |
| 0.9066763012631707 | 0.0573512730494221 | 0.2380796102041090 |
| 0.9738570735839278 | 0.1908964629988533 | 0.2432407032149249 |
| 0.1045950159601342 | 0.2563110802411752 | 0.2574806935730609 |
| 0.1715920442678804 | 0.1883438936349743 | 0.2554803835494836 |
| 0.3018652989265251 | 0.2481494779054364 | 0.2697350160337002 |
| 0.3756348084987014 | 0.1929270184136566 | 0.2512616015452413 |
| 0.5123974140164804 | 0.2624177595465085 | 0.2440087320131754 |
| 0.5741494180652632 | 0.1915757671546022 | 0.2344602560144627 |
| 0.7077849981282683 | 0.2557259586403102 | 0.2304664792746735 |
| 0.7739893362552001 | 0.1901695334598998 | 0.2343983043877394 |
| 0.9071529821106928 | 0.2572868449368865 | 0.2369318464796003 |
| 0.9734541568400921 | 0.3901030475925612 | 0.2343064596150268 |
| 0.1046175736703222 | 0.4576254966418633 | 0.2481548726239350 |
| 0.1670444074664319 | 0.3896312587119210 | 0.2662381314482664 |
| 0.2924377602730518 | 0.4607558742307709 | 0.2940839204226149 |
| 0.7079882121590317 | 0.4509710437529845 | 0.2209580239719904 |
| 0.7756606164850769 | 0.3873053127275709 | 0.2228961359604473 |
| 0.9081948703242838 | 0.4565606500015840 | 0.2234752573526808 |
| 0.9738196979628277 | 0.5897418144004982 | 0.2206847925420907 |
| 0.1059630450632077 | 0.6578634430647907 | 0.2316805959134302 |
| 0.1708912538267611 | 0.5913661077954742 | 0.2481900334711367 |
| 0.3012047051862977 | 0.6599996248876551 | 0.2675472058603514 |
| 0.3572973820692982 | 0.5899789382849776 | 0.2956725389797661 |
| 0.7747626926765396 | 0.5809045049139545 | 0.2050877852221707 |
| 0.9061928186916548 | 0.6549432267223465 | 0.2102481389272223 |
| 0.9723097847698821 | 0.7900015874858672 | 0.2147600616784334 |
| 0.1051173758149473 | 0.8571859628278036 | 0.2238988385956824 |
| 0.1724561594755418 | 0.7910040763898849 | 0.2311404859392383 |
| 0.3057111658937907 | 0.8581511716652058 | 0.2408728234917014 |
| 0.3710353426991995 | 0.7929213696495838 | 0.2582671796264552 |
| 0.5062658720303259 | 0.8593439316821092 | 0.2570887585206429 |
| 0.5770635746728219 | 0.7993752782545444 | 0.2689317204574734 |
| 0.7067511822294369 | 0.8596022036578327 | 0.2470369915228894 |
| 0.7731406350818822 | 0.7968347857330820 | 0.2262900752793361 |
| 0.9046768266986335 | 0.8570030892702217 | 0.2227731839407806 |
| 0.3663788988601400 | 0.3824070418740416 | 0.3371958925733496 |
| 0.5097172924009146 | 0.6672932609860881 | 0.3414769444847887 |
| 0.6782144548463402 | 0.6442096844076017 | 0.1894248156355031 |
| 0.5816241589787479 | 0.3912868751629173 | 0.2422139937548842 |
| 0.5641677005800937 | 0.5196790318092014 | 0.3158653185836902 |

0.6830122442301683 0.5718019851959411 0.3869994508649883

OOH@FeNS<sub>3</sub>C

1.0000000000000000

12.3236999512000001 0.0000000000000000 0.0000000000000000

-6.1625538564999998 10.6730391195000003 0.0000000000000000

0.0000000000000000 0.0000000000000000 15.0000000000000000

C S N Fe O H

44 3 1 1 2 1

Direct

0.9714011120269517 0.9892583142613706 0.2323912492823813

0.1048183067320464 0.0559016102955259 0.2361970740394395

0.1725820053993586 0.9908742555437164 0.2312697291066599

0.3064878069831795 0.0582357045306017 0.2358524554380975

0.3723084817470976 0.9912477461437976 0.2347830710047318

0.5052221410321170 0.0575744995928659 0.2346472964143351

0.5719685873499130 0.9909806354329821 0.2395539885172452

0.7052165321771870 0.0567290421554736 0.2378525010191882

0.7727052782849839 0.9917072221303352 0.2394362001119854

0.9054579144373650 0.0562310077872801 0.2365883344641489

0.9726708793900080 0.1897785357793213 0.2407090540000503

0.1034166103221605 0.2553461972424036 0.2543995090935443

0.1704983608783402 0.1875608908721887 0.2531220015352774

0.3011368526276154 0.2477652589445638 0.2668454181186664

0.3748031369756445 0.1925246629672680 0.2487930326867545

0.5116379602206782 0.2621048514545358 0.2415315422828694

0.5734080732264176 0.1909933591490000 0.2318629847560677

0.7067530169564440 0.2546048191964231 0.2272784889368397

0.7729347298681072 0.1890551078048027 0.2315666996416910

0.9060585644792705 0.2561910696696380 0.2336279124028749

0.9724750641470488 0.3890501250464923 0.2301920636184445

0.1035700036332583 0.4567363610460831 0.2441894543957563

0.1656475821823431 0.3886098840298393 0.2623265180255057

0.2911792444964477 0.4596197364480243 0.2893714291220337

0.7078835598660896 0.4500824902085483 0.2190301634956973

0.7749069093816661 0.3860656662565825 0.2191087341241697

0.9074177840993142 0.4555838468458877 0.2193943776479219

0.9731136469031199 0.5888774388545568 0.2176418913547241

0.1051036077729541 0.6571349963692660 0.2289206903687084

0.1697848454228160 0.5904826665686536 0.2447845734050894

0.2999243872671055 0.6591277928990977 0.2644631250542255

0.3557023256521282 0.5886262000974094 0.2910885961261511

0.7743309014043726 0.5800031819390138 0.2041171608326173

|                    |                    |                    |
|--------------------|--------------------|--------------------|
| 0.9056480661987097 | 0.6543045928764913 | 0.2083010908474416 |
| 0.9714051161595421 | 0.7892043730361916 | 0.2129945577416399 |
| 0.1041851604722932 | 0.8564813898557231 | 0.2222601207461111 |
| 0.1715201611069270 | 0.7903058991374999 | 0.2293548588471281 |
| 0.3047704465782481 | 0.8576399373599899 | 0.2394344119941429 |
| 0.3699836254834128 | 0.7923022145238156 | 0.2564358381639292 |
| 0.5052455339298040 | 0.8588466290141000 | 0.2554882659921224 |
| 0.5757621387079445 | 0.7985332009411688 | 0.2662892748677659 |
| 0.7053585096564862 | 0.8587107463737889 | 0.2452339313965387 |
| 0.7717716430042594 | 0.7957346763053406 | 0.2255983741148747 |
| 0.9032472435379855 | 0.8557950594356991 | 0.2216322312805141 |
| 0.3672444677539745 | 0.3833861810537579 | 0.3324170972706842 |
| 0.5093464036921341 | 0.6631013205637636 | 0.3351441641816439 |
| 0.6772703131400344 | 0.6429261001255192 | 0.1856499849808260 |
| 0.5820508884350599 | 0.3905977011783393 | 0.2411299841899270 |
| 0.5569561674026910 | 0.5184396707523093 | 0.2968795298896004 |
| 0.6498207466984933 | 0.5486045666754502 | 0.3990797859359215 |
| 0.7169343268249555 | 0.4769223989879814 | 0.4130590729163063 |
| 0.7694134658734880 | 0.5246992122395148 | 0.4635401212190010 |

O<sub>2</sub>@FeNS<sub>3</sub>C

1.000000000000000

12.3236999512000001 0.0000000000000000 0.0000000000000000

-6.1625538564999998 10.6730391195000003 0.0000000000000000

0.0000000000000000 0.0000000000000000 15.0000000000000000

C S N Fe O

44 3 1 1 2

Direct

|                    |                    |                    |
|--------------------|--------------------|--------------------|
| 0.9718927623476940 | 0.9888798025562734 | 0.2335423386636788 |
| 0.1057008251689908 | 0.0559016980338621 | 0.2363765513732378 |
| 0.1733633862864128 | 0.9909659182737134 | 0.2320101026630487 |
| 0.3074672904049165 | 0.0583538068754170 | 0.2370971293608963 |
| 0.3731388599008981 | 0.9913018953525148 | 0.2361461446376868 |
| 0.5059692938667617 | 0.0573805820109939 | 0.2363682717827448 |
| 0.5729117616994662 | 0.9909018594598666 | 0.2413909814818157 |
| 0.7061422546102235 | 0.0566430505606761 | 0.2394013958905953 |
| 0.7735706837222420 | 0.9916101943219841 | 0.2415766311549234 |
| 0.9063095164107101 | 0.0561241247695574 | 0.2374488779443676 |
| 0.9737672180224772 | 0.1898821191308962 | 0.2399321942243847 |
| 0.1047630972115728 | 0.2559152104161931 | 0.2521128633026965 |
| 0.1721517941289184 | 0.1883500517888337 | 0.2514735560185609 |
| 0.3028755132179239 | 0.2490599028743965 | 0.2646054139615854 |
| 0.3760062418879304 | 0.1924451436198433 | 0.2499218255382353 |

|                    |                    |                    |
|--------------------|--------------------|--------------------|
| 0.5128931377719200 | 0.2618371266742343 | 0.2457868844205895 |
| 0.5743649580611241 | 0.1910247384219381 | 0.2344593597260089 |
| 0.7079013766491525 | 0.2545621673832389 | 0.2291739101908340 |
| 0.7738870598465187 | 0.1889873072918519 | 0.2322589298752067 |
| 0.9071282891590768 | 0.2562255033724215 | 0.2330875832389355 |
| 0.9733626748632339 | 0.3889827233645508 | 0.2290019406972475 |
| 0.1045976472020304 | 0.4569720755821130 | 0.2419080883401270 |
| 0.1670468635761067 | 0.3891495131401259 | 0.2589641423836526 |
| 0.2928220495735147 | 0.4605335642741457 | 0.2851590139714619 |
| 0.7093086287105320 | 0.4502447468306962 | 0.2247874227056882 |
| 0.7760014416480707 | 0.3860752471457382 | 0.2215317901176712 |
| 0.9083439316234452 | 0.4556992738742106 | 0.2195580816868195 |
| 0.9736666864316151 | 0.5889438027717744 | 0.2178231215114211 |
| 0.1058534396159029 | 0.6573414417276291 | 0.2282611459640775 |
| 0.1707707714679281 | 0.5907546693292522 | 0.2431289484099624 |
| 0.3007916306095355 | 0.6594245959214299 | 0.2631974827843197 |
| 0.3569437488049252 | 0.5888867274023818 | 0.2887955046362969 |
| 0.7742470549042479 | 0.5796430268479049 | 0.2089835045672788 |
| 0.9057091661927781 | 0.6541111254026244 | 0.2104899970109852 |
| 0.9716399595674184 | 0.7889472498058716 | 0.2152826497450819 |
| 0.1046415490609350 | 0.8564424681673701 | 0.2231512479853777 |
| 0.1722116476792557 | 0.7904136380312123 | 0.2293598011389465 |
| 0.3053969311876945 | 0.8576754497894341 | 0.2398173568572872 |
| 0.3706697077126259 | 0.7924600752149777 | 0.2567085241184766 |
| 0.5059274382264443 | 0.8587683859498693 | 0.2574324345519834 |
| 0.5765627180449158 | 0.7987423922928857 | 0.2700027557800818 |
| 0.7061905834416989 | 0.8587833807262911 | 0.2493658092014373 |
| 0.7713436164565209 | 0.7942258776101029 | 0.2310324141681452 |
| 0.9030903810773611 | 0.8548605318525658 | 0.2247291133687017 |
| 0.3699996075168078 | 0.3866643099488838 | 0.3281744469386842 |
| 0.5076127818780842 | 0.6622041046842926 | 0.3377110109353192 |
| 0.6729674647268329 | 0.6389838440617320 | 0.1966341265181085 |
| 0.5847005054903356 | 0.3908081306252478 | 0.2500811358156411 |
| 0.5635860541622321 | 0.5171644686863042 | 0.3161957189518739 |
| 0.7164735101393290 | 0.5846013241294290 | 0.3948349970666477 |
| 0.6012251450327047 | 0.5072006736202427 | 0.4317753796211836 |

FeS<sub>4</sub>C

1.000000000000000

12.3236999512000001 0.0000000000000000 0.0000000000000000

-6.1625538564999998 10.6730391195000003 0.0000000000000000

0.0000000000000000 0.0000000000000000 15.0000000000000000

C S Fe

44 4 1

Direct



|                    |                    |                    |
|--------------------|--------------------|--------------------|
| 0.9738879000143682 | 0.9909480472762777 | 0.2426214774076872 |
| 0.1059649504637346 | 0.0557000190554158 | 0.2490937385134321 |
| 0.1722512572430025 | 0.9887209281558045 | 0.2452287935144735 |
| 0.3046990164806375 | 0.0530077140114660 | 0.2466651428079134 |
| 0.3731996553497962 | 0.9891804690892000 | 0.2463863441543806 |
| 0.5066188828460464 | 0.0563905942121187 | 0.2431627177483862 |
| 0.5739134951678305 | 0.9915518377253348 | 0.2487156741102403 |
| 0.7072154601647572 | 0.0584604053749106 | 0.2446496782542898 |
| 0.7753589086328814 | 0.9942173844389348 | 0.2455756678809380 |
| 0.9076950054566476 | 0.0580474588691901 | 0.2456949104234047 |
| 0.9739067177372345 | 0.1908462683147093 | 0.2528412081797783 |
| 0.1045292263944595 | 0.2552089731165310 | 0.2681330747401633 |
| 0.1718694186576496 | 0.1875246402961839 | 0.2648212637876055 |
| 0.3029232504534199 | 0.2467618192482980 | 0.2699787512030788 |
| 0.3714025433148074 | 0.1862048214796151 | 0.2482058611576830 |
| 0.5005090661975853 | 0.2476357251999934 | 0.2262158816575961 |
| 0.5724756718075407 | 0.1884035390262118 | 0.2281745501601577 |
| 0.7073310136738385 | 0.2555245801933488 | 0.2211961350409557 |
| 0.7737882437978989 | 0.1910407217500786 | 0.2353587663262847 |
| 0.9073052294675065 | 0.2574901999045303 | 0.2429986920855594 |
| 0.9738652899564035 | 0.3902411751844982 | 0.2417782052924395 |
| 0.1048156153942797 | 0.4567634213521805 | 0.2589268407081114 |
| 0.1673992484437827 | 0.3884243636686735 | 0.2766722504675981 |
| 0.2948039503071977 | 0.4590231743117986 | 0.2996379540877595 |
| 0.7195306658995912 | 0.4588960643338195 | 0.1908361973581968 |
| 0.7775892655435536 | 0.3883766242629387 | 0.2104339748985999 |
| 0.9093467031128042 | 0.4567623807767697 | 0.2247319434026061 |
| 0.9762391242397692 | 0.5905311983844441 | 0.2245586616286379 |
| 0.1072687233697067 | 0.6570392582567597 | 0.2416697339983676 |
| 0.1716519421512469 | 0.5905111671134635 | 0.2589370503850529 |
| 0.3025727001920271 | 0.6588761692579749 | 0.2767853933151840 |
| 0.3594986614223230 | 0.5884403938519548 | 0.2997676656632042 |
| 0.7842189275776332 | 0.5881097850010619 | 0.1904369195111663 |
| 0.9128263874917779 | 0.6588585442951959 | 0.2099679739559677 |
| 0.9754460231662292 | 0.7918034055790180 | 0.2205953679548850 |
| 0.1062888099941633 | 0.8561929379971088 | 0.2353936843390705 |
| 0.1733626043058740 | 0.7897491474084534 | 0.2431401446499299 |
| 0.3066037278862019 | 0.8563202898845678 | 0.2530081737707027 |
| 0.3729273453828514 | 0.7920053190489518 | 0.2680786480793719 |
| 0.5079353569526862 | 0.8597226304532272 | 0.2642765210079911 |
| 0.5796678330083903 | 0.8004053204673225 | 0.2687987770893700 |
| 0.7086818642371026 | 0.8610165036974095 | 0.2467793048352251 |
| 0.7765025955114130 | 0.7997344703931327 | 0.2248015953440381 |
| 0.9077316172604631 | 0.8590331422819825 | 0.2271882796859450 |

|                    |                    |                    |
|--------------------|--------------------|--------------------|
| 0.3846029139317279 | 0.3884982848576458 | 0.3282110450347678 |
| 0.5201172533308005 | 0.6593201611381858 | 0.3277841587327984 |
| 0.6924475065918799 | 0.6581652355019003 | 0.1669151938941801 |
| 0.5576100177320193 | 0.3887655655790910 | 0.1677013801909670 |
| 0.5373529742844496 | 0.5237087269223110 | 0.2461986515638770 |

OH@FeS<sub>4</sub>C

|                     |                     |                     |
|---------------------|---------------------|---------------------|
| 1.000000000000000   |                     |                     |
| 12.3236999512000001 | 0.0000000000000000  | 0.0000000000000000  |
| -6.1625538564999998 | 10.6730391195000003 | 0.0000000000000000  |
| 0.0000000000000000  | 0.0000000000000000  | 15.0000000000000000 |

|    |   |    |   |   |
|----|---|----|---|---|
| C  | S | Fe | O | H |
| 44 | 4 | 1  | 1 | 1 |

Direct

|                    |                    |                    |
|--------------------|--------------------|--------------------|
| 0.9725631325097726 | 0.9923766804075665 | 0.2375936189180659 |
| 0.1048246380275178 | 0.0572207987703940 | 0.2425658935279849 |
| 0.1708638501792618 | 0.9898562517883079 | 0.2397014180917192 |
| 0.3031454060842818 | 0.0541978590479531 | 0.2419072330736148 |
| 0.3717823519405500 | 0.9902315338464112 | 0.2405707600927136 |
| 0.5050369118330399 | 0.0573700959111733 | 0.2380487230609646 |
| 0.5724824938593430 | 0.9924876966939868 | 0.2424837220737520 |
| 0.7058767420513211 | 0.0598166048713354 | 0.2395370248283827 |
| 0.7738215658095005 | 0.9954489503117506 | 0.2415309276517118 |
| 0.9064353737225324 | 0.0594779914427995 | 0.2403491361742606 |
| 0.9728095906214940 | 0.1924351724423577 | 0.2454989309050035 |
| 0.1037400274226829 | 0.2570938743988234 | 0.2597860382393900 |
| 0.1705083108518945 | 0.1890331176480058 | 0.2575117223329124 |
| 0.3014714309305970 | 0.2485567583923400 | 0.2663808717556040 |
| 0.3696113945568129 | 0.1871333493438659 | 0.2461475901461026 |
| 0.4992597949891182 | 0.2489773714306422 | 0.2259695911717080 |
| 0.5713406424035169 | 0.1900362305802440 | 0.2260720568919700 |
| 0.7059451840835217 | 0.2571161187514174 | 0.2181095944995571 |
| 0.7724908371642417 | 0.1923302015636787 | 0.2305906346855145 |
| 0.9060086520767495 | 0.2587547252849876 | 0.2363773567041595 |
| 0.9729592713618533 | 0.3914588555380129 | 0.2339718051899427 |
| 0.1044860225186244 | 0.4580401572346108 | 0.2499211434998110 |
| 0.1675279153017706 | 0.3902633497461314 | 0.2678816791118703 |
| 0.2949835553113580 | 0.4603475803440626 | 0.2930052570250942 |
| 0.7168524229899041 | 0.4600081688444697 | 0.1892606417318113 |
| 0.7756423060788662 | 0.3895235815150411 | 0.2063161175788436 |
| 0.9082030597684683 | 0.4579983948502092 | 0.2179300140614511 |
| 0.9750629344210809 | 0.5917674247826213 | 0.2177384696961875 |
| 0.1063266068437367 | 0.6582534337305970 | 0.2336637739254460 |

|                    |                    |                    |
|--------------------|--------------------|--------------------|
| 0.1712899460550086 | 0.5916957856460623 | 0.2497607801660365 |
| 0.3020422014811331 | 0.6595130913000267 | 0.2677712890319774 |
| 0.3594917427470157 | 0.5895791285666285 | 0.2931341946629801 |
| 0.7816568948227614 | 0.5896255745361413 | 0.1891653507615229 |
| 0.9109244963406650 | 0.6601688214734335 | 0.2060285277257386 |
| 0.9736918564043743 | 0.7926102669494595 | 0.2176358291367631 |
| 0.1049142861491010 | 0.8573140439889332 | 0.2303693359169263 |
| 0.1720828705549882 | 0.7909572408783190 | 0.2361213957503689 |
| 0.3051752877301427 | 0.8572706598832790 | 0.2454386060384726 |
| 0.3715119946783149 | 0.7926682347063359 | 0.2597502935420825 |
| 0.5063914101292002 | 0.8605979265444469 | 0.2572804026925362 |
| 0.5777807977868370 | 0.8010032079930245 | 0.2661484591862183 |
| 0.7073915247959360 | 0.8625231512553776 | 0.2456183824053145 |
| 0.7753152213707079 | 0.8010393337817315 | 0.2251216160319919 |
| 0.9062633038653056 | 0.8598030262744931 | 0.2253025828769225 |
| 0.3731087526702233 | 0.3837694093794095 | 0.3330160805050444 |
| 0.5137479052180373 | 0.6668513831832487 | 0.3341418597508378 |
| 0.6841345175622737 | 0.6540361354815253 | 0.1791519727565426 |
| 0.5548318299274292 | 0.3949087602545348 | 0.1778838904159334 |
| 0.5794017715089356 | 0.5246515104015776 | 0.3138394963107362 |
| 0.6918066133220263 | 0.5407214850956307 | 0.3996047073140746 |
| 0.6961025241661707 | 0.4692003959125804 | 0.4224733253754305 |

O@FeS<sub>4</sub>C

|                     |                     |                     |   |
|---------------------|---------------------|---------------------|---|
| 1.000000000000000   |                     |                     |   |
| 12.3236999512000001 | 0.0000000000000000  | 0.0000000000000000  |   |
| -6.1625538564999998 | 10.6730391195000003 | 0.0000000000000000  |   |
| 0.0000000000000000  | 0.0000000000000000  | 15.0000000000000000 |   |
| C                   | S                   | Fe                  | O |
| 44                  | 4                   | 1                   | 1 |

Direct

|                    |                    |                    |
|--------------------|--------------------|--------------------|
| 0.9730906229551148 | 0.9913774854224433 | 0.2388257822183740 |
| 0.1054460929746419 | 0.0562456150755516 | 0.2436272792708453 |
| 0.1712254151614988 | 0.9886301883276117 | 0.2410866619506480 |
| 0.3036559085470434 | 0.0529225718373497 | 0.2427079812073489 |
| 0.3721009528126797 | 0.9887569316668882 | 0.2417736465565826 |
| 0.5053655023381647 | 0.0559243282857949 | 0.2388694778440644 |
| 0.5728550542805511 | 0.9910779125807211 | 0.2436244078253504 |
| 0.7062392992453513 | 0.0586785184057966 | 0.2410483151890346 |
| 0.7743722192181095 | 0.9943820770257854 | 0.2426353913336964 |
| 0.9069986457855530 | 0.0585644388378823 | 0.2417111431177840 |
| 0.9732759708521461 | 0.1914542681147207 | 0.2476244164828853 |
| 0.1043260444250966 | 0.2561584264635590 | 0.2617149414715988 |

|                    |                    |                    |
|--------------------|--------------------|--------------------|
| 0.1715263460491602 | 0.1883690479521352 | 0.2584259776075465 |
| 0.3024772168500449 | 0.2477897061242114 | 0.2668227124007189 |
| 0.3702021236889123 | 0.1859539435683811 | 0.2457935564054726 |
| 0.4994067072302913 | 0.2474011476772333 | 0.2244469773780789 |
| 0.5715000410165555 | 0.1884957920370355 | 0.2259928061356837 |
| 0.7063025365539616 | 0.2560128912033980 | 0.2195112389083102 |
| 0.7728427116333880 | 0.1913481250675780 | 0.2327836046096413 |
| 0.9063515377491727 | 0.2577701653506093 | 0.2392641845950153 |
| 0.9730270529356316 | 0.3904581300696798 | 0.2377034755100340 |
| 0.1045217595482110 | 0.4568896906921984 | 0.2536683269917569 |
| 0.1679232801051687 | 0.3890797973707038 | 0.2705095963910733 |
| 0.2957797096091940 | 0.4589968404296361 | 0.2947389977876115 |
| 0.7172748598267621 | 0.4587983344299931 | 0.1897089068521495 |
| 0.7759075985013523 | 0.3884693309870365 | 0.2082127076242616 |
| 0.9081934098429524 | 0.4568728177954790 | 0.2214170108736446 |
| 0.9749660799696362 | 0.5904383604914697 | 0.2214307639499354 |
| 0.1062247014253441 | 0.6568481889310204 | 0.2377257120101620 |
| 0.1712778366626372 | 0.5904005101847777 | 0.2536704415620557 |
| 0.3025115979416829 | 0.6582245502492616 | 0.2704872753165166 |
| 0.3604405004781963 | 0.5882920249590115 | 0.2947076474247736 |
| 0.7821356840974969 | 0.5885120598017030 | 0.1897092309443365 |
| 0.9110841728514965 | 0.6588359918506260 | 0.2082314712520801 |
| 0.9739328799218750 | 0.7912763442429949 | 0.2195252330364801 |
| 0.1051429087544252 | 0.8559606679640999 | 0.2328204603530178 |
| 0.1722304057680306 | 0.7895407354128167 | 0.2393074812623363 |
| 0.3054842793406002 | 0.8558701179029755 | 0.2476540738841258 |
| 0.3718294093801652 | 0.7911609533207310 | 0.2616917371648175 |
| 0.5068240907191717 | 0.8589504373400351 | 0.2583864562077215 |
| 0.5783463766721257 | 0.7995167985570073 | 0.2667377833401563 |
| 0.7078959701179450 | 0.8613511478615954 | 0.2457049708566980 |
| 0.7756522065679563 | 0.7998939850662655 | 0.2243738038459890 |
| 0.9066567975300005 | 0.8587980785165386 | 0.2259572177293781 |
| 0.3757237101056879 | 0.3833289939210901 | 0.3334511826593238 |
| 0.5160962533381970 | 0.6639801016859100 | 0.3333576465244143 |
| 0.6861385048772259 | 0.6541630843239591 | 0.1759763970645732 |
| 0.5555871614555409 | 0.3931466547171705 | 0.1760473956799420 |
| 0.5817507651114130 | 0.5236567096631738 | 0.3128909329013047 |
| 0.6680792031764463 | 0.5235458122363529 | 0.3982752744906473 |

OOH@FeS<sub>4</sub>C

1.0000000000000000

12.3236999512000001 0.0000000000000000 0.0000000000000000

-6.1625538564999998 10.6730391195000003 0.0000000000000000

0.0000000000000000 0.0000000000000000 15.0000000000000000

C S Fe O H  
44 4 1 2 1

Direct

|                    |                    |                    |
|--------------------|--------------------|--------------------|
| 0.9726718723059096 | 0.9933604556986946 | 0.2379646438440061 |
| 0.1049029541439510 | 0.0582184921652120 | 0.2429378164137888 |
| 0.1709276435707719 | 0.9908141896114897 | 0.2396786679732603 |
| 0.3032353194322121 | 0.0552022575133787 | 0.2416403627544181 |
| 0.3718481561362137 | 0.9911911727405839 | 0.2400185217239538 |
| 0.5051596196904088 | 0.0583904288427686 | 0.2373474354230709 |
| 0.5725736929518930 | 0.9935165114291464 | 0.2421863881566854 |
| 0.7060314149475591 | 0.0610214168864317 | 0.2394062065737059 |
| 0.7740469441063427 | 0.9966622628604693 | 0.2415217388126899 |
| 0.9066099055261693 | 0.0606099583461734 | 0.2404347444428905 |
| 0.9729008330574148 | 0.1935509302187325 | 0.2455939284257215 |
| 0.1037457205242932 | 0.2580563696569322 | 0.2605511177261394 |
| 0.1705964221526793 | 0.1899369690875235 | 0.2583324275375590 |
| 0.3015403139353829 | 0.2493365615940243 | 0.2674090373408369 |
| 0.3697517133895768 | 0.1881138764854866 | 0.2463587271836104 |
| 0.4993190736168752 | 0.2499141470416766 | 0.2258004396154577 |
| 0.5714814366293345 | 0.1910476481706704 | 0.2253504317009296 |
| 0.7060645366274523 | 0.2582749192752110 | 0.2174327607874988 |
| 0.7725850313327137 | 0.1935216871876355 | 0.2300501692563669 |
| 0.9061563401967235 | 0.2598713192460448 | 0.2358894692198145 |
| 0.9731570871584245 | 0.3925511904580266 | 0.2332403684301433 |
| 0.1045271347678031 | 0.4590291088166626 | 0.2497853210752858 |
| 0.1673242525573808 | 0.3911647105639916 | 0.2686455992448537 |
| 0.2946695143196503 | 0.4611807547724350 | 0.2938909491472754 |
| 0.7171634450000666 | 0.4612694444182554 | 0.1888053611997996 |
| 0.7758070463046518 | 0.3906093063716192 | 0.2056028975310575 |
| 0.9084075612452460 | 0.4589888258191721 | 0.2169204574862776 |
| 0.9752937030992297 | 0.5927242436972685 | 0.2169112425083471 |
| 0.1064709298365952 | 0.6591716221011400 | 0.2331534128292072 |
| 0.1714091580692299 | 0.5926303602373032 | 0.2495882479032069 |
| 0.3022308070520251 | 0.6604795791479221 | 0.2677282397744880 |
| 0.3596263946941174 | 0.5904634382442941 | 0.2929985289159266 |
| 0.7822280693368044 | 0.5909243387714829 | 0.1878056576488903 |
| 0.9112921508716066 | 0.6613235945472534 | 0.2050739903872305 |
| 0.9738390528397413 | 0.7936443163882284 | 0.2173636201200543 |
| 0.1050884852845882 | 0.8583479771940534 | 0.2300901867358396 |
| 0.1722414149159238 | 0.7919238428673456 | 0.2356773970583819 |
| 0.3053376781967191 | 0.8582509764817359 | 0.2450283035782261 |
| 0.3716356986375154 | 0.7935677488746437 | 0.2593733408177513 |
| 0.5065037731718935 | 0.8616373502268169 | 0.2570489958480662 |

|                    |                    |                    |
|--------------------|--------------------|--------------------|
| 0.5779240986973058 | 0.8020689154975721 | 0.2656311500542893 |
| 0.7076384364309526 | 0.8637242407734307 | 0.2453020006166723 |
| 0.7754179292704206 | 0.8020306306603311 | 0.2246667523153265 |
| 0.9064403937251420 | 0.8608258431790645 | 0.2253090336503118 |
| 0.3722770217481154 | 0.3842297310358720 | 0.3347309727968792 |
| 0.5149454921508612 | 0.6664697679448064 | 0.3317346386305524 |
| 0.6852660902419362 | 0.6559529860190758 | 0.1767890875738726 |
| 0.5549996529506667 | 0.3971264043526759 | 0.1803215147281695 |
| 0.5777675643253337 | 0.5259097837830777 | 0.3133370590050827 |
| 0.6922836203977559 | 0.5435985848838459 | 0.3991795726158541 |
| 0.6906157153320942 | 0.4229097486240364 | 0.4088288582618149 |
| 0.6618618950963284 | 0.4021799101882741 | 0.4706823255984642 |

O<sub>2</sub>@FeS<sub>4</sub>C

1.000000000000000

12.3236999512000001 0.0000000000000000 0.0000000000000000

-6.1625538564999998 10.6730391195000003 0.0000000000000000

0.0000000000000000 0.0000000000000000 15.0000000000000000

C S Fe O H

44 4 1 2 1

Direct

|                    |                    |                    |
|--------------------|--------------------|--------------------|
| 0.9726718723059096 | 0.9933604556986946 | 0.2379646438440061 |
| 0.1049029541439510 | 0.0582184921652120 | 0.2429378164137888 |
| 0.1709276435707719 | 0.9908141896114897 | 0.2396786679732603 |
| 0.3032353194322121 | 0.0552022575133787 | 0.2416403627544181 |
| 0.3718481561362137 | 0.9911911727405839 | 0.2400185217239538 |
| 0.5051596196904088 | 0.0583904288427686 | 0.2373474354230709 |
| 0.5725736929518930 | 0.9935165114291464 | 0.2421863881566854 |
| 0.7060314149475591 | 0.0610214168864317 | 0.2394062065737059 |
| 0.7740469441063427 | 0.9966622628604693 | 0.2415217388126899 |
| 0.9066099055261693 | 0.0606099583461734 | 0.2404347444428905 |
| 0.9729008330574148 | 0.1935509302187325 | 0.2455939284257215 |
| 0.1037457205242932 | 0.2580563696569322 | 0.2605511177261394 |
| 0.1705964221526793 | 0.1899369690875235 | 0.2583324275375590 |
| 0.3015403139353829 | 0.2493365615940243 | 0.2674090373408369 |
| 0.3697517133895768 | 0.1881138764854866 | 0.2463587271836104 |
| 0.4993190736168752 | 0.2499141470416766 | 0.2258004396154577 |
| 0.5714814366293345 | 0.1910476481706704 | 0.2253504317009296 |
| 0.7060645366274523 | 0.2582749192752110 | 0.2174327607874988 |
| 0.7725850313327137 | 0.1935216871876355 | 0.2300501692563669 |
| 0.9061563401967235 | 0.2598713192460448 | 0.2358894692198145 |
| 0.9731570871584245 | 0.3925511904580266 | 0.2332403684301433 |
| 0.1045271347678031 | 0.4590291088166626 | 0.2497853210752858 |

|                    |                    |                    |
|--------------------|--------------------|--------------------|
| 0.1673242525573808 | 0.3911647105639916 | 0.2686455992448537 |
| 0.2946695143196503 | 0.4611807547724350 | 0.2938909491472754 |
| 0.7171634450000666 | 0.4612694444182554 | 0.1888053611997996 |
| 0.7758070463046518 | 0.3906093063716192 | 0.2056028975310575 |
| 0.9084075612452460 | 0.4589888258191721 | 0.2169204574862776 |
| 0.9752937030992297 | 0.5927242436972685 | 0.2169112425083471 |
| 0.1064709298365952 | 0.6591716221011400 | 0.2331534128292072 |
| 0.1714091580692299 | 0.5926303602373032 | 0.2495882479032069 |
| 0.3022308070520251 | 0.6604795791479221 | 0.2677282397744880 |
| 0.3596263946941174 | 0.5904634382442941 | 0.2929985289159266 |
| 0.7822280693368044 | 0.5909243387714829 | 0.1878056576488903 |
| 0.9112921508716066 | 0.6613235945472534 | 0.2050739903872305 |
| 0.9738390528397413 | 0.7936443163882284 | 0.2173636201200543 |
| 0.1050884852845882 | 0.8583479771940534 | 0.2300901867358396 |
| 0.1722414149159238 | 0.7919238428673456 | 0.2356773970583819 |
| 0.3053376781967191 | 0.8582509764817359 | 0.2450283035782261 |
| 0.3716356986375154 | 0.7935677488746437 | 0.2593733408177513 |
| 0.5065037731718935 | 0.8616373502268169 | 0.2570489958480662 |
| 0.5779240986973058 | 0.8020689154975721 | 0.2656311500542893 |
| 0.7076384364309526 | 0.8637242407734307 | 0.2453020006166723 |
| 0.7754179292704206 | 0.8020306306603311 | 0.2246667523153265 |
| 0.9064403937251420 | 0.8608258431790645 | 0.2253090336503118 |
| 0.3722770217481154 | 0.3842297310358720 | 0.3347309727968792 |
| 0.5149454921508612 | 0.6664697679448064 | 0.3317346386305524 |
| 0.6852660902419362 | 0.6559529860190758 | 0.1767890875738726 |
| 0.5549996529506667 | 0.3971264043526759 | 0.1803215147281695 |
| 0.5777675643253337 | 0.5259097837830777 | 0.3133370590050827 |
| 0.6922836203977559 | 0.5435985848838459 | 0.3991795726158541 |
| 0.6906157153320942 | 0.4229097486240364 | 0.4088288582618149 |
| 0.6618618950963284 | 0.4021799101882741 | 0.4706823255984642 |
